# Supplementary material
Source: publisher figshare collection journal article supplement (https://sage.figshare.com/ndownloader/files/38645017)
Supplement: Supplementary file 1 [file 38645017]

## Sheet: Title and absract screening
Ref ID	Link	Titel	Udgivelsesår	Relevant/irrelevant	Kommentarer	Gennemgået (dato)
23243	https://www.liebertpub.com/doi/full/10.1089/dia.2021.0144	Not All Type-2-Diabetes Patients Increase Body Mass Index After Initiating Insulin: Results of Latent Class Analysis from the DPV Registry	2021	Irrelevant	Undersøger hvorvidt initiering af insulin er forbundet med stigning i BMI blandt alle personer med type 2 diabetes. Så imødekommer ikke inklusionskriteriet om at stuidet skal undersøge dose guidance.	2021-12-09
23255	https://www.tandfonline.com/doi/full/10.1080/07853890.2021.1925148	Practical guidance on the initiation, titration, and switching of basal insulins: a narrative review for primary care	2021	Irrelevant	Det er et narrativt review	2021-12-09
23238	https://onlinelibrary.wiley.com/doi/10.1111/dme.14745	The experience of a severe hypoglycemic event from the perspective of people with diabetes and their caregivers: "What am I going to do?"	2021	Irrelevant	Undersøger oplevelsen af et hypoglykæmisk event hos perosner med type 1 eller type 2 diabetes, og hvilken indflydelse dette havde på beslutningsprocessen mellem patient og læge. Så imødekommer ikke inklusionskriteriet om at stuidet skal undersøge dose guidance.	2021-12-09
23244	https://www.sciencedirect.com/science/article/pii/S0024320521009000?via%3Dihub	Biliverdin reductase-A protein levels are reduced in type 2 diabetes and are associated with poor glycometabolic control	2021	Irrelevant	Undersøge hvorvidt biliverdin reductase-A udtrykket er øget i type 2 diabetes. Handler bare ikke om dose guidance.	2021-12-09
23239	https://journals.sagepub.com/doi/full/10.1177/20420188211054688	Designing an integrated, nurse-driven and home-based digital intervention to improve insulin management in under-resourced settings	2021	Relevant	Handler om udvikling af en nurse-driven and home-based digital intervention to improve insulin management i syd afrika.	2021-12-09
23240	https://link.springer.com/article/10.1186/s12933-021-01389-1	The management of type 2 diabetes before, during and after Covid-19 infection: what is the evidence?	2021	Irrelevant	Commentary Handler ikke om undersøgelse af dose guidance til type 2 diabetes.	2021-12-09
23257	https://www.ncbi.nlm.nih.gov/pmc/articles/PMC8455761/	Sodium-glucose cotransporter 2 inhibitors: a practical guide for the Dutch cardiologist based on real-world experience	2021	Irrelevant	Highlight effekten af SGLT2 iht. kadiovaskulære events based på real-world data og expert opion.	2021-12-09
23274	https://www.ncbi.nlm.nih.gov/pmc/articles/PMC8504902/	Simplification of complex insulin regimens using canagliflozin or liraglutide in patients with well‐controlled type 2 diabetes: A 24‐week randomized controlled trial	2021	Irrelevant	Undersøger potenitalet for brug af canagliflizon sammenlignet med liraglutide som et alternativ til bolus insulin ved personer med velkontrolleret type 2 diabetes, som modtager multiple daiyly insulin therapy.	2021-12-09
23242	https://onlinelibrary.wiley.com/doi/10.1111/jdi.13677	Comparisons of efficacy and safety in insulin glargine and lixisenatide plus glulisine combination therapy with multiple daily injection therapy in Japanese patients with type 2 diabetes	2021	Irrelevant	Sammenligner multiple daily insulin therapy med lixisentide kombineret therapies.	2021-12-09
23251	https://link.springer.com/article/10.1007/s13300-021-01116-9	Glucagon-Like Peptide 1 Receptor Agonist Usage in Type 2 Diabetes in Primary Care for the UK and Beyond: A Narrative Review	2021	Irrelevant	review	2021-12-09
23254	https://journals.sagepub.com/doi/full/10.1177/19322968211026626	Simulation-Based Evaluation of Dose Titration Algorithms for U-500R Insulin by Pump in Subjects with Type 2 Diabetes	2021	Relevant	Har ikke et absract så det må læses i fuldtekst	2021-12-09
23260	https://dom-pubs.onlinelibrary.wiley.com/doi/full/10.1111/dom.14458	Efficient and safe glycaemic control with basal-bolus insulin therapy during fasting periods in hospitalized patients with type 2 diabetes using decision support technology: A post hoc analysis	2021	Irrelevant	Evaluering af basalbolus insulin regime iht. vedligholdelse af glykæmisk kontrol under fasting perioder ved hospitals indlagte patienter med type 2 diabetes.	2021-12-09
23245	https://www.ncbi.nlm.nih.gov/pmc/articles/PMC8433929/	Effects of Telemetric Interventions on Maternal and Fetal or Neonatal Outcomes in Gestational Diabetes: Systematic Meta-Review	2021	Irrelevant	review	2021-12-09
23253	https://www.sciencedirect.com/science/article/pii/S0939475321002830?via%3Dihub	Initial treatment of diabetes in Italy. A nationwide population-based study from of the ARNO Diabetes Observatory	2021	Irrelevant	Undersøger initiering af diabetes behandling og fortsættelse de følgende 6 måneder i nyligt diagnotiseret type 2 diabetes blandt italienske personer	2021-12-09
23247	https://www.sciencedirect.com/science/article/pii/S0140673621014434?via%3Dihub	Once-weekly tirzepatide versus once-daily insulin degludec as add-on to metformin with or without SGLT2 inhibitors in patients with type 2 diabetes (SURPASS-3): a randomised, open-label, parallel-group, phase 3 trial	2021	Irrelevant	Sammenligner tirzepatide og titreret degludec hos personer med type 2 diabetes utilstrækkeligt kontrolleret ved brug af metformin med eller uden SGLT2 inhibitors.	2021-12-09
23246	https://www.ncbi.nlm.nih.gov/pmc/articles/PMC8380766/	Adapting Medication for Type 2 Diabetes to a Low Carbohydrate Diet	2021	Irrelevant	review	2021-12-09
23283	https://www.sciencedirect.com/science/article/pii/S1530891X21000185	The Effect of Prestudy Insulin Therapy on Safety and Efficacy of Human Regular U-500 Insulin by Pump or Injection: A Posthoc Analysis	2021	Irrelevant	Post-hoc analyse har forskellige mål i fire forskellige subgrupper. Ser ikke på dose guidance	2021-12-09
23249	https://journals.sagepub.com/doi/full/10.1177/19322968211034533	Effect of Digital-Tool-Supported Basal Insulin Titration Algorithm in Reaching Glycemic Control in Patients with Type 2 Diabetes in Mexico	2021	Relevant	Pilot study for My Dose Coach, som er en app kombineret med en web portal som kan foreslå optimerede basal insulin doser	2021-12-09
23250	https://cardiab.biomedcentral.com/articles/10.1186/s12933-021-01348-w	Triglyceride-rich lipoprotein and LDL particle subfractions and their association with incident type 2 diabetes: the PREVEND study	2021	Irrelevant	Undersøger TRLP og LDLP ift. deres forbindelse til beta cell function og incidensen af type 2 diabetes i befolkningen.	2021-12-09
23248	https://www.ncbi.nlm.nih.gov/pmc/articles/PMC8294995/	Fasting Glucose of 6.1 mmol/L as a Possible Optimal Target for Type 2 Diabetic Patients with Insulin Glargine: A Randomized Clinical Trial	2021	Relevant	Undersøger betydningen af forskellige titrations algoritmers betydning for glykæmisk variation blandt type 2 diabetikere	2021-12-09
23252	https://www.ncbi.nlm.nih.gov/pmc/articles/PMC8283002/	Novel Reclassification of Adult Diabetes Is Useful to Distinguish Stages of β-Cell Function Linked to the Risk of Vascular Complications: The DOLCE Study From Northern Ukraine	2021	Irrelevant	Undersøger subgrupper indenfor diagnoserne type 1 og type 2 diabetes.	2021-12-09
23259		Impaired Ca(2+) signaling due to hepatic steatosis mediates hepatic insulin resistance in Alström syndrome mice that is reversed by GLP-1 analog treatment	2021	Irrelevant	handler ikke om dose guidance	2021-12-09
23264	https://www.sciencedirect.com/science/article/pii/S092544392100082X?via%3Dihub	The BACE1 inhibitor LY2886721 improves diabetic phenotypes of BACE1 knock-in mice	2021	Irrelevant	Dyrestudie	2021-12-09
23261	https://www.spandidos-publications.com/10.3892/or.2021.8102	Binding between ROCK1 and DCTN2 triggers diabetes‑associated centrosome amplification in colon cancer cells	2021	Irrelevant	Undersøger ikke dose guidance	2021-12-09
23265	https://care.diabetesjournals.org/content/early/2021/04/15/dc20-2878.abstract	A Randomized, Open-Label Comparison of Once-Weekly Insulin Icodec Titration Strategies Versus Once-Daily Insulin Glargine U100	2021	Relevant	Undersøger icodec's sikkerhed og virkning ved brug af forskellige titrations algoritmer.	2021-12-09
23350		Insulin-Dependence Predicts Surgical Complications and Hospital Admission following Knee Arthroscopy	2021	Irrelevant	Sammenligner risikoen for postoperative komplikationer blandt patienter med insulin-dependent diabetes og noninsulin-dependent following knee arthroscopy. Undersøger ikke dose guidance	2021-12-09
23256	https://www.ncbi.nlm.nih.gov/pmc/articles/PMC8213191/	Insulin resistance genetic risk score and burden of coronary artery disease in patients referred for coronary angiography	2021	Irrelevant	Undersøger om en genetisk risk score er forbundet med diabetes og coronary artery disease	2021-12-09
23258	https://www.e-dmj.org/journal/view.php?doi=10.4093/dmj.2020.0274	Efficacy and Safety of Self-Titration Algorithms of Insulin Glargine 300 units/mL in Individuals with Uncontrolled Type 2 Diabetes Mellitus (The Korean TITRATION Study): A Randomized Controlled Trial	2021	Relevant	sammenligner to insulin titrerings algoritmer	2021-12-09
23300	https://www.cambridge.org/core/journals/british-journal-of-nutrition/article/predictors-of-postprandial-glycaemia-insulinaemia-and-insulin-resistance-in-adolescents/FDD3D4BE73125D35C97E479C2BCD4933	Predictors of postprandial glycaemia, insulinaemia and insulin resistance in adolescents	2021	Irrelevant	Undesøger ikke dose guidance	2021-12-09
23262	https://journals.sagepub.com/doi/full/10.1177/19322968211016513	Comparing Patch vs Pen Bolus Insulin Delivery in Type 2 Diabetes Using Continuous Glucose Monitoring Metrics and Profiles	2021	Irrelevant	Handler om basal-bolus regime	2021-12-09
23275	https://jamanetwork.com/journals/jamainternalmedicine/fullarticle/2777049	Severe Hypoglycemia Risk With Long-Acting Insulin Analogs vs Neutral Protamine Hagedorn Insulin	2021	Irrelevant	Undersøger risikoen for indlæggelse blandt type 2 diabetikere ved initiering af basal insulin blandt ældre i et real-world setting¨.	2021-12-09
23267	https://www.sciencedirect.com/science/article/pii/S1530891X20483624	Ultra Rapid-Acting Inhaled Insulin Improves Glucose Control in Patients With Type 2 Diabetes Mellitus	2021	Irrelevant	Undersøger om brugen af inhalations insulin vil forbedre HbA1c bland type 2 diabetikere.	2021-12-09
23268		Glycemic Control and Prevention of Diabetic Complications in Low- and Middle-Income Countries: An Expert Opinion	2021	Irrelevant	expert opinion	2021-12-09
23269	https://www.sciencedirect.com/science/article/pii/S2213858721000504	Prescription of glucose-lowering therapies and risk of COVID-19 mortality in people with type 2 diabetes: a nationwide observational study in England	2021	Irrelevant	Undersøger noget med hyperglykæmi blandt type 2 diabetikere og risiko for corona-relateret død.	2021-12-09
23273	https://www.ncbi.nlm.nih.gov/pmc/articles/PMC7957039/	Expert Opinion: A Call for Basal Insulin Titration in Patients with Type 2 Diabetes in Daily Practice: Southeast European Perspective	2021	Irrelevant	expert opinion	2021-12-09
23299		Risk factors for abnormal postpartum glycemic states in women diagnosed with gestational diabetes by the International Association of Diabetes and Pregnancy Study Groups criteria	2021	Irrelevant	gestational diabetes	2021-12-09
23383	https://www.tandfonline.com/doi/full/10.1080/09546634.2019.1657224	Topical corticosteroids and risk of diabetes mellitus: systematic review and meta-analysis	2021	Irrelevant	review	2021-12-09
23280	https://academic.oup.com/jn/article/151/4/970/6131873	Associations of Serum Fatty Acid Proportions with Obesity, Insulin Resistance, Blood Pressure, and Fatty Liver: The Cardiovascular Risk in Young Finns Study	2021	Irrelevant	handler ikke om dose guidance	2021-12-09
23263	https://www.ncbi.nlm.nih.gov/pmc/articles/PMC8065491/	Characteristics, Management, and Outcomes of Elderly Patients with Diabetes in a Covid-19 Unit: Lessons Learned from a Pilot Study	2021	Irrelevant	handler ikke om dose guidance	2021-12-09
23271	https://www.sciencedirect.com/science/article/pii/S0261561421001394?via%3Dihub	Short energy intake is associated with muscle mass loss in older patients with type 2 diabetes: A prospective study of the KAMOGAWA-DM cohort	2021	Irrelevant	Undersøger forholdet mellem energi indtag og tab af muskel masse ved type 2 diabetes.	2021-12-09
23270	https://www.dovepress.com/efficacy-and-safety-of-a-decision-support-intervention-for-basal-insul-peer-reviewed-fulltext-article-DMSO	Efficacy and Safety of a Decision Support Intervention for Basal Insulin Self-Titration Assisted by the Nurse in Outpatients with T2DM: A Randomized Controlled Trial	2021	Relevant	evaluering af en kombination af fasting blood glucose, glucose based dosage self-titration og telefonisk DSS.	2021-12-09
23272	https://onlinelibrary.wiley.com/doi/full/10.1111/imj.15245	Managing inpatient hyperglycaemia and initiating sodium-glucose cotransporter 2 inhibitor therapy in the setting of diabetes and acute coronary syndrome	2021	Irrelevant	Handler ikke basal insulins tritrering	2021-12-09
23281	https://www.sciencedirect.com/science/article/pii/S0168822721000395?via%3Dihub	Deintensification of basal-bolus insulin after initiation of GLP-1RA in patients with type 2 diabetes under routine care	2021	Irrelevant	Undersøger om man kan deintensivere basal-bolus regime ved introducering af GLP-1RA	2021-12-09
23348	https://journals.sagepub.com/doi/full/10.1177/1932296819900240	Feasibility of a New Approach to Initiate Insulin in Type 2 Diabetes	2021	Relevant	investigated feasibility of a new approach to basal insulin initiation, where the dose needed to reach a glycemic target is estimated from two weeks of insulin and continuous glucose monitoring (CGM) data	2021-12-09
23276	https://www.ncbi.nlm.nih.gov/pmc/articles/PMC7943340/	A Web-Based Computer-Tailored Program to Improve Treatment Adherence in Patients With Type 2 Diabetes: Randomized Controlled Trial	2021	Irrelevant	to examine the effectiveness of the eHealth program to impove T2D treatment adherence	2021-12-09
23278	https://www.nature.com/articles/s41598-021-83253-6	A nationwide cohort study for comparative vascular safety of long-acting insulin analogue versus intermediate-acting human insulin in type 2 diabetes	2021	Irrelevant	This study sought to examine the vascular and hypoglycemic effects associated with IAHI versus LAIA in real-world patients with T2D. (intermediate-acting human insulin [IAHI] or long-acting insulin analogue [LAIA])	2021-12-09
23284	https://www.ncbi.nlm.nih.gov/pmc/articles/PMC7875702/	Machine Learning Approach to Decision Making for Insulin Initiation in Japanese Patients With Type 2 Diabetes (JDDM 58): Model Development and Validation Study	2021	Irrelevant	The objectives of this study were to examine the ability of machine learning models to predict insulin initiation by specialists and whether the machine learning approach could support decision making by general physicians for insulin initiation in patients with type 2 diabetes. Der gives ikke guidance ift. insulin dosis	2021-12-09
23277		Sweet and Salty: Diabetic Ketoacidosis in a Patient With Nephrogenic Diabetes Insipidus	2021	Irrelevant	case report - handler ikke om doe guidance	2021-12-09
20601	https://ieeexplore.ieee.org/document/9308924	A Model-Free Approach to Automatic Dose Guidance in Long Acting Insulin Treatment of Type 2 Diabetes	2021	Relevant	a model-free insulin titration algorithm for patients with type 2 diabetes that automatically finds and maintains the optimal insulin dosage in order to maintain the blood glucose concentration at desired levels.	2021-12-09
20606	https://link.springer.com/article/10.1186/s12916-021-01997-4	Promoting physical activity in a multi-ethnic population at high risk of diabetes: the 48-month PROPELS randomised controlled trial	2021	Irrelevant	The aim of the study was to investigate the long-term effectiveness of the Walking Away programme, an established group-based behavioural physical activity intervention with pedometer use, when delivered alone or with a supporting mHealth intervention	2021-12-09
20608	https://www.ncbi.nlm.nih.gov/pmc/articles/PMC7824926/	Facilitating participation in cardiovascular preventive initiatives among people with diabetes: a qualitative study	2021	Irrelevant	handler ikke om dose guidance	2021-12-09
20609		Comparison of short-pulse subthreshold (532 nm) and infrared micropulse (810 nm) macular laser for diabetic macular edema	2021	Irrelevant	handler ikke om dose guidance	2021-12-09
20611	https://www.ncbi.nlm.nih.gov/pmc/articles/PMC8600252/	Molecular Mechanisms of Nutrient-Mediated Regulation of MicroRNAs in Pancreatic β-cells	2021	Irrelevant	review	2021-12-09
20612	https://www.ncbi.nlm.nih.gov/pmc/articles/PMC8595278/	Oral Antidiabetics and Sleep Among Type 2 Diabetes Patients: Data From the UK Biobank	2021	Irrelevant	Undersøger hvorvidt der er en sammenhæng mellem oral antidiabetic therapy og søvnbesvær blandt type 2-diabetikere.	2021-12-09
20613	https://web.s.ebscohost.com/ehost/pdfviewer/pdfviewer?vid=1&sid=2502c9ab-4217-44bd-b33f-65b46e735749%40redis	Epidemiology of type 2 diabetes remission in Scotland in 2019: A cross-sectional population-based study	2021	Irrelevant	handler ikke om dose guidance	2021-12-09
20614	https://www.ajmc.com/view/patient-and-supporter-factors-affecting-engagement-with-diabetes-telehealth	Patient and supporter factors affecting engagement with diabetes telehealth	2021	Irrelevant	handler ikke om dose guidance	2021-12-09
20615	https://accpjournals.onlinelibrary.wiley.com/doi/full/10.1002/jac5.1415	Pharmacist-led phone call initiative targeting hemoglobin A1c levels in patients with uncontrolled diabetes	2021	Relevant	Undersøger forskellige telemedicine intitiver, hvoraf nogen modtager titrationshjælp.	2021-12-09
20617	https://ieeexplore.ieee.org/document/9422128	Nonlaboratory-Based Risk Assessment Model for Type 2 Diabetes Mellitus Screening in Chinese Rural Population: A Joint Bagging-Boosting Model	2021	Irrelevant	handler om risk assessment af hvorvidt personer bør screenes for diabetes. Noget ift. at kunne igangsætte præventive interventioner.	2021-12-09
20619	https://journals.sagepub.com/doi/full/10.1177/1060028020985111	The Role of Sodium-Glucose Cotransporter-2 Inhibitors in Patients With Heart Failure, Regardless of Diabetes Status: Focus on Cardiovascular Disease	2021	Irrelevant	handler ikke om dose guidance	2021-12-09
20624	https://onlinelibrary.wiley.com/doi/full/10.1111/1753-0407.13188	Emerging technologies for the management of type 2 diabetes mellitus	2021	Irrelevant	review	2021-12-09
20626	https://drc.bmj.com/content/9/1/e002320.abstract	Mentored implementation to initiate a diabetes program in an underserved community: A pilot study	2021	Relevant	I tvivl om det lever op til inkluionskritirerne eller ej.	2021-09-10
20627	https://www.ncbi.nlm.nih.gov/pmc/articles/PMC8380766/	Adapting Medication for Type 2 Diabetes to a Low Carbohydrate Diet	2021	Irrelevant	review	2021-09-10
20629	https://www.mdpi.com/1660-4601/18/15/7758	Adjustment for Baseline Covariates to Increase Efficiency in RCTs with Binary Endpoint: A Comparison of Bayesian and Frequentist Approaches	2021	Irrelevant	handler ikke om dose guidance	2021-09-10
20630	https://www.jhep-reports.eu/article/S2589-5559(21)00074-4/fulltext	External validation of LCR1-LCR2, a multivariable HCC risk calculator, in patients with chronic HCV	2021	Irrelevant	Handler om HCV og ikke primært diabetes.	2021-09-10
20631	https://dom-pubs-onlinelibrary-wiley-com.zorac.aub.aau.dk/doi/full/10.1111/dom.14413	Distribution patterns of intramyocellular and extramyocellular fat by magnetic resonance imaging in subjects with diabetes, prediabetes and normoglycaemic controls	2021	Irrelevant	handler ikke om dose guidance	2021-09-10
20634	https://link-springer-com.zorac.aub.aau.dk/article/10.1007/s13300-021-01095-x	Impact of a Remote Monitoring Programme Including Lifestyle Education Software in Type 2 Diabetes: Results of the Educ@dom Randomised Multicentre Study	2021	Relevant	Et telemedicinsk uddannelses system til diabetikere.	2021-09-10
20635		Ethnicity-specific BMI cutoffs for obesity based on type 2 diabetes risk in England: a population-based cohort study	2021	Irrelevant	Sørger at finde en etnicitet-specifik BMI cut-off værdi til at identificere person at-risk for type 2 diabetes.	2021-09-10
20636	https://link-springer-com.zorac.aub.aau.dk/article/10.1007/s12325-021-01748-0	Practical Approaches to Treating Obesity: Patient and Healthcare Professional Perspectives	2021	Irrelevant	Handler om hvordan HCP'er kan initiere samtaler med patienter omkring overvægt.	2021-09-10
20637	https://link-springer-com.zorac.aub.aau.dk/article/10.1007/s00125-021-05429-z	Postpartum circulating microRNA enhances prediction of future type 2 diabetes in women with previous gestational diabetes	2021	Irrelevant	handler om postpartum type 2 diabetes risiko stratificering af kvinder.	2021-09-10
20638	https://academic-oup-com.zorac.aub.aau.dk/jcem/article/106/6/1761/6132446	HDL Particle Subspecies and Their Association with Incident Type 2 Diabetes: The PREVEND Study	2021	Irrelevant	handler ikke om dose guidance	2021-09-10
20639	https://link-springer-com.zorac.aub.aau.dk/article/10.1007/s00125-021-05409-3	Productivity-adjusted life years lost due to type 2 diabetes in Germany in 2020 and 2040	2021	Irrelevant	handler om estimering af tabte produktivitets år blandt personer med type 2 diabetes	2021-09-10
20648	https://academic-oup-com.zorac.aub.aau.dk/ajhp/article/78/7/556/6044728	Management of type 2 diabetes with oral semaglutide: Practical guidance for pharmacists	2021	Irrelevant	handler ikke om insulin, men orale antidiabetika.	2021-09-10
20649	https://www-nature-com.zorac.aub.aau.dk/articles/s41440-020-00569-y	Management of hyperkalemia during treatment with mineralocorticoid receptor blockers: findings from esaxerenone	2021	Irrelevant	review	2021-09-10
20650	http://www.aimspress.com/article/doi/10.3934/mbe.2021135	A Clinical Decision Support System based on fuzzy rules and classification algorithms for monitoring the physiological parameters of type-2 diabetic patients	2021	Relevant	Handler om udvikling af et fuzzy logic algoritme, men jeg kan ikke læse af titel eller absract hvorvidt det yder hjælp til dose guidance.	2021-09-10
20651	https://www.sciencedirect.com/science/article/pii/S1001929421000183	Association Analysis of Hyperlipidemia with the 28-Day All-Cause Mortality of COVID-19 in Hospitalized Patients	2021	Irrelevant	Hanlder om covid-19 prædiktorer for indlæggelse.	2021-09-10
20652	https://onlinelibrary-wiley-com.zorac.aub.aau.dk/doi/full/10.1111/imj.15245	Managing inpatient hyperglycaemia and initiating sodium-glucose cotransporter 2 inhibitor therapy in the setting of diabetes and acute coronary syndrome	2021	Irrelevant	handler ikke om insulin, men orale antidiabetika.	2021-09-10
20653	https://www-sciencedirect-com.zorac.aub.aau.dk/science/article/pii/S0168822721000541?via%3Dihub	The effect of a structured clinical algorithm on glycemic control in patients with combined tuberculosis and diabetes in Indonesia: A randomized trial	2021	Relevant	handler om dose guidance blandt andet, men har fokus på patienter med type 2 diabetes og tuberculose.	2021-09-10
20655	https://www-sciencedirect-com.zorac.aub.aau.dk/science/article/pii/S0146280620302127?via%3Dihub	Changing Fields-Diabetes Medications Invading the Cardiovascular Space	2021	Irrelevant	review	2021-09-10
20657	https://www.frontiersin.org/articles/10.3389/fgene.2021.632385/full	An Improved Genome-Wide Polygenic Score Model for Predicting the Risk of Type 2 Diabetes	2021	Irrelevant	Prædikterer risiko for type 2 diabetes.	2021-09-10
20658	https://academic-oup-com.zorac.aub.aau.dk/jamia/article/28/2/261/5961443	Integrating family and friend support, information technology, and diabetes education in community-centric diabetes self-management	2021	Relevant	En form for telemedicine, men uvist om der er et element af dose guidance.	2021-09-10
20659	https://www.ncbi.nlm.nih.gov/pmc/articles/PMC7943340/	A web-based computer-tailored program to improve treatment adherence in patients with type 2 diabetes: Randomized controlled trial	2021	Irrelevant	handler om adherence	2021-09-10
20660	https://www.ncbi.nlm.nih.gov/pmc/articles/PMC7946585/	A novel user utility score for diabetes management using tailored mobile coaching: Secondary analysis of a randomized controlled trial	2021	Relevant	I tvivl om det lever op til inkluionskritirerne eller ej.	2021-09-10
20661	https://onlinelibrary-wiley-com.zorac.aub.aau.dk/doi/10.1111/ijcp.13731	Switching between GLP-1 receptor agonists in clinical practice: Expert consensus and practical guidance	2021	Irrelevant	expert opinion	2021-09-10
20662	https://www-sciencedirect-com.zorac.aub.aau.dk/science/article/pii/S0168822720307889?via%3Dihub	Metformin dosage patterns in type 2 diabetes patients in a real-world setting in the United States	2021	Irrelevant	handler om dosering af metformin	2021-09-10
20671	https://www.dovepress.com/risk-of-thyroid-cancer-associated-with-use-of-liraglutide-and-other-an-peer-reviewed-fulltext-article-DMSO	Risk of thyroid cancer associated with use of liraglutide and other antidiabetic drugs in a us commercially insured population	2021	Irrelevant	handler ikke om dose guidance	2021-09-10
20674	https://www.ahajournals.org/doi/full/10.1161/ATVBAHA.121.315896?casa_token=YgvUs_QdqeQAAAAA%3Ay4D8En2iEzGWWUR9sii7VIPcvQI_phUb-N3eNzyyYAzZBElp9cISsZq7dh-y_FaBX6fba5-ZVqE99C34	Novel Lesional Transcriptional Signature Separates Atherosclerosis with and without Diabetes in Yorkshire Swine and Humans	2021	Irrelevant	handler ikke om dose guidance	2021-09-10
20676	https://www.dovepress.com/the-clinical-value-of-the-ra-adjusted-fracture-risk-assessment-tool-in-peer-reviewed-fulltext-article-IJGM	The clinical value of the ra-adjusted fracture risk assessment tool in the fracture risk prediction of patients with type 2 diabetes mellitus in China	2021	Irrelevant	Hanlder om type 2 diabetes og fracture risk	2021-09-10
20678	https://www.liebertpub.com/doi/full/10.1089/tmj.2019.0280	Racial Disparities in Diabetes Management Outcomes: Evidence from a Remote Patient Monitoring Program for Type 2 Diabetic Patients	2021	Relevant	De beskriver ikke i titel eller absract hvad remote patient monitoring og coaching program dækker over, så fuldtekst læsning er nødvendig.	2021-09-10
20679		Plasma metabolites associated with exposure to perfluoroalkyl substances and risk of type 2 diabetes – A nested case-control study	2021	Irrelevant	case contorl study + handler ikke om dose guidance.	2021-09-10
21658	https://link-springer-com.zorac.aub.aau.dk/article/10.1007/s00198-021-06052-9	Lifetime risks of hip fracture in patients with type 2 diabetic: Taiwan Diabetes Study	2021	Irrelevant	etimering a life-time risk for hofte fraktur blandt type 2 diabetikere.	2021-09-10
21660	https://link-springer-com.zorac.aub.aau.dk/article/10.1186/s12933-021-01373-9	External applicability of SGLT2 inhibitor cardiovascular outcome trials to patients with type 2 diabetes and cardiovascular disease	2021	Irrelevant	handler ikke om dose guidance	2021-09-10
21662	https://www-sciencedirect-com.zorac.aub.aau.dk/science/article/pii/S221462372100017X?via%3Dihub	Association between hyperglycemia treatment and mortality in patients with diabetes and COVID-19 in a Peruvian hospital: A retrospective cohort study	2021	Irrelevant	handler om undersøgelse af sammenhængen mellem hyperglykæmisk behandling og dødlighed ved patienter med diabetes og covid-119.	2021-09-10
21663	https://onlinelibrary.wiley.com/doi/full/10.1111/jdi.13533	Simplification of complex insulin regimens using canagliflozin or liraglutide in patients with well-controlled type 2 diabetes: A 24-week randomized controlled trial	2021	Irrelevant	handler ikke om dose guidance	2021-09-10
21665		Effects of a low carbohydrate intervention with nutritional ketosis on liver markers: A real-world experience	2021	Irrelevant	handler ikke om dose guidance	2021-09-10
21666		Complications of type 2 diabetes are associated with liver fibrosis by fibrosis-4 index	2021	Irrelevant	handler ikke om dose guidance	2021-09-10
21667		Factors associated with liver marker resolution in patients with type 2 diabetes receiving a very low carbohydrate intervention	2021	Irrelevant	handler ikke om dose guidance	2021-09-10
21668		Sequential Multiple Assignment Randomized Trial (SMART) to identify optimal sequences of telemedicine interventions for improving initiation of insulin therapy: A simulation study	2021	Relevant	Handler om titration, men fokus er sammenlign af et studiedesign med RCT	2021-09-10
21669	https://www-liebertpub-com.zorac.aub.aau.dk/doi/10.1089/dia.2021.0144	Not all type-2-diabetes patients increase BMI after initiating insulin - Results of latent class analysis from the DPV registry	2021	Irrelevant	handler om hvorvidt insulin initiering og stigning i BMI er forbundet	2021-09-10
21670	https://bmjopen-bmj-com.zorac.aub.aau.dk/content/11/9/e051549	Cardiovascular morbidity and mortality in patients with type 2 diabetes using novel antidiabetic medicines as add-on therapy: An observational real-world study	2021	Irrelevant	handler ikke om dose guidance	2021-09-10
21671		Inequalities in glycemic management in people living with type 2 diabetes mellitus and severe mental illnesses: Cohort study from the UK over 10 years	2021	Irrelevant	handler ikke om dose guidance	2021-09-10
21673	https://link-springer-com.zorac.aub.aau.dk/article/10.1007/s13300-021-01112-z	Effect of Baseline Characteristics on Hypoglycaemia Risk with Insulin Glargine 100 U/mL: Post Hoc Analysis of the BEYOND 7 Study; Sanofi Aventis(Germany	2021	Relevant	undersøger sikkerheden af en højere start dosis ved titrering.	2021-09-10
21674		Glucagon-Like Peptide 1 Receptor Agonist Usage in Type 2 Diabetes in Primary Care for the UK and Beyond: A Narrative Review	2021	Irrelevant	review	2021-09-10
21675		Risk factor (RF) identification (ID) and hyperglycemia (HG) prevention with alpelisib (ALP) + fulvestrant (FLV) in PIK3CA-mutated, hormone-receptor positive (HR+), human epidermal growth factor-2 negative (HER2-) advanced breast cancer (ABC)	2021	Irrelevant	handler ikke om dose guidance	2021-09-10
21676	https://www-sciencedirect-com.zorac.aub.aau.dk/science/article/pii/S0140673621014434?via%3Dihub	Once-weekly tirzepatide versus once-daily insulin degludec as add-on to metformin with or without SGLT2 inhibitors in patients with type 2 diabetes (SURPASS-3): a randomised, open-label, parallel-group, phase 3 trial; Novo Nordisk(Denmark); Lilly(United States)	2021	Irrelevant	sammenligner virkning af et oralt antidiabetika og basal insulin	2021-09-10
21678		Hemoglobin A1c-levels and subsequent risk of depression in individuals with and without diabetes	2021	Irrelevant	handler om HbA1c og risiko for depression.	2021-09-10
21679		Validation of acute outcomes among patients with type 2 diabetes mellitus in the Clinical Practice Research Datalink	2021	Irrelevant	undersøger sikkerhed af titrering af andet end insulin	2021-09-10
21680		The role of propensity score matching in claims-based studies for achieving comparability in HbA1c levels between treatments in pregnant women with type 2 diabetes	2021	Irrelevant	handler gestristional diabetes	2021-09-10
21682		Cost–Utility Analysis of Dapagliflozin as an Add-On to Standard Treatment for Patients with Type 2 Diabetes and High Risk of Cardiovascular Disease in Thailand	2021	Irrelevant	lifetime cost for diabetikere	2021-09-10
21684	https://jamanetwork-com.zorac.aub.aau.dk/journals/jama/fullarticle/2780594	Association of Real-time Continuous Glucose Monitoring with Glycemic Control and Acute Metabolic Events among Patients with Insulin-Treated Diabetes	2021	Irrelevant	Initiering af CGM	2021-09-10
21685	https://link-springer-com.zorac.aub.aau.dk/article/10.1007/s10389-019-01182-1	Should we care to adhere? Guideline adherence rates, glycemic control and physician perspective on adherence for type-2 diabetes	2021	Irrelevant	handler om adherence	2021-09-10
21686		PDB16 Cost-Effectiveness of ADD-on Therapies to Metformin: The IMPACT of Medication Adherence for Type 2 Diabetes Mellitus	2021	Irrelevant	handler om adherence	2021-09-10
21687		Insulin Pulse Characteristics and Insulin Action in Non-diabetic Humans	2021	Irrelevant	handler ikke om type 2 diabetikere	2021-09-10
21688		Similar hypoglycemia duration with once-weekly insulin icodec vs. insulin glargine u100 in insulin naïve or experienced patients with T2D	2021	Irrelevant	handler ikke om dose guidance	2021-09-10
21689		Glycemic control with once-weekly basal insulin fc (BIF) in persons with type 2 diabetes mellitus (T2DM) using continuous glucose monitoring (CGM) in a phase 2 study	2021	Irrelevant	sammenligner to basal insuliners virkning	2021-09-10
21690		Real-life efficacy and safety of ideglira in type 2 diabetic patients during COVID-19: A 6-month follow-up by teleconsultation in bucaramanga, colombia	2021	Irrelevant	handler ikke om dose guidance	2021-09-10
21691		A retrospective nationwide surveillance on the first-line antidiabetic medication for the patients with type 2 diabetes in Japan	2021	Irrelevant	undersøger tends ved udskrivelse af non-insulin antidiabetika.	2021-09-10
21692		Association of an integrated component of maternal glycemic regulation in pregnancy with epigenome-wide cord blood dna methylation	2021	Irrelevant	handler om abnormal glukose niveau hos gravide.	2021-09-10
21693	https://diabetes.diabetesjournals.org/content/70/Supplement_1/624-P	Sustained effect in diabetes management using a digital workflow and decision support system in home health care	2021	Relevant	handler om et DSS med basal og basal-bolus insulin algoritmer	2021-09-10
21694		Efficacy and safety of insulin glargine 300 U/mL (Gla-300) in people with type 2 diabetes mellitus (T2DM) uncontrolled on basal insulins (BI): ARTEMIS-DM study	2021	Irrelevant	Undersøger ikke dose guidance	2021-09-10
21695	https://diabetes.diabetesjournals.org/content/70/Supplement_1/95-LB	Lixilanone CAN: Randomized trial comparing a daily vs. Weekly titration algorithm for switching from basal insulin to iglarlixi fixed-ratio combination in people with T2DM in Canada	2021	Relevant	sammenligner to titreringsalgoritmer	2021-09-10
21696		Evaluation of Consistency of Treatment Response Across Regions—the LEADER Trial in Relation to the ICH E17 Guideline	2021	Irrelevant	handler ikke om dose guidance	2021-09-10
21697		Effect of type 1 diabetes and type 2 diabetes on the risk of venous thromboembolism	2021	Irrelevant	handler ikke om dose guidance	2021-09-10
21698		Association of beta-hydroxybutyrate with development of heart failure: Sex differences in a Dutch population cohort	2021	Irrelevant	Undersøger noget med hjertet	2021-09-10
21703		The cost-effectiveness of dapagliflozin compared to DPP-4 inhibitors in the treatment of type 2 diabetes mellitus in the Netherlands	2021	Irrelevant	Cost-effect analyse of tilføjdelse af en oral diabetika	2021-09-10
21704		Type 2 diabetes clusters indicate diabetes duration key in fracture risk	2021	Irrelevant	Ser på fraktur risiko blandt type 2 diabetikere.	2021-09-10
21705		Cost-effectiveness of oral semaglutide added to current antihyperglycemic treatment for type 2 diabetes	2021	Irrelevant	Ser på risikoen for kadiovaskulær sygdomme ved tilføjelse af semaglutide til exiterende behandling	2021-09-10
21707		Rapid rise in insulin requirements of inpatients with covid-19 given dexamethasone: Adaptations of the national guidelines to local needs	2021	Irrelevant	ser på forværring under indlæggelse af type 2 diabetikere med covid-19	2021-09-10
21708		Snapshot audit of glucose monitoring for people with covid-19 recently started on dexamethasone (including people with diabetes (PWD) and without diabetes (PWOD))	2021	Irrelevant	handler ikke om dose guidance	2021-09-10
21709		Heterogeneous Treatment Effects on Cardiovascular Diseases With Dipeptidyl Peptidase-4 Inhibitors Versus Sulfonylureas in Type 2 Diabetes Patients	2021	Irrelevant	handler ikke om dose guidance	2021-09-10
21711		Natural Killer Cells: Friend or Foe in Metabolic Diseases?	2021	Irrelevant	handler ikke om dose guidance	2021-09-10
21713		Use of Real-World Data to Emulate a Clinical Trial and Support Regulatory Decision Making: Assessing the Impact of Temporality, Comparator Choice, and Method of Adjustment	2021	Irrelevant	handler ikke om dose guidance	2021-09-10
21714		Cost-Effectiveness of the New 2018 American College of Physicians Glycemic Control Guidance Statements Among US Adults With Type 2 Diabetes	2021	Irrelevant	handler ikke om dose guidance	2021-09-10
21715		Dipeptidyl peptidase-4 inhibitors may accelerate cirrhosis decompensation in patients with diabetes and liver cirrhosis: a nationwide population-based cohort study in Taiwan	2021	Irrelevant	e evaluate the risk of mortality, cardiovascular events, and hepatic outcomes between dipeptidyl peptidase-4 (DPP-4) inhibitor users and nonusers in patients with type 2 diabetes mellitus (T2DM) and cirrhosis	2021-09-10
21716		Hepatic and cardiovascular safety of acarbose among type 2 diabetes patients with end-stage renal disease: A nationwide population-based longitudinal study	2021	Irrelevant	To assess the relationship between acarbose and hepatotoxicity, cardiovascular disease (CVD), and mortality among type 2 diabetes (T2D) patients with end-stage renal disease (ESRD)	2021-09-10
21717		Population attributable risk of excess weight, abdominal obesity and physical inactivity for type 2 diabetes in Chinese men and women	2021	Irrelevant	it is necessary to estimate the T2DM incident attributable to obesity and physical inactivity	2021-09-10
21718		Cancer signaling transcriptome is upregulated in type 2 diabetes mellitus	2021	Irrelevant	We aimed to explore the differences in the whole transcriptome of peripheral blood mononu-clear cells between elderly individuals with and without type 2 diabetes (T2D)	2021-09-10
21720		White blood cell count as a predictor of incident type 2 diabetes mellitus among non-obese adults: A longitudinal 10-year analysis of the korean genome and epidemiology study	2021	Irrelevant	This study aimed to determine whether WBC count could be used as an indicator for the prediction of incident T2DM among non-obese individuals using a large, community-based Korean cohort that was observed	2021-09-10
21721		Characteristics and treatment patterns of patients with type 2 diabetes in lebanon: The discover study	2021	Irrelevant	The aim of this study is to describe real-world clinical practice in terms of type 2 diabetes mellitus (T2DM) disease management and treatment patterns within Lebanon.	2021-09-10
21723		Clinical management of Type II Diabetes among the unstably housed: A qualitative study of primary care physicians	2021	Irrelevant	To examine how primary care clinicians perceive and navigate their patients' housing challenges in the context ofType II Diabetes management	2021-09-10
21724		Effectiveness and safety of insulin glargine Gla-300 in insulin-naïve type 2 diabetes subjects in a real-life setting— The GOAL_RO trial	2021	Relevant	The aim of our study was to assess on a large cohort of insulin-naïve T2DM subjects the effectiveness and safety of insulin glargine 300 U/mL (Gla-300) in a real-life setting	2021-09-10
21727	https://journals-sagepub-com.zorac.aub.aau.dk/doi/full/10.1177/19322968211026626	Simulation-Based Evaluation of Dose Titration Algorithms for U-500R Insulin by Pump in Subjects with Type 2 Diabetes	2021	Irrelevant	In this study, we adopted a mechanistic modeling2 and simulation approach to evaluate alternative parameters in the U-500R insulin titration algorithm for the CSII arm of the VIVID study. Our goal was to determine which parameter(s) in the algorithm could mitigate the nocturnal hypoglycaemia without sacrificing efficacy observed in the trial.	2021-09-10
21730		Fasting Glucose of 6.1 mmol/L as a Possible Optimal Target for Type 2 Diabetic Patients with Insulin Glargine: A Randomized Clinical Trial	2021	Relevant	To observe whether different insulin glargine titration algorithms based on fasting blood glucose (FBG) levels lead to different glycaemic variations (GVs) in type 2 diabetes (T2D) patients,	2021-09-10
21731		Comparisons of efficacy and safety in insulin glargine and lixisenatide plus glulisine combination therapy with multiple daily injection therapy in Japanese patients with type 2 diabetes	2021	Irrelevant	This study aimed to compare the efficacy (time in range of glucose level 70–180 mg/dL), safety (time below range level 1 of glucose <70 mg/dL), glycemic variability changes, therapeutic indices, body mass index and titration periods between multiple daily injection and insulin glargine U100 and lixisenatide (iGlarLixi) combination (iGlarLixi + insulin glulisine; injected once daily evenings]) the…	2021-09-10
21733		Perioperative Management of Diabetes in an Acute Hospital Pre-implementation of Formal Guidelines	2021	Irrelevant	This audit investigated the perioperative management of patients with diabetes in a hospital without institutionally accepted guidance	2021-09-10
21734		Significant a1c decrease for patients with type 1 & type 2 diabetes treated via telemedicine with the mydiabby healthcare software	2021	Relevant	The goal of our study is to evaluate patients' A1c in order to analyse the impact of the ETAPES telemedicine trial on their glycemic control.	2021-09-10
21734		A computer software for suggesting glucose infusion rate in glucose clamp experiments	2021	Relevant	We developed a software for GIR suggestion in glucose clamps designed to improve the quality and safety in such experiments.	2021-09-10
23292		Prospective study of a diabetes risk reduction diet and the risk of breast cancer	2020	Irrelevant	We prospectively evaluated the association between adherence to a DRRD and the incidence of breast cancer.	2021-09-10
23266		Course of body weight before and after the initiation of insulin therapy in type 2 diabetes mellitus: Retrospective inception cohort study (ZODIAC 58)	2020	Irrelevant	he aim of this study was to explore the effect of insulin treatment initiation on weight by taking weight change prior to initiation into account.	2021-09-10
23285		Bariatric surgery for patients with type 2 diabetes mellitus requiring insulin: Clinical outcome and cost-effectiveness analyses	2020	Irrelevant	The aims of this study were to examine the impact of bariatric surgery on T2DM resolution in patients with obesity and T2DM requiring insulin (T2DM-Ins) using data from a national database and to develop a health economic model to evaluate the cost-effectiveness of surgery in this cohort when compared to best medical treatment	2021-09-10
23286		Intensification of Gla-100 with Prandial Insulin: A Stepwise Progression Toward Glycemic Control	2020	Irrelevant	Handler om basal-bolus regime	2021-09-10
23287		Basal Insulin Titration: Moving Towards a More Patient-Centric Approach with Gla-100 in India	2020	Relevant	Lyder relevant men tvivlsomt om studiedesignet.	2021-09-10
23290		Diuretics and risk of lower extremity amputation amongst patients with insulin-treated type 2 diabetes - exploring the mechanism of possible sodium glucose co-transporter 2 inhibitor induced risk of lower extremity amputations	2020	Irrelevant	We investigated the potential association between diuretics use and the LEA risk in insulin-treated T2D patients.	2021-09-10
23293	https://www-sciencedirect-com.zorac.aub.aau.dk/science/article/pii/S0168822720307312?via%3Dihub	Titratable fixed-ratio combination of insulin glargine plus lixisenatide: A simplified approach to glycemic control in type 2 diabetes mellitus	2020	Irrelevant	anvender GLP-1 RA i kombination med basal insulin. Det bryder med inklusionkritirerne, som kun vil acceptere basal i kobination med orale antidiabetika.	2021-09-10
23297		Total and added sugar intakes, sugar types, and cancer risk: results from the prospective NutriNet-Santé cohort	2020	Irrelevant	The objective was to study the associations between total and added sugar intake and cancer risk (overall, breast, and prostate), taking into account sugar types and sources	2021-09-10
23288		Association of the Mediterranean Diet With Onset of Diabetes in the Women's Health Study	2020	Irrelevant	To characterize the relative contribution of conventional and novel biomarkers in MED-associated type 2 diabetes risk reduction in a US population	2021-09-10
23279		Evaluation of synergistic combination comprising magnesium orotate, menaquinone-7, and cholecalciferol for management of type 2 diabetes and dyslipidemia	2020	Irrelevant	handler ikke om dose guidance	2021-09-10
23289		Assessment of basal insulin adherence using 2 methodologies among Texas Medicaid enrollees with type 2 diabetes	2020	Irrelevant	To examine the unadjusted and adjusted associations between basal insulin type and adherence to basal insulin using MPR and aMPR	2021-09-10
23295		Reducing HbA1c in Type 2 Diabetes Using Digital Twin Technology-Enabled Precision Nutrition: A Retrospective Analysis	2020	Irrelevant	handler ikke om dose guidance	2021-09-10
23304		Integrating oral semaglutide into clinical practice in primary care: for whom, when, and how?	2020	Irrelevant	handler ikke om dose guidance	2021-12-11
23306		Real-world cost-effectiveness of insulin degludec in type 1 and type 2 diabetes mellitus from a Swedish 1-year and long-term perspective	2020	Irrelevant	handler ikke om dose guidance	2021-12-11
23313		Association between sleep duration and mortality risk among adults with type 2 diabetes: a prospective cohort study	2020	Irrelevant	handler ikke om dose guidance	2021-12-11
23291		PromarkerD Predicts Renal Function Decline in Type 2 Diabetes in the Canagliflozin Cardiovascular Assessment Study (CANVAS)	2020	Irrelevant	handler ikke om dose guidance	2021-12-11
23303		Management of Latent Autoimmune Diabetes in Adults: A Consensus Statement From an International Expert Panel	2020	Irrelevant	expert opinion	2021-12-11
23305		Risk of Anemia With Metformin Use in Type 2 Diabetes: A MASTERMIND Study	2020	Irrelevant	To evaluate the association between metformin use and anemia risk in type 2 diabetes	2021-12-11
23308		Severe hypoglycaemia and absolute risk of cause-specific mortality in individuals with type 2 diabetes: a UK primary care observational study	2020	Irrelevant	handler ikke om dose guidance	2021-12-11
23368		Costarting sitagliptin with metformin is associated with a lower likelihood of disease progression in newly treated people with type 2 diabetes: a cohort study	2020	Irrelevant	To examine whether early addition of sitagliptin to metformin is associated with a delay in type 2 diabetes progression	2021-12-11
23296		Cost-Effectiveness of a Continuous Glucose Monitoring Mobile App for Patients With Type 2 Diabetes Mellitus: Analysis Simulation	2020	Irrelevant	handler ikke om dose guidance	2021-12-11
23312		Identification of Type 2 Diabetes Management Mobile App Features and Engagement Strategies: Modified Delphi Approach	2020	Irrelevant	Lyder måske relevant men kan ikke vurdere hvorvidt det handler om dose guidance	2021-12-11
23294		Serum Transferrin Predicts New-Onset Type 2 Diabetes in Koreans: A 4-Year Retrospective Longitudinal Study	2020	Irrelevant	Thus, we investigated the association between transferrin and incident type 2 diabetes.	2021-12-11
23298		Comparison of weight-based insulin titration (WIT) and glucose-based insulin titration using basal-bolus algorithm in hospitalized patients with type 2 diabetes: a multicenter, randomized, clinical study	2020	Irrelevant	This study aimed to compare the effectiveness and safety of a weight-based insulin titration algorithm versus glucose-based algorithm in hospitalized patients with type 2 diabetes mellitus (T2DM). Basal-bolus regime	2021-12-11
23302		The Association Between Adherence to Insulin Therapy and Health Care Costs for Adults with Type 2 Diabetes: Evidence from a U.S. Retrospective Claims Database	2020	Irrelevant	To examine the association between adherence to insulin therapy and all-cause health care costs for patients with T2D.	2021-12-11
23311		The Prevalence and Risk of Type 2 Diabetes in Adults with Disabilities in Korea	2020	Irrelevant	The aim of this study was to evaluate the prevalence and risk of type 2 diabetes in South Korea, especially among people with all types of disabilities	2021-12-11
23363		Circulating omega-7 fatty acids are differentially related to metabolic dysfunction and incident type II diabetes: The Multi-Ethnic Study of Atherosclerosis (MESA)	2020	Irrelevant	Determine whether plasma omega-7 vaccenic acid and palmitoleic acid levels are related to homeostasis model of insulin resistance scores and incident type II diabetes, and whether race/ethnicity modifies these associations	2021-12-11
23390		In Silico Examination of Initiation of Long-Acting Insulin Analogs Toujeo Compared to Lantus Under 3 Dosing Titration Rules in Virtual Type 2 Diabetes Subjects	2020	Relevant	The primary objective for this in silico study was to examine the effectiveness of 3 dose TAs (1-3) for optimization of basal insulin glargine (Gla-100 and Gla-300).	2021-12-11
23394		Association between specific plasma ceramides and high-sensitivity C-reactive protein levels in postmenopausal women with type 2 diabetes	2020	Irrelevant	handler ikke om dose guidance	2021-12-11
23307		A surrogate of Roux-en-Y gastric bypass (the enterogastro anastomosis surgery) regulates multiple beta-cell pathways during resolution of diabetes in ob/ob mice	2020	Irrelevant	dyre studie	2021-12-11
23327		Budget impact analysis for dapagliflozin in type 2 diabetes in Egypt	2020	Irrelevant	This study evaluated the budget impact and the long-term consequences of dapagliflozin versus other conventional medications, as monotherapy, from both the societal and health insurance perspectives in Egypt	2021-12-11
23338		Changes in incidence of severe hypoglycaemia in people with type 2 diabetes from 2006 to 2016: analysis based on health insurance data in Germany considering the anti-hyperglycaemic medication	2020	Irrelevant	To investigate the incidence of severe hypoglycaemia over the past 10 years, taking into account changes in anti-hyperglycaemic therapy.	2021-12-11
23309		Mathematical model of blood glucose dynamics by emulating the pathophysiology of glucose metabolism in type 2 diabetes mellitus	2020	Relevant	Lyder måske relevant men kan ikke vurdere hvorvidt det handler om dose guidance	2021-12-11
23326		Suppression of Endothelial AGO1 Promotes Adipose Tissue Browning and Improves Metabolic Dysfunction	2020	Irrelevant	handler ikke om dose guidance	2021-12-11
23310		Polyvalent therapeutic vaccine for type 2 diabetes mellitus: Immunoinformatics approach to study co-stimulation of cytokines and GLUT1 receptors	2020	Irrelevant	handler ikke om dose guidance	2021-12-11
23282		Cost-effectiveness of Interventions to Manage Diabetes: Has the Evidence Changed Since 2008?	2020	Irrelevant	systematic literature review	2021-12-11
23315		Efficacy and safety of patient-led versus physician-led titration of basal insulin in patients with uncontrolled type 2 diabetes: a meta-analysis of randomized controlled trials	2020	Irrelevant	systematic literature review	2021-12-11
23318		Use of Traditional Chinese Medicine May Delay the Need for Insulin Treatment in Patients with Type 2 Diabetes: A Population-Based Cohort Study	2020	Irrelevant	The aim of this study was to assess whether the use of TCM can delay the need for insulin therapy in patients with type 2 diabetes.	2021-12-11
23321		Clinical Characteristics and Outcomes of Patients With Diabetes and COVID-19 in Association With Glucose-Lowering Medication	2020	Irrelevant	Diabetes is one of the most distinct comorbidities of COVID-19. Here, we describe the clinical characteristics of and outcomes in patients with diabetes in whom COVID-19 was confirmed or clinically diagnosed (with typical features on lung imaging and symptoms) and their association with glucose-lowering or blood pressure-lowering medications.	2021-12-11
23301		Diabetes Telehealth Solutions: Improving Self-Management Through Remote Initiation of Continuous Glucose Monitoring	2020	Irrelevant	The purpose of this study was to evaluate feasibility of initiating continuous glucose monitoring (CGM) through telehealth as a means of expanding access	2021-12-11
23317		Pioglitazone for primary stroke prevention in Asian patients with type 2 diabetes and cardiovascular risk factors: a retrospective study	2020	Irrelevant	hus, we aimed to assess the effect of pioglitazone on primary stroke prevention in Asian patients with type 2 DM without established CV diseases but with risk factors for CV diseases	2021-12-11
23319		Comparative cardiovascular safety of GLP-1 receptor agonists versus other glucose-lowering agents in real-world patients with type 2 diabetes: a nationwide population-based cohort study	2020	Irrelevant	This study aimed to investigate the comparative cardiovascular safety of GLP-1ra in comparisons with dipeptidyl peptidase-4 inhibitor (DPP-4i), sulfonylurea (SU), and insulin in a real-world population with T2D.	2021-12-11
23320		High variability in bodyweight is associated with an increased risk of atrial fibrillation in patients with type 2 diabetes mellitus: a nationwide cohort study	2020	Irrelevant	We aimed to examine the relationship between bodyweight variability and the risk of AF in patients with type 2 diabetes mellitus (DM), and whether this relationship was affected by baseline body mass index (BMI), weight change, or advanced diabetic stage.	2021-12-11
23323		Cardiovascular outcome trials of glucose-lowering therapies	2020	Irrelevant	expert opinion	2021-12-11
23324		Managing Diabetes in Pregnancy Before, During, and After COVID-19	2020	Irrelevant	diabetes i gravide	2021-12-11
23328		Concentrated Insulins: Clinical Update of Therapeutic Options	2020	Irrelevant	expert opinion	2021-12-11
23333		Characterization of Signaling Pathways Associated with Pancreatic β-cell Adaptive Flexibility in Compensation of Obesity-linked Diabetes in db/db Mice	2020	Irrelevant	dyre studie	2021-12-11
23356		Circulating miR-135 May Serve as a Novel Co-biomarker of HbA1c in Type 2 Diabetes	2020	Irrelevant	biomarks for Hba1c	2021-12-11
23361		The effect of an mHealth intervention for titration of insulin for type 2 diabetes: A pilot study	2020	Relevant	This study trialled a smartphone application for sharing BGLs, with the ability to digitally transmit advice back to patients compared with their usual care. AIMS: The aim of this study was to compare desirability, efficiency and ease of use.	2021-12-11
23403		What will make patients use a patient decision aid? A qualitative study on patients' perspectives on implementation barriers and facilitators	2020	Irrelevant	This study aims to explore patients' views on the factors influencing implementation of an "insulin choice" PDA in a primary care setting	2021-12-11
23322		Patient Empowerment Using Electronic Telemonitoring With Telephone Support in the Transition to Insulin Therapy in Adults With Type 2 Diabetes: Observational, Pre-Post, Mixed Methods Study	2020	Relevant	This study aimed to evaluate the clinical effectiveness and feasibility and the patients' and health care providers' experiences of a 12-week telemonitoring intervention with telephone support for patients commencing insulin therapy.	2021-12-11
23332		Accelerated osteocyte senescence and skeletal fragility in mice with type 2 diabetes	2020	Irrelevant	dyre studie	2021-12-11
23329		Cost-Effectiveness of Insulin Degludec Versus Insulin Glargine U300 in the Netherlands: Evidence From a Randomised Controlled Trial	2020	Irrelevant	This study aimed to evaluate the short-term cost-effectiveness of insulin degludec 200 units/mL (degludec) versus insulin glargine 300 units/mL (glargine U300) from a Dutch societal perspective.	2021-12-11
23330		Evaluating the Long-Term Cost-Effectiveness of Once-Weekly Semaglutide Versus Once-Daily Liraglutide for the Treatment of Type 2 Diabetes in the UK	2020	Irrelevant	The present analysis aimed to evaluate the long-term cost-effectiveness of once-weekly semaglutide 1 mg versus once-daily liraglutide 1.2 mg from a UK healthcare payer perspective.	2021-12-11
23360		Association study of the single-nucleotide polymorphisms -3971G/A and +276G/T in the adiponectin gene with type 2 diabetes in a North Indian Punjabi population	2020	Irrelevant	To investigate the role of ADIPOQ gene variants (-3971G/A rs822396 and +276G/T rs1501299) with type 2 diabetes risk in a North Indian Punjabi population.	2021-12-11
23331		The Clinical Role of Insulin Degludec/Insulin Aspart in Type 2 Diabetes: An Empirical Perspective from Experience in Australia	2020	Irrelevant	Handler om basal-bolus regime	2021-12-11
23339		Efficacy and Safety of Basal Insulin-Based Treatment Versus Twice-Daily Premixed Insulin After Short-Term Intensive Insulin Therapy in Patients with Type 2 Diabetes Mellitus in China: Study Protocol for a Randomized Controlled Trial (BEYOND V)	2020	Irrelevant	This study will compare the efficacy and safety of basal insulin-based treatment versus twice-daily premixed insulin in type 2 diabetes mellitus (T2DM) patients after short-term in-hospital IIT	2021-12-11
23335		Muscle Strength and Glycaemic Control among Patients with Type 2 Diabetes	2020	Irrelevant	. This cross-sectional study examined whether there is an association between handgrip strength and glycaemic control among patients with diabetes.	2021-12-11
23337		Cultural adaptation of a patient decision-aid for insulin therapy	2020	Relevant	The study aimed to explore the views and perceptions of Singaporean primary care providers on the Malaysia PDA to initiate insulin therapy and described the cultural adaptation process used in the design and development of a new PDA, which would be trialled in a Singapore primary healthcare institution.	2021-12-11
23340		Metabolomics analyses in non-diabetic middle-aged individuals reveal metabolites impacting early glucose disturbances and insulin sensitivity	2020	Irrelevant	We aimed to identify plasma metabolites associated with different indices of early disturbances in glucose metabolism and insulin sensitivity	2021-12-11
23370		Insulin enhances and metformin reduces risk of colorectal carcinoma in type-2 diabetes	2020	Irrelevant	o investigate the association between use of insulin or metformin with colorectal cancer (CRC) in type 2 diabetes (T2DM)	2021-12-11
23334		Comparison of the Efficacy and Safety of Insulin Detemir Administered Once Daily According to Two Titration Algorithms (3-0-3 and 2-4-6-8) in Patients with Type 2 Diabetes Mellitus	2020	Relevant	This study was conducted to compare glycaemic control with insulin detemir administered according to two titration algorithms (3-0-3 and 2-4-6-8) after 20 weeks of treatment in subjects with type 2 diabetes mellitus inadequately controlled on metformin.	2021-12-11
23344		Best Practices and Tools for Titrating Basal Insulins: Expert Opinion from an Indian Panel via the Modified Delphi Consensus Method	2020	Irrelevant	expert opinion	2021-12-11
23354		Psychosocial aspects and contributions of behavioural science to medication-taking for adults with type 2 diabetes	2020	Irrelevant	review	2021-12-11
23365		Trend 2010-2018 in the clinical use of GLP-1 receptor agonists for the treatment of type 2 diabetes in routine clinical practice: an observational study from Northeast Italy	2020	Irrelevant	Several GLP-1 receptor agonists (GLP-1RA) have become available for the treatment of type 2 diabetes (T2D), and evidence on their beneficial effects has evolved. We evaluated how the clinical phenotype of patients initiating GLP-1RA changed from 2010 to 2018.	2021-12-11
23372		Cost-effectiveness of switching to insulin degludec from other basal insulins in real-world clinical practice in Italy	2020	Irrelevant	The aim of this study was to evaluate the cost-effectiveness of switching to insulin degludec (degludec) vs continuing previous basal insulin, in Italian patients with type 1 (T1D) or type 2 (T2D) diabetes, using a long-term economic model.	2021-12-11
23367		Mathematical model of diabetes and lipid metabolism linked to diet, leptin sensitivity, insulin sensitivity and VLDLTG clearance predicts paths to health and type II diabetes	2020	Irrelevant	handler ikke om dose guidance	2021-12-11
23343		Associations of Different Types of Maternal Diabetes and Body Mass Index With Offspring Psychiatric Disorders	2020	Irrelevant	To examine the associations of different types of maternal diabetes, separately and together with maternal obesity, with psychiatric disorders in the mothers' offspring.	2021-12-11
23325		Delay of insulin therapy in type 2 diabetics	2020	Irrelevant	handler ikke om dose guidance	2021-12-11
23336		Relationship between Free Thyroxine and Islet Beta-cell Function in Euthyroid Subjects	2020	Irrelevant	We aimed to investigate the association between euthyroid hormones and islet beta-cell function in general population and non-treated type 2 diabetes mellitus (T2DM) patients.	2021-12-11
23352		Association Between Hemoglobin A1c and Major Adverse Coronary Events in Patients with Diabetes Following Coronary Artery Bypass Surgery	2020	Irrelevant	handler ikke om dose guidance	2021-12-11
23357		Suppressive effects of metformin on colorectal adenoma incidence and malignant progression	2020	Irrelevant	We aimed to evaluate the role of metformin in the entire CRC linear progression	2021-12-11
23369		Circulatory miR-98-5p levels are deregulated during diabetes and it inhibits proliferation and promotes apoptosis by targeting PPP1R15B in keratinocytes	2020	Irrelevant	handler ikke om dose guidance	2021-12-11
23342		Enterotype Bacteroides Is Associated with a High Risk in Patients with Diabetes: A Pilot Study	2020	Irrelevant	handler ikke om dose guidance	2021-12-11
23341		The Correlation between Dietary Selenium Intake and Type 2 Diabetes: A Cross-Sectional Population-Based Study on North Chinese Adults	2020	Irrelevant	The present study aimed to investigate the significance of dietary Se and T2D in North Chinese adults.	2021-12-11
23349		Sex Differences in Cardiovascular Effectiveness of Newer Glucose-Lowering Drugs Added to Metformin in Type 2 Diabetes Mellitus	2020	Irrelevant	handler ikke om dose guidance	2021-12-11
23346		Comparison of Mortality and Major Cardiovascular Events Among Adults With Type 2 Diabetes Using Human vs Analogue Insulins	2020	Irrelevant	handler om human insulin	2021-12-11
23347		Mining treatment patterns of glucose-lowering medications for type 2 diabetes in the Netherlands	2020	Irrelevant	we aimed to describe treatment patterns of glucose-lowering medications in patients with T2DM in the Netherlands	2021-12-11
23366		Insulin Resistance in Healthy U.S. Adults: Findings from the National Health and Nutrition Examination Survey (NHANES)	2020	Irrelevant	handler ikke om dose guidance	2021-12-11
23382		Basal Insulin Analogs versus Neutral Protamine Hagedorn for Type 2 Diabetics	2020	Irrelevant	To determine whether basal insulin analogs reduce the rate of composite neonatal morbidity compared with neutral protamine Hagedorn (NPH) in women with type 2 diabetes mellitus (T2DM).	2021-12-11
23417		Effect of metformin on the risk of prostate cancer in patients with type 2 diabetes by considering different confounding factors: a meta-analysis of observational studies	2020	Irrelevant	We aim to investigate the evidence of metformin and the risk of prostate cancer. Meta analyse	2021-12-11
20681		Temporal Dietary Patterns Are Associated with Obesity in US Adults	2020	Irrelevant	handler ikke om dose guidance	2021-12-11
20684		Continuous glucose monitoring: The achievement of 100 years of innovation in diabetes technology	2020	Irrelevant	The purpose of this review is to present an overview of current CGM systems and provide guidance to clinicians for initiating and utilizing CGM in their practice settings.	11-12-2021 17-01-2022
20685		The burden of type 2 diabetes pre-and during the COVID-19 pandemic – a review	2020	Irrelevant	review	2021-12-11
20687		Options in Bariatric Surgery: Modeled Decision Analysis Supports One-Anastomosis Gastric Bypass as the Treatment of Choice when Type 2 Diabetes Is Present	2020	Irrelevant	handler ikke om dose guidance	2021-12-11
20689		Prediction of cardiovascular health by non-exercise estimated cardiorespiratory fitness	2020	Irrelevant	handler ikke om dose guidance	2021-12-11
20690		Interaction Between Apolipoprotein M Gene Single-Nucleotide Polymorphisms and Obesity and its Effect on Type 2 Diabetes Mellitus Susceptibility	2020	Irrelevant	handler ikke om dose guidance	2021-12-11
20691		Effect of standardized intensive insulin therapy guideline on glucose fluctuation in type 2 diabetes inpatients	2020	Irrelevant	handler ikke om dose guidance, men om basal-bolus terapi	2021-12-11
20692		Rates and Correlates of Incident Type 2 Diabetes Mellitus Among Persons Living With HIV-1 Infection	2020	Irrelevant	handler ikke om dose guidance	2021-12-11
20693		Adding web-based behavioural support to exercise referral schemes for inactive adults with chronic health conditions: the e-coacher rct	2020	Irrelevant	handler ikke om dose guidance	2021-12-11
20694		Executive summary of clinical practice guide on fracture risk in lifestyle diseases	2020	Irrelevant	Handler om forebyggelse af osteoporotiske frakturer blandt patienter med livsstilssygdomme som T2D, kronisk nyrer sygdom osv.	2021-12-15
20695		Comparative effectiveness of sglt2 inhibitors, glp-1 receptor agonists, dpp-4 inhibitors, and sulfonylureas on risk of kidney outcomes: Emulation of a target trial using health care databases	2020	Irrelevant	To examine the comparative effectiveness of sodium–glucose cotransporter 2 inhibitors (SGLT2i), glucagon-like peptide 1 receptor agonists (GLP-1), dipeptidyl peptidase 4 inhibitors (DPP-4), and sulfonylureas on risk of kidney outcomes among people with type 2 diabetes.	2021-12-15
20697		Modified kinetics of generation of reactive species in peripheral blood of patients with type 2 diabetes	2020	Irrelevant	The work aimed to study kinetics of response to microbial particles in blood to specify changes in regulatory mechanisms of generation of reactive species in patients with type 2 diabetes.	2021-12-15
20698		Is the type 2 diabetes epidemic plateauing in France? A nationwide population-based study	2020	Irrelevant	objectives were to determine type 2 diabetes prevalence and incidence rates between 2010 and 2017, stratified by gender, age and region, and to assess annual time trends over the study period in adults aged ≥ 45 years	2021-12-15
20700		Clinical review of the efficacy and safety of oral semaglutide in patients with type 2 diabetes considered for injectable GLP-1 receptor agonist therapy or currently on insulin therapy	2020	Irrelevant	his article summarizes data from two clinical studies with the first oral GLP-1RA, oral semaglutide, in situations where injectable therapy is often considered, and provides guidance on use in primary care. Review	2021-12-15
20701		Rationale and design of a randomised controlled trial testing the effect of personalised diet in individuals with pre-diabetes or type 2 diabetes mellitus treated with metformin	2020	Irrelevant	Protocol for RCT	2021-12-15
20702		Association of technologically assisted integrated care with clinical outcomes in type 2 diabetes in Hong Kong using the prospective JADE Program: A retrospective cohort analysis	2020	Irrelevant	Lyder ikke super relevant, men der bliver nævnt tailored decision support i abstract uden at det nævnes præcis ift. hvad.	2021-12-15
20704	https://www.ncbi.nlm.nih.gov/pmc/articles/PMC7510029/	Benchmarking the cost-effectiveness of interventions delaying diabetes: A simulation study based on navigator data	2020	Irrelevant	To estimate using the UK Prospective Diabetes Study Outcomes Model Version 2 (UKPDS-OM2) the impact of delaying type 2 diabetes onset on costs and quality-adjusted life expectancy using trial participants who developed diabetes in the NAVIGATOR study	2021-12-15
20706	https://www.sciencedirect.com/science/article/pii/S0939475320302507?via%3Dihub	Aspirin in a diabetic retinopathy setting: Insights from NO BLIND study	2020	Irrelevant	aim of this study was to assess a potential relationship between DR and aspirin therapy, in a type 2 diabetes cohort of patients screened through telemedicine	2021-12-15
20708	https://www.ncbi.nlm.nih.gov/pmc/articles/PMC7485238/	Changes in blood pressure thresholds for initiating antihypertensive medication in patients with diabetes: A repeated cross-sectional study focusing on the impact of age and frailty	2020	Irrelevant	To assess trends in systolic blood pressure (SBP) thresholds at initiation of antihypertensive treatment in patients with type 2 diabetes and the impact of age and frailty on these trends.	2021-12-15
20709		Bayesian variable selection for high dimensional predictors and self-reported outcomes	2020	Irrelevant	The onset of silent diseases such as type 2 diabetes is often registered through self-report in large prospective cohorts. Self-reported outcomes are cost-effective; however, they are subject to error. Diagnosis of silent events may also occur through the use of imperfect laboratory-based diagnostic tests. In this paper, we describe an approach for variable selection in high dimensional datasets …	2021-12-15
20711	https://www.deepdyve.com/lp/unpaywall/health-related-quality-of-life-associated-with-diabetic-retinopathy-in-mMy3GxFrKb?key=aalborg	Health-related quality of life associated with diabetic retinopathy in patients at a public primary care service in Southern Brazil	2020	Irrelevant	aimed to estabilish the utility of different health sates assoiciated with diabetic retinopathy in a Brazilian sample to provide input to model-based economic evaluations.	2021-12-15
20712	https://www.ncbi.nlm.nih.gov/pmc/articles/PMC7572171/	Cardiorenal syndrome in Type 2 diabetes mellitus - rational use of sodium-glucose cotransporter-2 inhibitors	2020	Irrelevant	handler ikke om dose guidance	2021-12-15
20712		Telehealth for wound management during the Covid-19 pandemic: Case studies	2020	Irrelevant	case study	2021-12-15
20718	https://www.sciencedirect.com/science/article/pii/S0026049520301621?via%3Dihub	Population insulin sensitivity from sparsely sampled oral glucose tolerance tests	2020	Irrelevant	This work aimed to estimate population-level insulin sensitivity (SI) from 2-hour oral glucose tolerance tests (OGTT) with less than 7 samples.	2021-12-15
20722	https://www.ncbi.nlm.nih.gov/pmc/articles/PMC7381260/	Methods and evaluation criteria for apps and digital interventions for diabetes self-management: Systematic review	2020	Irrelevant	review	2021-12-15
20723		Profiles of polyphenol intake and type 2 diabetes risk in 60,586 women followed for 20 years: Results from the e3n cohort study	2020	Irrelevant	We aimed to identify profiles of the dietary polyphenol subclasses intake associated with T2D.	2021-12-15
20725	https://www.ncbi.nlm.nih.gov/pmc/articles/PMC7481121/	Recreational diving in persons with type 1 and type 2 diabetes: Advancing capabilities and recommendations	2020	Irrelevant	Handler om sikkerhed ved kørsel af personer med type 2 diabetes.	2021-12-15
20730	https://www.ncbi.nlm.nih.gov/pmc/articles/PMC7212576/	Factors associated with the utilization of community-based diabetes management care: A cross-sectional study in Shandong Province, China	2020	relevant	This study aimed to investigate the utilization of community-based diabetes management care services, and explore the factors influencing utilization from both patients’ and providers’ points of view.	2021-12-15
20731	https://drc.bmj.com/content/8/1/e000962.abstract	Development and validation of the DIabetes Severity SCOre (DISSCO) in 139 626 individuals with type 2 diabetes: A retrospective cohort study	2020	Irrelevant	We developed and validated a type 2 diabetes severity score (the DIabetes Severity SCOre, DISSCO) and evaluated its association with risks of hospitalization and mortality, assessing its additional risk information to sociodemographic factors and HbA1c	2021-12-15
20734		Cost-effectiveness of diabetic retinopathy screening programs using telemedicine: A systematic review	2020	Irrelevant	review	2021-12-15
20736		Coronary artery disease and type 2 diabetes: A proteomic study	2020	Irrelevant	Coronary artery disease (CAD) is a major challenge in patients with type 2 diabetes (T2D). Coronary computed tomography angiography (CCTA) provides a detailed anatomic map of the coronary circulation. Proteomics are increasingly used to improve diagnostic and therapeutic algorithms. We hypothesized that the protein panel is differentially associated with T2D and CAD.	2021-12-15
20738	https://www.ncbi.nlm.nih.gov/pmc/articles/PMC7098994/	Review of Ongoing Activities and Challenges to Improve the Care of Patients With Type 2 Diabetes Across Africa and the Implications for the Future	2020	Irrelevant	review	2021-12-15
20744	https://link.springer.com/article/10.1186/s12933-020-00999-5	The risk of sudden cardiac arrest and ventricular arrhythmia with rosiglitazone versus pioglitazone: Real-world evidence on thiazolidinedione safety	2020	Irrelevant	We examined real-world effects of thiazolidinediones on outpatient-originating sudden cardiac arrest (SCA) and ventricular arrhythmia (VA).	2021-12-15
20745	https://drc.bmj.com/content/8/1/e000933.abstract	Factors associated with high oxidative stress in patients with type 2 diabetes: a meta-analysis of two cohort studies	2020	Irrelevant	meta analyse	2021-12-15
20747		The dietetic workforce distribution geographic atlas provides insight into the inequitable access for dietetic services for people with type 2 diabetes in Australia	2020	Irrelevant	The aim of the present study was to assess the accessibility to dietetic intervention for people with type 2 diabetes in Australia.	2021-12-15
20748	https://link.springer.com/article/10.1007/s13300-020-00760-x	Cost of Managing Type 2 Diabetes Before and After Initiating Dipeptidyl Peptidase 4 Inhibitor Treatment: A Longitudinal Study Using a French Public Health Insurance Database	2020	Irrelevant	This study aimed to evaluate the cost of managing type 2 diabetes (T2D) with dipeptidyl peptidase 4 inhibitors (DPP4Is) using real-world data.	2021-12-15
20751		Serum alanine transaminase as a predictor of type 2 diabetes incidence: the yuport prospective cohort study	2020	Irrelevant	handler ikke om dose guidance	2021-12-15
20752		Practical guidance for use of oral semaglutide in primary care: a narrative review	2020	Irrelevant	review	2021-12-15
20753		Analysis of incidence and prevalence of cardiovascular risk factors and evaluation of their control in epidemiological survey in the Czech Republic	2020	Irrelevant	The aim of this analysis was to analyze the presence of the most important cardiovascular (CV) risk factors and to discuss patterns of LDL cholesterol management in the population studied	2021-12-15
20754		Development and validation of a predictive model for the progression of diabetic kidney disease to kidney failure	2020	Irrelevant	We aimed to create a model to predict progression to kidney failure in patients with diabetic kidney disease	2021-12-15
20755		Primary Care Clinic Nurse Activities with a Telehealth Monitoring System	2020	Irrelevant	This work aimed to estimate population-level insulin sensitivity (SI) from 2-hour oral glucose tolerance tests (OGTT) with less than 7 samples.	2021-12-15
20756		The Cost-Effectiveness of Lifestyle Interventions for Preventing Diabetes in a Health Resource-Limited Setting	2020	Irrelevant	This study estimates the lifetime economic outcomes of lifestyle intervention among the prediabetic population in the Chinese context.	2021-12-15
20758		Effect of a mobile phone-based glucose-monitoring and feedback system for type 2 diabetes management in multiple primary care clinic settings: Cluster randomized controlled trial	2020	relevant	This study aimed to evaluate the clinical efficacy and applicability of a mobile phone–based glucose-monitoring and feedback system for the management of type 2 diabetes mellitus (T2DM) in multiple primary care clinic settings	2021-12-15
20759		Long non-coding RNAs regulate inflammation in diabetic peripheral neuropathy by acting as cernas targeting miR-146a-5p	2020	Irrelevant	handler ikke om dose guidance	2021-12-15
20760		Unravelling the utility of modern sulfonylureas from cardiovascular outcome trials and landmark trials: expert opinion from an international panel	2020	Irrelevant	review	2021-12-15
20761		HbA1c may contribute to the development of non-alcoholic fatty liver disease even at normal-range levels	2020	Irrelevant	handler ikke om dose guidance	2021-12-15
20736		MICOM: Metagenome-scale modeling to infer metabolic interactions in the gut microbiota	2020	Irrelevant	handler ikke om dose guidance	2021-12-15
20765	https://www.sciencedirect.com/science/article/pii/S016882271930991X?via%3Dihub	Program completion and glycemic control in a remote patient monitoring program for diabetes management: Does gender matter?	2020	Relevant	To examine gender differences in program completion and glycemic outcomes for patients with type 2 diabetes (T2D) in a remote patient monitoring (RPM) program for diabetes management.	2021-12-15
20766	https://oce.ovid.com/article/00042737-202001000-00017/HTML	Hepatitis B virus infection and the risk of liver disease progression in type 2 diabetic patients with potential nonalcoholic fatty liver disease: a retrospective, observational, cohort study in the United Kingdom Clinical Practice Research Datalink	2020	Irrelevant	Assess the risk of progression to cirrhosis and hepatocellular carcinoma (HCC) due to hepatitis B virus (HBV)-infection in patients with nonalcoholic fatty liver disease (NAFLD) and type 2 diabetes mellitus (T2DM).	2021-12-15
20767		Telemonitoring and Team-Based Management of Glycemic Control on People with Type 2 Diabetes: a Cluster-Randomized Controlled Trial	2020	Relevant	This study aims to evaluate the effects of remote telemonitoring with team-based management on people with uncontrolled type 2 diabetes.	2021-12-15
20768	https://onlinelibrary.wiley.com/doi/full/10.1111/jdi.13088	Comparing treatment intensification and clinical outcomes of metformin and dipeptidyl peptidase-4 inhibitors in treatment-naïve patients with type 2 diabetes in Japan	2020	Irrelevant	We investigated the frequency of occurrence to treatment intensification after the initiation of metformin or dipeptidyl peptidase-4 inhibitor treatment. Handler ikke om en dose guidance intervention	2021-12-15
21736		Statin therapy and risk of polyneuropathy in type 2 diabetes: A danish cohort study	2020	Irrelevant	handler ikke om dose guidance	2021-12-15
21737	https://link.springer.com/article/10.1186/s12933-020-01185-3	Association of circulating proprotein convertase subtilisin/kexin type 9 levels and the risk of incident type 2 diabetes in subjects with prediabetes: a population-based cohort study	2020	Irrelevant	The aim of this study was to examine the association of circulating PCSK9 levels and risk for the development of type 2 diabetes in individuals with prediabetes.	2021-12-15
21740		The association of dietary choline and betaine with the risk of type 2 diabetes: The atherosclerosis risk in communities (aric) study	2020	Irrelevant	o examine the association between dietary intake of choline and betaine and the risk of type 2 diabetes.	2021-12-15
21741		Association between glycated haemoglobin levels and cardiovascular outcomes in patients with type 2 diabetes and cardiovascular disease: a secondary analysis of the TECOS randomized clinical trial	2020	Irrelevant	Whether glycaemic control is associated with cardiovascular outcomes in patients with type 2 diabetes (T2D) is unclear. Consequently, we assessed the relationship between glycated haemoglobin (HbA1c) and cardiovascular outcomes in a placebo-controlled randomized trial which demonstrated no cardiovascular effect of sitagliptin in patients with T2D and atherosclerotic vascular disease.	2021-12-15
21742		The association of hyperglycaemia and insulin resistance with incident depressive symptoms over 4 years of follow-up: The Maastricht Study	2020	Irrelevant	Depression is twice as common in individuals with type 2 diabetes as in the general population. However, it remains unclear whether hyperglycaemia and insulin resistance are directly involved in the aetiology of depression. Therefore, we investigated the association of markers of hyperglycaemia and insulin resistance, measured as continuous variables, with incident depressive symptoms over 4 year…	2021-12-15
21745		Association between mean arterial pressure and risk of type 2 diabetes mellitus: The Rural Chinese Cohort Study	2020	Irrelevant	We aimed to investigate the association between MAP and risk of T2DM in rural Chinese adults.	2021-12-15
21748		Effects of GLP-1 Receptor Agonists and SGLT-2 Inhibitors in Heart Transplant Patients with Type 2 Diabetes: a Case Series	2020	Irrelevant	case study	2021-12-15
21749		Fib-4 regression with direct-acting antiviral therapy in patients with hepatitis c infection	2020	Irrelevant	handler ikke om dose guidance	2021-12-15
21750		Risk of cardiovascular events and serious hypoglycemia comparing patients with type 2 diabetes initiating a GLP1RA or basal insulin: A propensity score matched cohort study	2020	Irrelevant	To determine the risk of serious cardiovascular events and serious hypoglycemia comparing patients with type 2 diabetes newly initiating a GLP-1RA or basal insulin	2021-12-15
21751		Hypoglycemia-related ED visits and hospitalizations among initiators of insulin analogues compared to NPH insulin	2020	Irrelevant	To examine the risk of ED visits and hospitalizations for hypoglycemia among older T2DM patients who initiated long acting insulin or NPH in real world settings	2021-12-15
21752		Changes in prescribing of sodium-glucose co-transporter 2 inhibitors and dipeptidyl peptidase 4 inhibitors in Singapore	2020	Irrelevant	To assess changes in prescribing of SGLT2i and DPP4i in T2DM patients managed at public healthcare institutions in Singapore post-subsidy	2021-12-15
21753		Lack of insulin secretagogue deprescribing and risk of severe hypoglycemia following bariatric surgery	2020	Irrelevant	To assess the association of the lack of insulin secretagogues deprescribing and risk for severe hypoglycemia following bariatric surgery among patients with Type 2 diabetes mellitus (T2DM).	2021-12-15
21754		Dulaglutide proactive safety surveillance program (PSSP)	2020	Irrelevant	This PSSP aims at periodically detecting postmarketing safety signals of drug-event combinations (DEC) in relation with dulaglutide exposure in real-world practice settings.	2021-12-15
21755		Smart insulin pens improve time below range in multiple daily insulin therapy	2020	Irrelevant	handler ikke om basal insulin	2021-12-15
21756		Cost-effectiveness analysis of amputation risk and cardiovascular benefits with canagliflozin in patients with type II diabetes	2020	Irrelevant	A cost-effectiveness analysis was conducted comparing canagliflozin and BT versus BT alone, weighing its risk of amputation against its net clinical cardiovascular benefits	2021-12-15
21759		Visit-to-visit HbA1cvariability is associated with in-stent restenosis in patients with type 2 diabetes after percutaneous coronary intervention	2020	Irrelevant	We sought to investigate whether visit-to-visit HbA1c variability is a potential predictor of ISR in diabetic patients after stent implantation.	2021-12-15
21760		Hypoglycemia at the time of Covid-19 pandemic	2020	Irrelevant	To assess the factors associated with the risk of hypoglycemia during April–May 2020 lockdown in people with type 2 diabetes mellitus.	2021-12-15
21761		Pain in Patients with Type 2 Diabetes-Related Polyneuropathy Is Associated with Vascular Events and Mortality	2020	Irrelevant	We sought to examine the effect of neuropathic pain on vascular events and mortality in patients without DPN, DPN with pain (DPN + P), and DPN without pain (DPN-P).	2021-12-15
21767		Association between depression, dementia and inflammation in older people with type 2 diabetes	2020	Irrelevant	To investigate the prospective association between depression and dementia in older people with type 2 diabetes, and the potentially mediating role of inflammation.	2021-12-15
21768		Patient accessibility, cost savings and environmental impact of providing specialist diabetes support by telemedicine clinic in a remote and rural setting	2020	relevant	We aim to explore the reasons for referral, satisfaction of patients and savings in travel costs and carbon dioxide (CO2) emissions. I tvivl om dose guidance er dækket af denne telemedicinske intervention	2021-12-15
21769		Effect of a Collaborative Care Model on Depressive Symptoms and Glycated Hemoglobin, Blood Pressure, and Serum Cholesterol among Patients with Depression and Diabetes in India: The INDEPENDENT Randomized Clinical Trial	2020	Irrelevant	To assess whether collaborative care vs usual care lowers depressive symptoms and improves cardiometabolic indices among adults with diabetes and depression.	2021-12-15
21770		Serum total bile acids associate with risk of incident type 2 diabetes and longitudinal changes in glucose-related metabolic traits	2020	Irrelevant	We aimed to prospectively investigate associations of serum total bile acids (TBAs) with risk of incident T2D and longitudinal changes in glycemic traits.	2021-12-15
21773		Analysis via Markov decision process to evaluate glycemic control strategies of a large retrospective cohort with type 2 diabetes: the ameliorate study	2020	relevant	Our aim was to explore optimal treatment decisions for HbA1c control for type 2 diabetes mellitus patients and assess the impact on potential improvements in quality of life compared with current guidelines.	2021-12-15
21774		Achieving safer Ramadan fasting by keeping flexible glycemic targets during the day and tighter targets during the night in insulin treated people with type 2 diabetes	2020	relevant	To observe the effect of keeping flexible glycemic targets during fasting and tighter targets during non-fasting hours in insulin-treated people with type 2 diabetes during Ramadan.	2021-12-15
21775		Cost-effectiveness of interventions to manage diabetes: Has the evidence changed since 2008?	2020	Irrelevant	review	2021-12-15
21776		Diabetes complications and risks of breast cancer recurrence among older women	2020	Irrelevant	ur objective was to determine risk of recurrence associated with DM complications among older women with invasive BC.	2021-12-15
21777		Risk of cardiovascular events and serious hypoglycemia comparing patients with type 2 diabetes initiating a GLP-1 receptor agonist or basal insulin: A propensity-score matched cohort study	2020	Irrelevant	handler ikke om dose guidance	2021-12-15
21778		Dyslipidemia in adolescents and young adults with type 1 and type 2 diabetes: A retrospective analysis	2020	Irrelevant	we evaluated the prevalence and associations between lipid concentrations and clinical CVD risk factors in youth with T1D compared to T2D at our large ethnically diverse diabetes center.	2021-12-15
21780		Early puberty and risk for type 2 diabetes in men	2020	Irrelevant	The aim of the present study was to evaluate the association between pubertal timing and risk of adult type 2 diabetes, independent of prepubertal BMI, in Swedish men.	2021-12-15
21783		Democratizing type 1 diabetes specialty care in the primary care setting: project echo T1D	2020	Irrelevant	handler om type 1 og ikke type 2	2021-12-15
21784		Sglt2 inhibition compared with iso-energetic/Low-carbohydrate diet reprograms systemic substrate oxidation in type 2 diabetes	2020	Irrelevant	handler ikke om dose guidance	2021-12-15
21785		The korean titration: A randomized controlled trial to evaluate the efficacy and safety of self-titration algorithms of insulin glargine 300 units/ml in patients with uncontrolled type 2 diabetes	2020	relevant	To compare the efficacy and safety of two algorithms, the INSIGHT and EDITION, for insulin glargine 300 units/mL (Gla-300) in patients with uncontrolled type 2 diabetes treated with basal insulin	2021-12-15
21786		Remission through early monitored insulin therapy: Duration month	2020	relevant	he purpose of the Remission through Early Monitored Insulin Therapy- Duration Month (REMIT-DM) pilot study was to evaluate if individuals with T2DM in an outpatient setting could self-titrate insulin with an innovative titration algorithm using glucose values and trends from a real-time continuous glucose monitor (CGM).	2021-12-15
21787		Successful standardization of a hyperglycemic clamp method across multiple clinical centers in the restoring insulin secretion (Rise) study	2020	relevant	Måske glucose clamp method er en form for titrerngsmetode	2021-12-15
21788		The reality of diabetic ketoacidosis in patients with type 2 diabetes using SGLT2 inhibitors revealed by a nationwide claim-based database in Japan	2020	Irrelevant	Handler ikke basal insulins tritrering	2021-12-15
21790		Basal insulin digital titration app vs. Enhanced paper titration tool: A randomized control study	2020	relevant	We randomized 242 PWT2D on BI (baseline HbA1c 7.5% - 12.5%) to use either an appbased self-titration tool Mobile Insulin Dosing System (MIDS)] or an enhanced paper titration tool based on a stepped algorithm with diabetes educator support (control) for 16 weeks.	2021-12-15
21792		PDB25 COST-EFFECTIVENES OF REAL-WORLD USE OF GLP-1 RECEPTOR AGONISTS VERSUS OTHER GLUCOSE-LOWERING AGENTS IN TYPE 2 DIABETES	2020	Irrelevant	Konference abstract	2021-12-15
21795		Efficacy and Safety of Basal Insulin-Based Treatment Versus Twice-Daily Premixed Insulin After Short-Term Intensive Insulin Therapy in Patients with Type 2 Diabetes Mellitus in China: Study Protocol for a Randomized Controlled Trial (BEYOND V)	2020	Irrelevant	trial protocol	2021-12-15
21769		Gut microbiota composition explains more variance in the host cardiometabolic risk than genetic ancestry	2020	Irrelevant	We here examined whether the host genetic ancestry was associated with gut microbiota composition, and distinguished the effects of genetic ancestry and non-genetic factors on human cardiometabolic health	2021-12-15
21797		Trend 2010–2018 in the clinical use of GLP-1 receptor agonists for the treatment of type 2 diabetes in routine clinical practice: an observational study from Northeast Italy	2020	Irrelevant	We evaluated how the clinical phenotype of patients initiating GLP-1RA changed from 2010 to 2018	2021-12-15
21798		Preterm birth and risk of type 1 and type 2 diabetes: a national cohort study	2020	Irrelevant	We hypothesised that preterm birth is associated with increased risks of type 1 and type 2 diabetes into adulthood.	2021-12-15
21801		Clinical utility of 30-min plasma glucose for prediction of type 2 diabetes among people with prediabetes: Ancillary analysis of the diabetes community lifestyle improvement program	2020	Irrelevant	To examine the clinical utility of 30-min plasma glucose (30-min-PG) measurement during an oral glucose tolerance (OGTT) in predicting type 2 diabetes (T2DM).	2021-12-15
21804		Ethnic differences in the severity and clinical management of type 2 diabetes at time of diagnosis: A cohort study in the UK Clinical Practice Research Datalink	2020	Irrelevant	To characterize ethnic differences in the severity and clinical management of type 2 diabetes at initial diagnosis.	2021-12-15
21806		A digital workflow and decision support system to prevent diabetes-related acute hospital admissions and inpatient stays (the glucotab@mobilecare study)	2020	relevant	An algorithm-based (basal, basal+ insulin) digital workflow and decision support system (GlucoTab@ MobileCare) was developed and tested in a proof-of-principle study. The system enables independent insulin adjustments based on algorithm suggestions for daily visiting of domiciliary nursing staff. The aim of this retrospective analysis was to investigate diabetes-related acute hospital admissions …	2021-12-15
21807		Digital decision support for basal insulin therapy: RCT confirmed readiness for implementation in acute-geriatric care patients with type 2 diabetes	2020	relevant	The aim was to investigate efficacy, safety and healthcare professional's perception of the GlucoTab® system in patients at an acute-geriatric-hospital. An algorithm for basal-insulintherapy (including basal-plus) was developed based on the patients' individual health status and incorporated into GlucoTab®.	2021-12-16
21808		An adaptive model-based approach to personalized basal insulin initiation in type 2 diabetes	2020	relevant	We propose an adaptive dose guidance algorithm with automated glycemic target setting. The algorithm uses a dose estimation approach, developed using clinical data from 1.925 insulin naïve people with T2D.	2021-12-16
21809		Use of digital therapeutics in transitioning from inpatient to outpatient care among type 2 diabetes management: What works and how	2020	Irrelevant	expert opinion	2021-12-16
21810		How behavior change theories apply to digital therapeutics in type 2 diabetes management	2020	Irrelevant	The aim of this oral presentation is to examine the behavior change theories used in the development and deployment of insulin titration apps and SMBG related digital therapeutics	2021-12-16
21811		Desvenlafaxine-associated hyperglycemia: A case report and literature review	2002	Irrelevant	Case report and review	2021-12-16
21812		Adherence to lipid-lowering therapy and risk for cardiovascular disease and death in type 1 diabetes mellitus: A population-based study from the Swedish National Diabetes Register	2020	Irrelevant	The aim was to assessrisk of CVD by adherence and nonpersistence to LLT in T1D.	2021-12-16
21813		Associations of Innate and Adaptive Immune Cell Subsets With Incident Type 2 Diabetes Risk: The MESA Study	2020	Irrelevant	We hypothesized that the proportions of naive, memory, CD28-, Th17, and T regulatory CD4+ cells would be associated with incident T2D	2021-12-16
21817		Investigation of the effect of canagliflozin on the disposition index, a marker of pancreatic beta cell function, in patients with type 2 diabetes	2020	Irrelevant	Our aim was to investigate the effects of add-on canagliflozin with glimepiride dose adjustment or glimepiride dose adjustment on pancreatic beta cell function in patients with type 2 diabetes mellitus and inadequate glycemic control despite stable triple therapy (metformin, teneligliptin, and glimepiride) plus diet/exercise therapy	2021-12-16
21818		Evaluation of the use of sitagliptin for insulin resistance in burn patients	2020	Irrelevant	The objective of this study was to describe our institution’s experience with using sitagliptin to help mitigate insulin resistance after burn injury.	2021-12-16
21819		Diuretics and risk of lower extremity amputation amongst patients with insulin-treated type 2 diabetes–exploring the mechanism of possible sodium glucose co-transporter 2 inhibitor induced risk of lower extremity amputations	2020	Irrelevant	We investigated the potential association between diuretics use and the Lower extremity amputation risk in insulin-treated T2D patients.	2021-12-16
21821		Insulin Pump Therapy	2020	Irrelevant	review	2021-12-16
21822		Plasma concentrations ofmethylglyoxal during an oral glucose tolerance test are associated with worse beta cell function: The CODAM and Maastricht studies	2020	Irrelevant	We hypothesized that high MGO concentrations, particularly in persons with hyperglycaemia and/or diabetes, are associated with beta-cell dysfunction.	2021-12-16
21823		Effect of three different titration algorithms of insulin icodec vs insulin glargine U100 on time in range in patients with type 2 diabetes inadequately controlled on OADs	2020	relevant	This 16-week, randomized, open label, phase 2 trial compared the efficacy and safety of three titration algorithms of once-weekly icodec with once-daily insulin glargine U100 (IGlar U100) in insulin-naïve patients with T2D insufficiently controlled (HbA1c 7.0-10.0%) with oral antidiabetic drugs, to inform phase 3 trial designs	2021-12-16
21824		Mobile health-enabled insulin titration: Patient experience	2020	relevant	Mobile health (mHealth) technology may represent an efficient approach to provide the remote support needed to effectively adjust BI. However, research is warranted to investigate individuals' comfort and satisfaction with this approach, and willingness to follow automated, app-based titration guidance	2021-12-16
21825		Effective and safe basal-bolus insulin therapy during fasting episodes in hospitalised patients with type 2 diabetes using decision support technology	2020	Irrelevant	Electronic decision support systems (DSS) for basal-bolus insulin treatment (BBT) of patients with T2D have proven to be effective in controlling blood glucose (BG) in the inpatient setting. Little data exist on the management of fasting episodes so far. We tested the hypothesis that DSS may be suitable for efficient and safe diabetes management during fasting episodes.	2021-12-16
21826		Characterisation of seven HDL subspecies and their association with incident type 2 diabetes in PREVEND study	2020	Irrelevant	The aim of our current study was to investigate seven HDL subspecies and evaluate their association with incident T2D.	2021-12-16
21827		Clustering of patients with type 2 diabetes and established CV disease for prediction of disease progression and MACE (SAVORTIMI 53 trial)	2020	Irrelevant	. We aimed to investigate if clustering of diabetes essentially according to the method Ahlqvist et al. can be applied to a patient cohort with type 2 diabetes and established CV disease to investigate the clinical utility of the clustering to predict risk for disease progression and MACE	2021-12-16
21828		Improvement in glycemic control using algorithm-guided basal-bolus insulin therapy in hospitalized patients with type 2 diabetes	2020	Irrelevant	We aimed to analyze the effect of GlucoTab® BBI compared to standard care on glycemic control throughout inpatient stays on a general ward. Handler om basal-bolus titrering	2021-12-16
23216		Natural Polyphenols as Modulators of the Fibrillization of Islet Amyloid Polypeptide	2020	Irrelevant	handler ikke om dose guidance	2021-12-16
23345		Higher HOMA-IR index is associated with increased excess weight loss in patients with BMI≥35kg/m(2) after vertical gastrectomy	2020	Irrelevant	Our objective was to evaluate association between pre-surgical HOMA-IR index and percentage of excess weight loss (EWL%) one year after bariatric surgery using sleeve gastrectomy.	2021-12-16
23377		Diabetic ketoacidosis in patients with type 2 diabetes treated with sodium glucose co-transporter 2 inhibitors versus other antihyperglycemic agents: An observational study of four US administrative claims databases	2019	Irrelevant	To compare the incidence of diabetic ketoacidosis (DKA) among patients with type 2 diabetes mellitus (T2DM) who were new users of sodium glucose co-transporter 2 inhibitors (SGLT2i) versus other classes of antihyperglycemic agents (AHAs)	2021-12-16
23380		Predicting short- and long-term glycated haemoglobin response after insulin initiation in patients with type 2 diabetes mellitus using machine-learning algorithms	2019	relevant	To assess the potential of supervised machine-learning techniques to identify clinical variables for predicting short-term and long-term glycated haemoglobin (HbA1c) response after insulin treatment initiation in patients with type 2 diabetes mellitus (T2DM). I tvivl om det har noget med dose guidance at gøre.	2021-12-16
23359		Identification of repurposable drugs with beneficial effects on glucose control in type 2 diabetes using machine learning	2019	Irrelevant	We aimed to test the utility of machine learning applied to big data in identifying the potential role of concomitant drugs not taken for diabetes which may contribute to lowering blood glucose.	2021-12-16
23351		A Retrospective Observational Study of Insulin Glargine in Type 2 Diabetic Patients with Advanced Chronic Kidney Disease	2019	Irrelevant	o evaluate the efficacy and safety of insulin glargine in T2 DM patients with Stage 3 or 4 chronic kidney disease (CKD).	2021-12-16
23362		Obesity Does Not Modulate the Glycometabolic Benefit of Insoluble Cereal Fibre in Subjects with Prediabetes-A Stratified Post Hoc Analysis of the Optimal Fibre Trial (OptiFiT)	2019	Irrelevant	We conducted a stratified post hoc analysis of OptiFiT based on the presence or absence of obesity.	2021-12-16
23364		SPISE and other fasting indexes of insulin resistance: risks of coronary heart disease or type 2 diabetes. Comparative cross-sectional and longitudinal aspects	2019	Irrelevant	We intended to analyze a new recently presented fasting index, SPISE (sensitivity formula: 600 × HDL-cholesterol(0.185)/triglycerides(0.2)/BMI(1.338)), in comparison with three previously known fasting indexes, regarding correlation with the insulin clamp index, and for the predictive effects of future long-term risks of coronary heart disease (CHD) or manifest type 2 diabetes.	2021-12-16
23381		The pressure and temperature perturbation approach reveals a whole variety of conformational substates of amyloidogenic hIAPP monitored by 2D NMR spectroscopy	2019	Irrelevant	Here, we report pressure- and temperature-induced changes of NMR chemical shifts of monomeric hIAPP in bulk solution to elucidate the contribution of conformational substates in a residue-specific manner in their role as molecular determinants for the initial self-assembly.	2021-12-16
23388		Effectiveness and Safety of Physician-Led Versus Patient-Led Titration of Insulin Glargine in Indian Patients with Type 2 Diabetes Mellitus: A Subanalysis of the Asian Treat to Target Lantus Study (ATLAS)	2019	relevant	his analysis of Indian subset of Asian Treat to Target Lantus Study (ATLAS) compared effectiveness of patient-led with physician-led titration of once-daily insulin glargine 100 U/mL (Glargine-U-100) in patients with type 2 diabetes mellitus (T2DM) uncontrolled on oral antidiabetes drug (OAD)	2021-12-16
23392		Risk of clinically relevant hypoglycaemia in patients with type 2 diabetes self-titrating insulin glargine U-100	2019	Irrelevant	We evaluated risk factors for clinically relevant hypoglycaemia (blood glucose 8.5%) at Week 12 (titration period) and at Week 24 (overall study), and by subgroups of age (<65, ≥65 years) and previous insulin use (naïve or not).	2021-12-16
23413		Asprosin attenuates insulin signaling pathway through PKCδ-activated ER stress and inflammation in skeletal muscle	2019	Irrelevant	handler ikke om dose guidance	2021-12-16
23425		Remote Monitoring of Diabetes: A Cloud-Connected Digital System for Individuals With Diabetes and Their Health Care Providers	2019	relevant	A detailed description of this telemedicine system is provided, as well as results of completed clinical studies. Jeg er tvivl om det er et primær studie og om det handler om type 1 eller 2	2021-12-16
23426		Time to Insulin Initiation in Type 2 Diabetes Patients in 2010/2011 and 2016/2017 in Germany	2019	Irrelevant	The aim of the current study was to determine whether the time to insulin therapy initiation in patients with type 2 diabetes in primary care in Germany has changed in recent years.	2021-12-16
23397		Association of Galectin-3 With Diabetes Mellitus in the Dallas Heart Study	2019	Irrelevant	To evaluate if galectin-3 is associated with diabetes mellitus.	2021-12-16
23371		Primary Care Provider Encounter Cadence and HbA1c Control in Older Patients With Diabetes	2019	Irrelevant	his study measures associations between primary care provider encounter cadence and diabetes outcomes among individuals newly diagnosed with type 2 diabetes mellitus	2021-12-16
23373		Comparison of Characteristics Between Chinese Patients Taking Glucagon-like Peptide 1 Receptor Agonists and Insulin: A Cross-sectional Database Analysis	2019	Irrelevant	This study compares the baseline characteristics of Chinese patients with T2DM taking different prescriptions of first injectable therapy (GLP-1-RA or insulin).	2021-12-16
23387		Feasibility of Blood Glucose Management Using Intra-Arterial Glucose Monitoring in Combination with an Automated Insulin Titration Algorithm in Critically Ill Patients	2019	Relevant	This two-center pilot study combined for the first time an intra-arterial glucose sensor with a decision support system for insulin dosing (SGCplus system) in critically ill patients with hyperglycemia.	2021-12-16
23406		Interplay between Alzheimer's disease and global glucose metabolism revealed by the metabolic profile alterations of pancreatic tissue and serum in APP/PS1 transgenic mice	2019	Irrelevant	dyre studie	2021-12-16
23374		Association between mid-upper arm circumference and cardiometabolic risk in Chinese population: a cross-sectional study	2019	Irrelevant	Upper body fat has been associated with an unfavourable cardiometabolic risk. We aimed to investigate the associations between mid-upper arm circumference (MUAC), a novel indicator of upper body fat, and a wide spectrum of cardiometabolic risk profiles in Chinese population	2021-12-16
23375		Fatty liver index as a predictor of increased risk of cardiometabolic disease: finding from the Kuopio Ischaemic Heart Disease Risk Factor Study Cohort	2019	Irrelevant	Fatty liver disease (FLD), a global epidemic, is also a predictor of cardiometabolic disease (CMD) (type 2 diabetes or cardiovascular disease). Our objective was to examine whether progressive FLD, as assessed by fatty liver index (FLI), predicts increasing future CMD risk compared with relatively stable FLD, among middle-aged men.	2021-12-16
23376		Association between nut intake and non-alcoholic fatty liver disease risk: a retrospective case-control study in a sample of Chinese Han adults	2019	Irrelevant	Nut consumption has been associated with a lower risk of type 2 diabetes, metabolic syndrome and insulin resistance. However, its effect on the risk of non-alcoholic fatty liver disease (NAFLD) is unknown. Therefore, we investigated the relationship between nut consumption and NAFLD risk.	2021-12-16
23379		Multiple pregnancies and the risk of diabetes mellitus in postmenopausal women	2019	Irrelevant	We aimed to investigate whether the number of pregnancies during childbearing age was associated with diabetes in postmenopausal women with no history of gestational diabetes.	2021-12-16
23384		Associations Between Parity, Breastfeeding, and Risk of Maternal Type 2 Diabetes Among Postmenopausal Women	2019	Irrelevant	To examine associations among parity, breastfeeding history, and risk of developing type 2 diabetes among postmenopausal women	2021-12-16
23393		Discovery of biomarkers for glycaemic deterioration before and after the onset of type 2 diabetes: descriptive characteristics of the epidemiological studies within the IMI DIRECT Consortium	2019	Irrelevant	Here, we describe the characteristics of the Innovative Medicines Initiative (IMI) Diabetes Research on Patient Stratification (DIRECT) epidemiological cohorts at baseline and follow-up examinations (18, 36 and 48 months of follow-up).	2021-12-16
23401		Different treatment forms of type II diabetes and the risk of dementia in German health claims data	2019	Irrelevant	The association between type II diabetes (T2D) and increased all-cause dementia risk is well established. However, to date, there is no definite proof that a specific therapy for diabetes can halt a progress of cognitive decline. Therefore, we analyzed a large longitudinal random sample of German health claims data to focus on associations between T2D and dementia and to elucidate the role of dif…	2021-12-16
23407		Study design choices for evaluating the comparative safety of diabetes medications: An evaluation of pioglitazone use and risk of bladder cancer in older US adults with type-2 diabetes	2019	Irrelevant	The aim of the study was to empirically demonstrate the effect of varying study designs when evaluating the safety of pioglitazone in treating bladder cancer.	2021-12-16
23435		Insulin-Based Infusion System: Preliminary Study	2019	Relevant	The insulin balanced infusion system (IBIS) is a closed-loop system that uses a system controller, two syringe pumps, and capillary glucose sensor intravenously infusing regular insulin and/or dextrose. I tvivl om det bryder med nogle inkluion og eksklusions kriterier	2021-12-16
23438		Model-Based Tool for Personalized Adjustment of Basal Insulin Supply in Patients With Intensified Conventional Insulin Therapy	2019	Relevant	We hypothesized that this goal could be achieved with a modeling tool that determined the optimal basal insulin supply based on the patient's anamnestic data and monitored glucose values.	2021-12-16
23389		eIF4G1 and carboxypeptidase E axis dysregulation in O-GlcNAc transferase-deficient pancreatic β-cells contributes to hyperproinsulinemia in mice	2019	Irrelevant	dyre studie	2021-12-16
23378		Individualised targets for insulin initiation in type 2 diabetes mellitus-the influence of physician and practice: a cross-sectional study in eight European countries	2019	Irrelevant	To determine at what glycated haemoglobin (HbA1c) level physicians from eight European countries would initiate insulin in type 2 diabetes, which physician or practice related factors influenced this level and whether physicians would differentiate between a younger uncomplicated patient and an older patient with comorbidities	2021-12-16
23429		Effect of Insulin Resistance on BMD and Fracture Risk in Older Adults	2019	Irrelevant	We investigated the relationship among IR HOMA-IR, BMD, and incident nonspine fractures in nondiabetic individuals.	2021-12-16
23353		Association of the TCF7L2 (RS7903146) genotype with adiposity and metabolic markers in the Chilean adult population	2019	Irrelevant	To investigate the association of TCF7L2 (rs7903146) genotype with adiposity and metabolic markers in the Chilean adult population.	2021-12-16
23395		Effects of a Mediterranean Eating Plan on the Need for Glucose-Lowering Medications in Participants With Type 2 Diabetes: A Subgroup Analysis of the PREDIMED Trial	2019	Irrelevant	To examine the effects of two Mediterranean eating plans (Med-EatPlans) versus a low-fat eating plan on the need for glucose-lowering medications.	2021-12-16
23396		Alpha lipoic acid and metformin alleviates experimentally induced insulin resistance and cognitive deficit by modulation of TLR2 signalling	2019	Irrelevant	n this study, the effect of α-lipoic acid (ALA) has been examined in rodent model of zymosan induced insulin resistance and cognitive deficits, targeting at TLR-2 signalling	2021-12-16
23398		Treatment Patterns in Patients With Newly Diagnosed Type 2 Diabetes in China: A Retrospective, Longitudinal Database Study	2019	Irrelevant	The objectives of this study were to examine the patterns of antihyperglycemic drug (AHD) therapy among patients with newly diagnosed type 2 diabetes mellitus (T2DM) in the general Chinese population, stratified by initial hemoglobin (Hb) A(1c) level, and to assess whether treatment patterns are consistent with the recommendations published in the China Diabetes Society's clinical treatment guide…	2021-12-16
23405		BE-SMART (Basal Early Strategies to Maximize HbA1c Reduction with Oral Therapy): Expert Opinion	2019	Irrelevant	expert opinion	2021-12-16
23385		Barriers and Facilitators to the Implementation of a Mobile Insulin Titration Intervention for Patients With Uncontrolled Diabetes: A Qualitative Analysis	2019		This study aimed to conduct a qualitative evaluation assessing barriers to and the facilitators of the implementation of the Mobile Insulin Titration Intervention (MITI) program into usual care. I tvivl om sådan et studie her skal med. Det undersøger jo noget titrations intervention, men det er en kvalitativ undersøgelse af brugernes tilfredshed, så nok ikke dne primære undersølgelse af intervent…	2021-12-16
23386		Effect of metformin on neurodegenerative disease among elderly adult US veterans with type 2 diabetes mellitus	2019	Irrelevant	This study aimed to evaluate the association between metformin treatment and the risk of neurodegenerative disease (ND) among elderly adults with type 2 diabetes mellitus (T2DM).	2021-12-16
23391		Impact of type 2 diabetes treated with non-insulin medication and number of diabetes-coexisting diseases on EQ-5D-5 L index scores in the Finnish population	2019	Irrelevant	The aim of this study was to examine the effect of T2D and T2D-coexisting diseases on health-related quality of life (HRQoL) in the Finnish population and whether it is T2D or the coexisting diseases that have the largest impact on HRQoL.	2021-12-16
23447		Sustained fasting glucose oxidation and postprandial lipid oxidation associated with reduced insulin dose in type 2 diabetes with sodium-glucose cotransporter 2 inhibitor: A randomized, open-label, prospective study	2019	Irrelevant	We examined whether the reduction of plasma glucose using a sodium-glucose cotransporter 2 inhibitor, in inpatient diabetes management, has any effect on: (i) treatment period and basal-bolus dosage of insulin that achieve euglycemia; (ii) fasting/postprandial energy expenditure (EE); and (iii) energy substrate oxidation.	2021-12-16
23427		Anti-diabetic potential of Pueraria lobata root extract through promoting insulin signaling by PTP1B inhibition	2019	Irrelevant	handler ikke om dose guidance	2021-12-16
23399		Effect of pioglitazone in acute ischemic stroke patients with diabetes mellitus: a nested case-control study	2019	Irrelevant	We examined the secondary preventive effects of pioglitazone in acute ischemic stroke patients with diabetes mellitus (DM) based on nationwide real-world data.	2021-12-16
23402		Relationship between DXA measured metrics of adiposity and glucose homeostasis; An analysis of the NHANES data	2019	Irrelevant	handler ikke om dose guidance	2021-12-16
23419		Pancreatic AT1aR Deficiency Decreases Insulin Secretion in Obese C57BL/6 Mice	2019	Irrelevant	dyre studie	2021-12-16
23433		Pioglitazone Therapy in Patients With Stroke and Prediabetes: A Post Hoc Analysis of the IRIS Randomized Clinical Trial	2019	Irrelevant	To analyze the effects of pioglitazone in patients with good adherence as well as intention-to-treat effects of pioglitazone in patients with prediabetes in the IRIS trial.	2021-12-16
23400		Teaching patients with type 2 diabetes to self-administer insulin	2019	Irrelevant	The aim of this article is to provide practical guidance to assist commencement of insulin.	2021-12-16
23404		The International Federation of Gynecology and Obstetrics (FIGO) initiative on pre-eclampsia: A pragmatic guide for first-trimester screening and prevention	2019	Irrelevant	handler ikke om dose guidance	2021-12-16
23409		A longitudinal big data approach for precision health	2019	Irrelevant	We explored the ability of deep longitudinal profiling to make health-related discoveries, identify clinically relevant molecular pathways and affect behavior in a prospective longitudinal cohort (n = 109) enriched for risk of type 2 diabetes mellitus	2021-12-16
23411		Implementation of Basal-Bolus Therapy in Type 2 Diabetes: A Randomized Controlled Trial Comparing Bolus Insulin Delivery Using an Insulin Patch with an Insulin Pen	2019	Irrelevant	This multicenter, randomized controlled trial evaluated efficacy, safety, and self-reported outcomes in adults with type 2 diabetes, inadequately controlled on basal insulin, initiating and managing mealtime insulin with a wearable patch versus an insulin pen	2021-12-16
23414		Insulin Dependence Is Associated With Increased Medical Complications and Mortality After Shoulder Arthroscopy	2019	Irrelevant	To compare complications after shoulder arthroscopy in patients with insulin-dependent diabetes mellitus (IDDM), patients with non-insulin-dependent diabetes mellitus (NIDDM), and nondiabetic patients.	2021-12-16
23416		Italian Titration Approach Study (ITAS) with insulin glargine 300 U/mL in insulin-naïve type 2 diabetes: Design and population	2019	relevant	The Italian Titration Approaches Study (ITAS) aims at demonstrating non-inferiority (<0.3% margin) in efficacy of glucose control (change in glycated hemoglobin [HbA1c] after 24 weeks) by the same titration algorithm of insulin glargine 300 U/mL (Gla-300), managed by the (nurse assisted) patient versus the physician, in insulin naïve patients with Type 2 Diabetes Mellitus (T2DM), uncontrolled wit…	2021-12-16
23420		Appropriate Titration of Basal Insulin in Type 2 Diabetes and the Potential Role of the Pharmacist	2019	Irrelevant	review	2021-12-16
23434		Novel biomolecules of ageing, sex differences and potential underlying mechanisms of telomere shortening in coronary artery disease	2019	Irrelevant	We aimed to investigate the associations between leukocyte TLs (LTLs), chronological age, sex and comorbidities in CAD patients. Any covariations between LTL, GDF11, IGF1, SIRT-1 and pro-inflammatory cytokines were further assessed.	2021-12-16
23441		Utility of combined inflammatory biomarkers for the identification of cognitive dysfunction in non-diabetic participants of the ELSA-Brasil	2019	Irrelevant	cluster of selected inflammatory biomarkers was associated with worse cognitive scores in non-diabetic participants.	2021-12-16
23412		The Role of Muscle Decline in Type 2 Diabetes Development: A 5-Year Prospective Observational Cohort Study	2019	Irrelevant	We evaluate the possible risk factors associated with type 2 diabetes (T2DM) in adult subjects during a five-year prospective cohort study.	2021-12-16
23418		Relationship Between Body Mass Index, Antidiabetic Agents, and Midterm Mortality in Patients With Both Type 2 Diabetes Mellitus and Acute Coronary Syndrome	2019	Irrelevant	The aim of this study was to determine the influence of various antidiabetic therapies on the relationship between body mass index and all-cause mortality in patients with diabetes mellitus and acute coronary syndrome	2021-12-16
23415		Mobile-based insulin dose adjustment for type 2 diabetes in community and rural populations: study protocol for a pilot randomized controlled trial	2019	relevant	Considering the potential benefits of mHealth, we have developed an innovative mHealth-based care model to support patients and clinicians in diabetes specialist community outreach and telehealth clinics, that is, REthinking Model of Outpatient Diabetes care utilizing EheaLth - Insulin Dose Adjustment (REMODEL-IDA). This model primarily aims to improve the glycaemic management of patients with T2…	2021-12-16
23408		Beyond type 2 diabetes: sodium glucose co-transporter-inhibition in type 1 diabetes	2019	Irrelevant	handler ikke om type 2 diabetikere	2021-12-16
23432		Personalizing Second-Line Type 2 Diabetes Treatment Selection: Combining Network Meta-analysis, Individualized Risk, and Patient Preferences for Unified Decision Support	2019	relevant	We integrated these 3 considerations into a decision-modeling framework for the selection of second-line glycemic therapy for type 2 diabetes. I tvivl om det handler dose guidance	2021-12-16
23436		The PNPLA3 rs738409 C>G variant interacts with changes in body weight over time to aggravate liver steatosis, but reduces the risk of incident type 2 diabetes	2019	Irrelevant	In this study, we aimed to investigate the influence of PNPLA3 polymorphisms on liver fat content (LFC) and glucose metabolic variables, and the associations between these, during the natural course of body weight changes in a Chinese adult cohort.	2021-12-16
23437		Cost-effectiveness analysis of dapagliflozin treatment versus metformin treatment in Chinese population with type 2 diabetes	2019	Irrelevant	Because a new diabetes treatment strategy for diabetes should consider its cost-effectiveness, compared with an existing treatment, this study aimed to examine the cost-effectiveness between dapagliflozin and metformin treatment in China.	2021-12-16
23442		An observational, multicentre study on different insulin glargine U100 titration algorithms used in patients with type 2 diabetes in daily medical practice in Adriatic countries: The ADRESA study	2019	relevant	To compare the effectiveness of different titration algorithms for insulin glargine U100 used in everyday practice to achieve glycaemic targets in patients with type 2 diabetes mellitus (T2DM).	2021-12-16
23421		Rethinking Models of Outpatient Specialist Care in Type 2 Diabetes Using eHealth: Study Protocol for a Pilot Randomised Controlled Trial	2019	relevant	In collaboration, the Department of Diabetes and Endocrinology at Brisbane Princess Alexandra Hospital, the University of Queensland Centre for Health Services Research and the Australian e-Health Research Centre developed a mobile diabetes management system (MDMS) to support the management of complex outpatient type 2 diabetes mellitus (T2DM) adults. The system comprises of a mobile App, an auto…	2021-12-16
23482		Automated insulin dosing guidance to optimise insulin management in patients with type 2 diabetes: a multicentre, randomised controlled trial	2019	relevant	We aimed to determine whether the combination of the d-Nav device and health-care professional support is superior to health-care professional support alone.	2021-12-16
23424		Insulin in Type 1 and Type 2 Diabetes-Should the Dose of Insulin Before a Meal be Based on Glycemia or Meal Content?	2019	Irrelevant	review om dose guidance til basal-bolus regime	2021-12-16
23423		Letrozole treatment of adult female mice results in a similar reproductive phenotype but distinct changes in metabolism and the gut microbiome compared to pubertal mice	2019	Irrelevant	dyre studie	2021-12-16
23431		Plasma metabolites predict both insulin resistance and incident type 2 diabetes: a metabolomics approach within the Prevención con Dieta Mediterránea (PREDIMED) study	2019	Irrelevant	The aim of this study was to test whether baseline metabolites can additionally improve the prediction of insulin resistance beyond classical risk factors. Furthermore, we examined whether a multimetabolite model predicting insulin resistance in nondiabetics can also predict incident T2D.	2021-12-16
23444		Relationship between HbA1c and all-cause mortality in older patients with insulin-treated type 2 diabetes: results of a large UK Cohort Study	2019	Irrelevant	our aim was to study the relationship between HbA1c and cardiovascular morbidity and all-cause mortality among older insulin-treated patients with type 2 diabetes (T2D) after adjustment for multiple confounders.	2021-12-16
23410		The Association between Serum Uric Acid Levels and Insulin Resistance and Secretion in Prediabetes Mellitus: A Cross-Sectional Study	2019	Irrelevant	We investigated the association between serum uric acid (SUA) levels and insulin secretion and resistance in prediabetes patients, which is currently unclear	2021-12-16
23422		Association of polymorphisms in STRA6 gene with gestational diabetes mellitus in a Chinese Han population	2019	Irrelevant	The present study was directed to investigate whether the 3 single nucleotide polymorphism (SNPs) (rs11633768, rs351219, and rs736118) of STRA6 correlate with the development of GDM in Chinese pregnant women. We also aimed to estimate the relationship between SNPs with fasting blood glucose level, 1-hour and 2-hour blood glucose levels after 75 g oral glucose intake, fasting insulin and insulin r…	2021-12-16
23439		The role of C16:0 ceramide in the development of obesity and type 2 diabetes: CerS6 inhibition as a novel therapeutic approach	2019	Irrelevant	Therefore, we pharmacologically investigated the selective ablation of CerS6 using antisense oligonucleotides (ASO) in obese insulin resistance animal models.	2021-12-16
23476		Improved perfusion pattern score association with type 2 diabetes severity using machine learning pipeline: Pilot study	2019	Irrelevant	To develop a machine-learning pipeline to investigate the method's discriminative value between T2DM patients and normal controls, the T2DM-related network pattern, and association of the pattern with cognitive performance/disease severity.	2021-12-16
23445		Fracture Risk After Initiation of Use of Canagliflozin: A Cohort Study	2019	Irrelevant	To estimate risk for nonvertebral fracture among new users of canagliflozin compared with a glucagon-like peptide-1 (GLP-1) agonist.	2021-12-16
23451		The Structure of the SPOP-Pdx1 Interface Reveals Insights into the Phosphorylation-Dependent Binding Regulation	2019	Irrelevant	Here, we present the crystal structure of the SPOP-Pdx1 complex. We show that Pdx1 residues 223-233 bind to SPOP MATH domain with low micromolar affinity	2021-12-16
23449		High glucose alters fetal rat islet transcriptome and induces progeny islet dysfunction	2019	Irrelevant	We hypothesized that maternal hyperglycemia alters offspring pancreatic islet transcriptome and negatively impacts offspring islet function. We employed an infusion model capable of inducing localized hyperglycemia in fetal rats residing in the left uterine horn, thus avoiding other factors involved in programming offspring pancreatic islet health.	2021-12-16
23443		Perfluoroalkyl substances and risk of type II diabetes: A prospective nested case-control study	2019	Irrelevant	We assessed whether plasma PFAS, suspected to induce endocrine-disrupting effects, were prospectively associated with clinical type 2 diabetes (T2D) risk	2021-12-16
23459		Toward Better Understanding of Insulin Therapy by Translation of a PK-PD Model to Visualize Insulin and Glucose Action Profiles	2019	relevant	Hence, it may be helpful to practitioners to visualize insulin concentration profiles and associated glucose action profiles. Expanding on a previous analysis that established a pharmacokinetic (PK) model to describe typical profiles of insulin concentration over time following subcutaneous administration of various insulin formulations, the goal of the current analysis was to link the PK model t…	2021-12-16
23467		Titration and optimization trial for the initiation of insulin glargine 100 U/mL in patients with inadequately controlled type 2 diabetes on oral antidiabetic drugs	2019	relevant	We conducted an observational trial in 2470 patients with T2DM who initiated insulin glargine 100 U/L (Gla-100) on top of oral antidiabetic drugs. Physicians were free to choose either a "Davies," "Fritsche" or "individual" titration algorithm.	2021-12-16
23541		KRAS, YAP, and obesity in pancreatic cancer: A signaling network with multiple loops	2019	Irrelevant	handler ikke om dose guidance	2021-12-16
23450		Estimation of global insulin use for type 2 diabetes, 2018-30: a microsimulation analysis	2019	Irrelevant	The aim of this study was to compare alternative projections for and consequences of insulin use worldwide under varying treatment algorithms and degrees of insulin access.	2021-12-16
23452		Hypoglycemia and Incident Cognitive Dysfunction: A Post Hoc Analysis From the ORIGIN Trial	2019	Irrelevant	Thus, the aim of this study was to analyze the relationship between hypoglycemia and incident cognitive dysfunction in a group of carefully followed patients using prospectively collected data in the Outcome Reduction with Initial Glargine Intervention (ORIGIN) trial.	2021-12-16
23456		The Effect of a Smartphone-Based, Patient-Centered Diabetes Care System in Patients With Type 2 Diabetes: A Randomized, Controlled Trial for 24 Weeks	2019	relevant	This study evaluated the efficacy of a smartphone-based, patient-centered diabetes care system (mDiabetes) for type 2 diabetes that contains comprehensive modules for glucose monitoring, diet, physical activity, and a clinical decision support system.	2021-12-16
23464		Insulin adsorption onto zinc oxide nanoparticle mediates conformational rearrangement into amyloid-prone structure with enhanced cytotoxic propensity	2019	Irrelevant	Hence, the present study deals with the effect of zinc oxide nanoparticles (ZnONP) on the amyloidogenicity and cytotoxicity of insulin.	2021-12-16
20597		Optimal Timing of Insulin Initiation Using a Mathematical Model	2019	relevant	Konference proceeding	2021-12-16
20600	https://ieeexplore-ieee-org.zorac.aub.aau.dk/document/8920633	Model predictive control with sub-frequency actuation for long acting insulin treatment in type 2 diabetes	2019	relevant	Konference proceeding We propose a dose guidance algorithm to identify individualized optimal dosing of long acting insulin for T2D patients.	2021-12-16
20769		Highlights in heart failure	2019	Irrelevant	This article is aimed to give an update on recent advances in all aspects of this syndrome (heart failure)	2021-12-16
20770		CLINICAL PRACTICE GUIDELINES FOR THE PERIOPERATIVE NUTRITION, METABOLIC, AND NONSURGICAL SUPPORT OF PATIENTS UNDERGOING BARIATRIC PROCEDURES - 2019 UPDATE: COSPONSORED BY AMERICAN ASSOCIATION OF CLINICAL ENDOCRINOLOGISTS/AMERICAN COLLEGE OF ENDOCRINOLOGY, THE OBESITY SOCIETY, AMERICAN SOCIETY FOR METABOLIC & BARIATRIC SURGERY, OBESITY MEDICINE ASSOCIATION, AND AMERICAN SOCIETY OF ANESTHESIOLOGIST…	2019	Irrelevant	handler ikke om dose guidance	2021-12-16
20772		Prevalence and the Association of Body Mass Index and Other Risk Factors with Prediabetes and Type 2 Diabetes Among 50,867 Adults in China and Sweden: A Cross-Sectional Study	2019	Irrelevant	This study aims to determine the prevalence and risk factors for prediabetes and T2DM and to explore the effect of high body mass index (BMI) on the probability of T2DM being present among adults in China and Sweden.	2021-12-16
20773		Cost Effectiveness of a Technology-Enhanced Diabetes Care Management Program in Mexico	2019	relevant	To estimate the lifetime cost-effectiveness of a technology-based diabetes care management program from the perspective of the Mexican healthcare system.	2021-12-16
20774		Imbalance in glycemic control between the treatment and placebo groups in cardiovascular outcome trials in type 2 diabetes	2019	Irrelevant	The present study aimed to investigate glycemic control in cardiovascular outcome trials (CVOTs) performed by pharmaceutical sponsors, at the request of the United States Food and Drug Administration (FDA) to ensure that newer hypoglycemic agents do not increase cardiovascular risk for patients with type 2 diabetes.	2021-12-16
20775		Redesigning ambulatory care management for uncontrolled type 2 diabetes: A prospective cohort study of the impact of a Boot Camp model on outcomes	2019	relevant	We developed a Boot Camp to provide timely, patient-centered, technology-enabled DCM. Impact on hemoglobin A1c (HbA1c), emergency department (ED) visits and hospitalizations among adults with uncontrolled type 2 diabetes were examined. I tvivl om det indbefatter dose guidance of basal insulin	2021-12-16
20779		Investigating the Role of Childhood Adiposity in the Development of Adult Type 2 Diabetes in a 64-year Follow-up Cohort: An Application of the Parametric G-formula Within an Agent-based Simulation Study	2019	Irrelevant	This study investigated the contribution of childhood obesity to incident T2DM including pathways not through adult adiposity, and explored whether race modified this contribution.	2021-12-16
20782		Glycemia affects glomerular filtration rate in people with type 2 diabetes	2019	Irrelevant	We studied the extent to which glycemic variables associate with kidney function, and developed equations including these variables that estimate aGFR in people with T2DM.	2021-12-16
20783		Insulin dosing guidance to optimise type 2 diabetes management – Authors' reply	2019	Irrelevant	Authors' reply - hvordan håndteres det?	2021-12-16
20785		Estimating the impact of novel digital therapeutics in type 2 diabetes and hypertension: Health economic analysis	2019	Irrelevant	Our objective was to estimate the economic impact of a digital behavioral intervention in type 2 diabetes mellitus (T2DM) and hypertension (HTN) and estimate the impact of clinical inertia on deprescribing medications.	2021-12-16
20786		Diabetes Management Through Remote Patient Monitoring: The Importance of Patient Activation and Engagement with the Technology	2019	Irrelevant	To assess the importance of patient activation and engagement with remote patient monitoring technology in diabetes management among patients with type 2 diabetes.	2021-12-16
20788		Obstructive sleep apnoea in Type 2 diabetes mellitus: increased risk for overweight as well as obese people included in a national primary care database analysis	2019	Irrelevant	To determine obstructive sleep apnoea prevalence in people with Type 2 or Type 1 diabetes in a national primary care setting, stratified by BMI category, and to explore the relationship between patient characteristics and obstructive sleep apnoea.	2021-12-16
20789		Model predictive control for dose guidance in long acting insulin treatment of type 2 diabetes	2019	relevant	This paper proposes a model predictive control (MPC) based dose guidance algorithm to identify an individual’s optimal dosing of long acting insulin.	2021-12-16
20791		Engagement and Weight Loss: Results from the Mobile Health and Diabetes Trial	2019	Irrelevant	The aim of the mobile health and diabetes (mDiab) trial was twofold: to achieve 5% weight loss and to look at the association of weight loss with degree of engagement with the mDiab app.	2021-12-16
20792		Comparison of Major Adverse Cardiac Events between Instantaneous Wave-Free Ratio and Fractional Flow Reserve-Guided Strategy in Patients with or Without Type 2 Diabetes: A Secondary Analysis of a Randomized Clinical Trial	2019	Irrelevant	To compare 1-year clinical outcomes of iFR-guided or FFR-guided treatment in patients with and without diabetes in the Functional Lesion Assessment of Intermediate Stenosis to Guide Revascularization (DEFINE-FLAIR) trial.	2021-12-16
20794		Quantifying the Value of Orally Delivered Biologic Therapies: A Cost-Effectiveness Analysis of Oral Semaglutide	2019	Irrelevant	We perform a cost effectiveness analysis using a first and second order Monte Carlo simulation to estimate quality-adjusted life expectancies associated with an oral daily capsule, oral weekly capsule, daily injection, and weekly injection of semaglutide.	2021-12-16
20796		The relationship between Pittsburgh Sleep Quality Index subscales and diabetes control	2019	Irrelevant	Data suggest that poor sleep quality as measured by the Pittsburgh Sleep Quality Index (PSQI) contributes to suboptimal diabetes control. How the subscales comprising the PSQI individually relate to diabetes control is poorly understood.	2021-12-16
20797		Feasibility of Fully Closed Loop Insulin Delivery in Type 2 Diabetes	2019	Irrelevant	Contrary to almost all publications on the topic, the current paper investigates the feasibility of fully closed loop systems for patients with type 2 diabetes (T2D). Fullt closed dækker over basal-bolus regime	2021-12-16
20799		Patient experience on self-management support among primary care patients with diabetes and hypertension	2019	Irrelevant	To determine the extent of self-management support (SMS) provided to primary care patients with type 2 diabetes (T2D) and hypertension and its associated factors.	2021-12-16
20800		Clinical considerations when adding a sodiumglucose co-transporter-2 inhibitor to insulin therapy in patients with diabetes mellitus	2019	Irrelevant	The objectives were to affirm the efficacy and safety of SGLT2 inhibitors as an add-on to insulin, empower clinicians to minimise the risk of adverse events, and provide clinical guidance	2021-12-16
20802		A Prediction Model for Uncontrolled Type 2 Diabetes Mellitus Incorporating Area-level Social Determinants of Health	2019	Irrelevant	To develop a model for predicting whether a person with T2DM has uncontrolled diabetes (hemoglobin A1c ≥9%), incorporating individual and area-level (census tract) covariates.	2021-12-16
20803		Role of pre-existing type 2 diabetes in colorectal cancer survival among older Americans: a SEER-Medicare population-based study 2002–2011	2019	Irrelevant	Type 2 diabetes mellitus (diabetes) is a common comorbid condition among older adult colorectal cancer (CRC) patients, yet its effects on CRC mortality have not been adequately examined. This study aims to investigate the association between pre-existing diabetes, with and without complications, and CRC mortality.	2021-12-16
20807		Prognostic value of visit-to-visit systolic blood pressure variability related to diabetic kidney disease among patients with type 2 diabetes	2019	Irrelevant	This study aimed to evaluate the impact of visit-to-visit variability (VVV) of blood pressure on the risk of diabetic nephropathy and whether it provides additional predictive information among patients with type 2 diabetes mellitus (T2DM) in China.	2021-12-16
20808		Cost-effectiveness of an educational healthcare circuit for bariatric surgery in France	2019	Irrelevant	The objective of this study was to measure the viability of the EHC (shared medical appointments [SMAs] combined with bariatric surgery) through cost-effectiveness analysis.	2021-12-16
20810		Relationship between Blood HbA1c Level and Decayed Teeth in Patients with Type 2 Diabetes: A Cross-sectional Study	2019	Irrelevant	The purpose of this cross-sectional study was to determine whether there is an association between hemoglobin A1c (HbA1c) level and the presence or absence of decayed teeth in patients with type 2 diabetes mellitus.	2021-12-16
20811		Out-of-home informal support important for medication adherence, diabetes distress, hemoglobin A1c among adults with type 2 diabetes	2019	Irrelevant	We tested cross-sectional adjusted associations between CarePartner relationship characteristics and patients’ self-management, diabetes distress, and HbA1c and whether having an in-home supporter modified these associations Handler ikke om justering af basal insulin dose men nærmere adhærens	2021-12-17
20812		Medication regimen complexity and its impact on medication adherence and glycemic control among patients with type 2 diabetes mellitus in an Ethiopian general hospital	2019	Irrelevant	To evaluate medication regimen complexity and to assess its impact on medication adherence and glycemic control among patients with type 2 diabetes Mellitus (T2DM).	2021-12-17
20813		Insight of the interaction between 2,4-thiazolidinedione and human serum albumin: A spectroscopic, thermodynamic and molecular docking study	2019	Irrelevant	In this study, we investigated the binding of 2,4-TZD to human serum albumin (HSA).	2021-12-17
20814		Effect of Telephone-Delivered Interventions on Glycemic Control in Type 2 Diabetes Treated with Glargine Insulin	2019	Relevant	This study aimed to evaluate if eStar program was effective in helping patients reach their optimal insulin glargine dose within 6 months.	2021-12-17
20815		Explaining the long-term impact of chronic Q fever and Q fever fatigue syndrome on psychosocial functioning: A comparison with diabetes and the general population	2019	Irrelevant	This study examines whether these two conditions have a long-term impact on psychosocial functioning compared to the general population and patients with type 2 diabetes (DM) and investigate which mediating factors influence outcomes.	2021-12-17
20817		Inequalities in the use of eHealth between socioeconomic groups among patients with type 1 and type 2 diabetes: Cross-sectional study	2019	Irrelevant	The aim of this study was to investigate the use of 4 different eHealth platforms (apps, search engines, video services, and social media sites) and the association with socioeconomic status (SES) among people diagnosed with type 1 and type 2 diabetes mellitus (T1D and T2D, respectively).	2021-12-17
20823		Study protocol and baseline sample characteristics: From clinic to community: Using peer support as a transition model for improving long-term diabetes-related health outcomes	2019	Relevant	The objective of this randomized controlled trial is to examine the effects of a 12-month telephone-based peer-led diabetes self-management support (DSMS) intervention on long-term diabetes-related health outcomes. I tvivl om det er en protokol	2021-12-17
20824		Mobile phone text messaging in improving glycaemic control for patients with type 2 diabetes mellitus: A systematic review and meta-analysis	2019	Irrelevant	review	2021-12-17
20825		The Continuing Evolution of Precision Health in Type 2 Diabetes: Achievements and Challenges	2019	Irrelevant	review	2021-12-17
20827		Impact of ENHANCED (diEtitiaNs Helping pAtieNts CarE for Diabetes) Telemedicine Randomized Controlled Trial on Diabetes Optimal Care Outcomes in Patients with Type 2 Diabetes	2019	Relevant	To investigate the efficacy of a registered dietitian nutritionist–led telemedicine program compared with that of a control group in terms of diabetes optimal care goals. Der ændres noget med titrering i beskrivelsen af interventionen	2021-12-17
20828		Exenatide use and incidence of pancreatic and thyroid cancer: A retrospective cohort study	2019	Irrelevant	handler ikke om dose guidance	2021-12-17
20832		Community groups or mobile phone messaging to prevent and control type 2 diabetes and intermediate hyperglycaemia in Bangladesh (DMagic): a cluster-randomised controlled trial	2019	Irrelevant	We aimed to assess the effects of mHealth and community mobilisation on the prevalence of intermediate hyperglycaemia and diabetes among the general adult population in rural Bangladesh, and to assess the effect of these interventions on the incidence of type 2 diabetes among people with intermediate hyperglycaemia within the study population.	2021-12-17
20833		Evaluating the utility of self-reported questionnaire data to screen for dysglycemia in young adults: Findings from the US National Health and Nutrition Examination Survey	2019	Irrelevant	We sought to identify sex-specific predictors of current dysglycemia among young adults and evaluate their ability to screen for prediabetes and undiagnosed diabetes.	2021-12-17
20834		Addressing geographic confounding through spatial propensity scores: a study of racial disparities in diabetes	2019	Irrelevant	we aim to address a type of confounding that arises in spatially referenced observational studies. Specifically, we develop a spatial doubly robust propensity score estimator to reduce bias associated with geographic confounding, which occurs when measured or unmeasured confounding factors vary by geographic location, leading to imbalanced group comparisons.	2021-12-17
20835		Population-calibrated multiple imputation for a binary/categorical covariate in categorical regression models	2019	Irrelevant	However, for missing data generated by missing not at random mechanisms, MI performed assuming MAR might not be satisfactory. For an incomplete variable in a given data set, its corresponding population marginal distribution might also be available in an external data source. We show how this information can be readily utilised in the imputation model to calibrate inference to the population by i…	2021-12-17
20838		Comparison of FRAX in postmenopausal Asian women with and without type 2 diabetes mellitus: a retrospective observational study	2019	Irrelevant	To compare the fracture risk in postmenopausal Asian women with or without type 2 diabetes mellitus (T2DM).	2021-12-17
20839		Sex-related differences in frailty factors in older persons with type 2 diabetes: a cross-sectional study	2019	Irrelevant	This cross-sectional study aimed to describe sex-related differences in diabetes-specific factors underlying the development of frailty in older persons with type 2 diabetes.	2021-12-17
20840		Comparison of Performance of Equations for Estimated Glomerular Filtration Rate in Chinese Patients with Biopsy-Proven Diabetic Nephropathy	2019	Irrelevant	We aimed to evaluate the performance of equations for eGFR in Chinese patients with diabetic nephropathy (DN).	2021-12-17
20842		Review of the results of the Easydia international observational study. The effect of dose titration of diabeton MR on the effectiveness of treatment of type 2 diabetes	2019	Irrelevant	handler ikke om basal insulin	2021-12-17
20847		Comparison of three meta-analytic methods using data from digital interventions on type 2 diabetes	2019	Irrelevant	This study was aimed to compare pooled effect sizes estimated by Analysis of Covariance (ANCOVA), SACS, and SAFV meta-analyses, using the example of RCTs of digital interventions with HbA1c as the main outcome.	2021-12-17
20851		Insulin use for type 2 diabetes: the challenges of predicting trends and modelling care	2019	Irrelevant	handler ikke om dose guidance	2021-12-17
20852		DNA sequence variation in ACVR1C encoding the activin receptor-like kinase 7 influences body fat distribution and protects against type 2 diabetes	2019	Irrelevant	We conducted an exome-wide association study of coding variation in UK Biobank (405,569 individuals) to identify variants that lower WHRadjBMI and protect against type 2 diabetes.	2021-12-17
21831		RSSDI consensus recommendations on insulin therapy in the management of diabetes	2019	Irrelevant	expert opinion	2021-12-17
21835		Interplay between Alzheimer’s disease and global glucose metabolism revealed by the metabolic profile alterations of pancreatic tissue and serum in APP/PS1 transgenic mice	2019	Irrelevant	dyre studie	2021-12-17
21836		Efficacy of two telemonitoring systems to improve glycaemic control during basal insulin initiation in patients with type 2 diabetes: The TeleDiab-2 randomized controlled trial	2019	relevant	TeleDiab-2 was a 13-month randomized controlled trial evaluating the efficacy and safety of two telemonitoring systems to optimize basal insulin (BI) initiation in subjects with inadequately controlled type 2 diabetes (HbA1c, 7.5%-10%).	2021-12-17
21838		Comparative risk evaluation for cardiovascular events associated with dapagliflozin vs. empagliflozin in real-world type 2 diabetes patients: A multi-institutional cohort study	2019	Irrelevant	To compare the cardiovascular event risk in type 2 diabetes patients newly receiving dapagliflozin vs. empagliflozin.	2021-12-17
21839		Dietary antioxidant capacity and risk of type 2 diabetes mellitus, prediabetes and insulin resistance: the Rotterdam Study	2019	Irrelevant	Therefore, we aimed to determine associations between total dietary antioxidant capacity and risk of type 2 diabetes, prediabetes and insulin resistance.	2021-12-17
21840		Comparison of HbA1c levels and body mass index for prevention of diabetic kidney disease: A retrospective longitudinal study using outpatient clinical data in Japanese patients with type 2 diabetes mellitus	2019	Irrelevant	his study examined the association among the onset of diabetic kidney disease (DKD), blood glucose levels (HbA1C), and body mass index (BMI) in Japanese patients with type 2 diabetes mellitus.	2021-12-17
21841		Dipeptidyl peptidase-4 inhibitors and joint pain: A retrospective cohort study of older veterans with type 2 diabetes mellitus	2019	Irrelevant	To evaluate the association between a new prescription of DPP-4 inhibitors and joint pain within 1 year among older veterans with diabetes.	2021-12-17
21844		β-cell function and glucose effectiveness in the development of impaired fasting glucose in obese European children and adolescents	2019	Irrelevant	handler ikke om dose guidance	2021-12-17
21846		Evaluation of a pharmacist-managed antidiabetic deprescribing program in an integrated health care system	2019	relevant	: To evaluate the risk of hypoglycemia and other outcomes of pharmacist-managed deprescribing on selected antidiabetic medications under the guidance of a standardized program compared with usual care within an integrated health care system.	2021-12-17
21847		Identifying type 2 diabetes patients at risk for hypoglycemic events: Dealing with class imbalance	2019	Irrelevant	To test the impact of class imbalance when developing an algorithm for identifying T2D patients at risk for hypoglycemic events.	2021-12-17
21849		Impact of type 2 diabetes treated with non-insulin medication and number of diabetes-coexisting diseases on EQ-5D-5 L index scores in the Finnish population	2019	Irrelevant	The aim of this study was to examine the effect of T2D and T2D-coexisting diseases on health-related quality of life (HRQoL) in the Finnish population and whether it is T2D or the coexisting diseases that have the largest impact on HRQoL.	2021-12-17
21850		Future Perspectives for the Treatment of Diabetes: Importance of a Regulatory Framework	2019	Irrelevant	We performed an intensive survey of antidiabetic drugs approved in Japan, the United States, and the European Union.	2021-12-17
21851		Reduced mortality from lower respiratory tract disease in adult diabetic patients treated with metformin	2019	Irrelevant	we examined the association of metformin use with the risk of mortality from CLRD	2021-12-17
21852		Short-term cost-utility of degludec versus glargine U100 for patients with type 2 diabetes at high risk of hypoglycaemia and cardiovascular events: A Canadian setting (DEVOTE 9)	2019	Irrelevant	To evaluate the short-term cost-effectiveness of insulin degludec (degludec) vs insulin glargine 100 units/mL (glargine U100) from a Canadian public healthcare payer perspective in patients with type 2 diabetes (T2D) who are at high risk of cardiovascular events and hypoglycaemia.	2021-12-17
21853		Sustained fasting glucose oxidation and postprandial lipid oxidation associated with reduced insulin dose in type 2 diabetes with sodium–glucose cotransporter 2 inhibitor: A randomized, open-label, prospective study	2019	Irrelevant	We examined whether the reduction of plasma glucose using a sodium–glucose cotransporter 2 inhibitor, in inpatient diabetes management, has any effect on: (i) treatment period and basal–bolus dosage of insulin that achieve euglycemia; (ii) fasting/postprandial energy expenditure (EE); and (iii) energy substrate oxidation.	2021-12-17
21854		Inflammation and ventricular-vascular coupling in hypertensive patients with metabolic syndrome	2019	Irrelevant	Here we aimed to investigate the role of inflammation on the ventricular-vascular coupling in patients with MetS.	2021-12-17
21855		Lower rates of cardiovascular events and mortality associated with liraglutide use in patients treated with basal insulin: A DEVOTE subanalysis (DEVOTE 10)	2019	Irrelevant	To compare the associations between concomitant liraglutide use versus no liraglutide use and the risk of major adverse cardiovascular events (MACE) and all-cause mortality among patients receiving basal insulin (either insulin degludec degludec] or insulin glargine 100 units/mL glargine U100]) in the Trial Comparing Cardiovascular Safety of Insulin Degludec versus Insulin Glargine in Patients wi…	2021-12-17
21856		ISage: Successful basal insulin titration managed by a prescription-only digital therapy for T2DM	2019	relevant	. iSage Rx (iSage) is the first FDA-cleared digital therapy for basal insulin titration that is prescribed by providers and easily downloaded to patients' mobile phones	2021-12-17
21857		Effective treatment of T2D patients uncontrolled on multiple diabetes medications by adding afrezza mealtime ultra-rapid insulin	2019	Irrelevant	Handler om basal-bolus regime	2021-12-17
21858		A priori classification of type 2 diabetes patients to determine the needed therapy option	2019	relevant	Måske handler den om dose guidance	2021-12-17
21859		Diabetes-specific family functioning and implications for adults with type 2 diabetes	2019	Irrelevant	handler om adhærens	2021-12-17
21961		Insulin initiation and titration in patients with type 2 diabetes	2019	Irrelevant	review	2021-12-17
21862		PDB63 THE IMPACT OF HEART FAILURE ON DIABETES-RELATED HEALTHCARE UTILIZATION AND COSTS IN ADULT PATIENTS WITH TYPE 2 DIABETES	2019	Irrelevant	This study aimed to examine and compare diabetes-related HCU and costs in T2D patients with and without HF.	2021-12-17
21863		Association of gamma-glutamyl transferase and alanine aminotransferase with type 2 diabetes mellitus incidence in middle-aged Japanese men: 12-year follow up	2019	Irrelevant	To prospectively investigate whether simultaneous elevation of gamma-glutamyl transferase (GGT) and alanine aminotransferase (ALT) is associated with the increase of type 2 diabetes mellitus incidence independent of alcohol drinking, body mass index and triglycerides	2021-12-17
21865		Guideline adherence and improved treatment success rates for type-2-diabetes patients with a digital platform (PDMone)	2019	Irrelevant	Our analysis evaluates adherence to current treatment guidelines for type-2-diabetes and the association with treatment success	2021-12-17
21873		Insulin in type 1 and type 2 diabetes—should the dose of insulin before a meal be based on glycemia or meal content?	2019	Irrelevant	reveiw	2021-12-17
21874		Visceral adipose tissue loss is maintained despite weight regain 5 years after adolescent Roux-en-Y gastric bypass	2019	Irrelevant	No previous study has reported measures of visceral adipose tissue (VAT) and their relation to cardiometabolic health after bariatric surgery in the adolescent	2021-12-17
21875		The association between depressive symptoms and time to initiating insulin in people with type 2 diabetes	2019	Irrelevant	he aim of this study was to determine whether depressive symptoms near diagnosis were associated with time to insulin initiation or becoming insulin requiring at 6-8 years follow-up.	2021-12-17
21876		Predictive dosing support for long acting insulin in type 2 diabetes	2019	relevant	Our objective is to develop an automatic decision support algorithm that enables efficient and safe long-acting insulin initiation	2021-12-17
21877		Personalizing a mathematical model of T2DM via an evolutionary algorithm	2019	relevant	Måske det handler om dose guidance (Kompartment model)	2021-12-17
21879		Comparison of pharmacokinetics and exposure-response relationship of dapagliflozin in adult and adolescent/young adult patients with type 1 diabetes	2019	Irrelevant	We quantitatively compared the pharmacokinetics (PK) and exposure-response relationship of dapagliflozin between adult and adolescent/young adult patients with T1D.	2021-12-17
21880		Long acting insulin dose response modelling in type 2 diabetes	2019	relevant	We aim to develop a dose response model of long acting insulin to glucose dynamics to support emerging digital health and dose guidance solutions.	2021-12-17
21881		Meta-analysis of the effectiveness of the digital insulin titration apps and platforms	2019	Irrelevant	review	2021-12-17
21882		Investigation of titration method in basal insulin therapy with vildagliptin + metformin using continuous glucose monitor: Randomized crossover study	2019	relevant	We investigated whether previous administration of metformin or insulin in increased dose for intervention ('Insulin Increase') improves glycemic control earlier in patients treated with long-acting insulin and vildagliptin, who are hospitalized for glycemic control (PLVHG)	2021-12-17
21883		Performance of a 2-step insulin infusion protocol with adjustment of insulin doses for Asians in the medical intensive care unit following cardiothoracic surgery	2019	Irrelevant	In this study, we tested the efficacy and safety of our simple insulin infusion protocol utilizing lower insulin doses for Asians.	2021-12-17
21884		High triglycerides to HDL-cholesterol ratio is associated with insulin resistance in normal-weight healthy adults	2019	Irrelevant	To evaluate the association between high triglyceride/HDL-cholesterol (TG/HDL-C) ratio and insulin resistance (IR) or hyperinsulinemia after oral glucose tolerance test (OGTT) in normal-weight healthy adults.	2021-12-17
21885		Lipoprotein insulin resistance index, a high-throughput measure of insulin resistance, is associated with incident type II diabetes mellitus in the Prevention of Renal and Vascular End-Stage Disease study	2019	Irrelevant	The objective of the study was to evaluate the ability of the Lipoprotein Insulin Resistance Index (LP-IR) to predict incident T2DM in a large cohort.	2021-12-17
21886		Estimation of global insulin use for type 2 diabetes, 2018–30: a microsimulation analysis	2019	Irrelevant	The aim of this study was to compare alternative projections for and consequences of insulin use worldwide under varying treatment algorithms and degrees of insulin access	2021-12-17
21887		The role of continuous glucose monitoring, diabetes smartphone applications, and self-care behavior in glycemic control: Results of a multi-national online survey	2019	Irrelevant	his study investigated the determinants (with a special emphasis on the role of diabetes app use, use of continuous glucose monitoring (CGM) device, and self-care behavior) of glycemic control of type 1 and type 2 diabetes mellitus (DM).	2021-12-17
21889		Relationships of SLC2A4, RBP4, PCK1, and PI3K gene polymorphisms with gestational diabetes mellitus in a Chinese population	2019	Irrelevant	We explored whether single nucleotide polymorphisms (SNPs) of these "signalling pathway" genes are associated with gestational diabetes mellitus (GDM).	2021-12-20
21890		Cost-Effectiveness Evaluation of Bariatric Surgery for Morbidly Obese with Diabetes Patients in Thailand	2019	Irrelevant	To perform a cost-effectiveness evaluation of bariatric surgery compared with ordinary treatment for diabetes control in morbidly obese DM type 2 patients in Thailand.	2021-12-20
21892		Adverse effect profile and effectiveness of sodium glucose co-transporter 2 inhibitors (SGLT2i) - A prospective real-world setting study	2019	Irrelevant	The aim of this study was to evaluate the safety and effectiveness of SGLT2i in patients with T2DM in real-world setting.	2021-12-20
23358		Age and glycemic control among adults with type 2 diabetes in the United States: An assessment from the National Health and Nutrition Examination Survey (NHANES) 2013-2014	2019	Irrelevant	To assess the age and its association with glycemic control (GC) among adults with type 2-diabetes in the United States	2021-12-20
23440		High waist-to-hip ratio levels are associated with insulin resistance markers in normal-weight women	2019	Irrelevant	To assess the association between high waist-to-hip ratio (WHR) levels and insulin resistance (IR) or hyperinsulinemia after oral glucose tolerance test (OGTT) in a sample of normal-weight women.	2021-12-20
23448		Adherence to quality of care measurements among 58,182 patients with new onset diabetes and its association with mortality	2018	Irrelevant	This study evaluate changes over time in QoC measurement performance in a large diabetes registry among newly diagnosed diabetics and it association with mortality.	2021-12-20
23453		Managing diabetes and liver disease association	2018	Irrelevant	review	2021-12-20
23462		Determinants of Fasting Hyperglucagonemia in Patients with Type 2 Diabetes and Nondiabetic Control Subjects	2018	Irrelevant	We evaluated the interrelationship between fasting hyperglucagonemia and demographic and biochemical parameters in 106 patients with T2D	2021-12-20
23454		miR-483-5p associates with obesity and insulin resistance and independently associates with new onset diabetes mellitus and cardiovascular disease	2018	Irrelevant	Our aim was to identify serum microRNAs (miRNAs) in healthy humans which associate with future onset of both diabetes mellitus and cardiovascular disease.	2021-12-20
23455		Depression and glycaemic control among type 2 diabetes patients: a cross-sectional study in a tertiary healthcare facility in Ghana	2018	Irrelevant	In this study, we investigated the association between glycaemic control and depression in type 2 diabetes (T2DM) patients attending a tertiary healthcare facility in Ghana.	2021-12-20
23483		Increased megalin expression in early type 2 diabetes: role of insulin-signaling pathways	2018	Irrelevant	The current study examined if decreases in their renal expression, along with the albumin recycling protein neonatal Fc receptor (FcRn) could account for proteinuria/albuminuria in the Zucker diabetic fatty rat model of type 2 diabetes.	2021-12-20
23468		Sociodemographic Factors Associated With Engagement in Diabetes Self-management Education Among People With Diabetes in the United States	2018	Irrelevant	We examined sociodemographic, patient, and behavioral characteristics associated with DSME in a nationally representative sample.	2021-12-20
23473		Long-term cost-effectiveness analysis shows that IDegLira is associated with improved outcomes and lower costs compared with insulin glargine U100 plus insulin aspart in the US	2018	Irrelevant	The aim of the present analysis was to assess the long-term cost-effectiveness of IDegLira for treatment of patients with type 2 diabetes mellitus not meeting glycemic targets on basal insulin, vs insulin glargine U100 plus insulin aspart, in the US setting.	2021-12-20
23478		Regional differences in type 2 diabetes treatment and outcomes in Germany-An analysis of the German DPV and DIVE registries	2018	Irrelevant	we aimed to explore the impact of differences in treatment modalities on outcomes in Germany and put these into a global context	2021-12-20
23485		Metformin is associated with a lower risk of active tuberculosis in patients with type 2 diabetes	2018	Irrelevant	This study investigates the risk of active TB among persons with T2DM who were treated with various ADT and insulin therapies.	2021-12-20
23460		Associations of Physical Behaviours and Behavioural Reallocations with Markers of Metabolic Health: A Compositional Data Analysis	2018	Irrelevant	The aim is to examine the associations between physical behaviours and markers of metabolic health (fasting glucose, fasting insulin, 2-h glucose, 2-h insulin, Homeostasis Model Assessment of Insulin Sensitivity (HOMA-IS), Matsuda Insulin Sensitivity Index (Matsuda-ISI) while quantifying the associations of reallocating time from one physical behaviour to another using compositional analysi	2021-12-20
23461		Association Between Bariatric Surgery and Macrovascular Disease Outcomes in Patients With Type 2 Diabetes and Severe Obesity	2018	Irrelevant	To investigate the relationship between bariatric surgery and incident macrovascular (coronary artery disease and cerebrovascular diseases) events in patients with severe obesity and type 2 diabetes.	2021-12-20
23465		Comparative Safety of Dipeptidyl Peptidase-4 Inhibitors Versus Sulfonylureas and Other Glucose-lowering Therapies for Three Acute Outcomes	2018	Irrelevant	we identified initiators (365-day washout period) of DPP4 inhibitors and relevant comparators including initiators of sulfonylureas, metformin, thiazolidinediones, and insulin between January 2007 and January 2016 to quantify the association between DPP4 inhibitors and three acute health events - acute kidney injury, respiratory tract infections, and acute pancreatitis.	2021-12-20
23469		Discovery of DS-6930, a potent selective PPARγ modulator. Part II: Lead optimization	2018	Irrelevant	Because poor membrane permeability was responsible for poor potency in vitro, the adjustment of lipophilicity was examined, which resulted in the discovery of dimethyl pyridine derivative (I, DS-6930).	2021-12-20
23472		Up-Titration Strategy After DPP-4 Inhibitor-Based Oral Therapy for Type 2 Diabetes: A Randomized Controlled Trial Shifting to a Single-Dose GLP-1 Enhancer Versus Adding a Variable Basal Insulin Algorithm	2018	relevant	Our objective was to examine the efficacy of changing patients inadequately controlled with oral DPP-4i-based OAD therapy to injectable GLP-1RA and discontinuing the DPP4i versus adding basal insulin glargine (IGlar) with the continuation of the oral DPP4i.	2021-12-20
23471		Elevated RBP4 plasma levels were associated with diabetic retinopathy in type 2 diabetes	2018	Irrelevant	The aim of the present study was to evaluate the role of RBP4 in Chinese patients with type 2 diabetes mellitus with and without diabetic retinopathy (DR).	2021-12-20
23457		Renin-Angiotensin-Aldosterone System, Glucose Metabolism and Incident Type 2 Diabetes Mellitus: MESA	2018	Irrelevant	We investigated the cross-sectional associations of aldosterone and plasma renin activity with fasting plasma glucose, insulin resistance ( IR ), β-cell function, and longitudinal association with incident diabetes mellitus among adults in MESA (the multiethnic study of atherosclerosis) prospective cohort study.	2021-12-20
23475		Microvascular Outcomes in Patients With Diabetes After Bariatric Surgery Versus Usual Care: A Matched Cohort Study	2018	Irrelevant	To investigate the relationship between bariatric surgery and incident microvascular complications of T2DM.	2021-12-20
23482		Association Between Diabetic Retinopathy and Parkinson Disease: The Korean National Health Insurance Service Database	2018	Irrelevant	We assessed the association between DR and incident PD using a population-based database.	2021-12-20
23463		Practical implementation of ADA/EASD consensus algorithm in patients with type 2 diabetes in Pakistan	2018	relevant	To ascertain the effectiveness of implementing the American Diabetes Association/European Association for the Study of Diabetes 2009 consensus algorithm in achieving glycaemic control in patients with type 2 diabetes	2021-12-20
23466		Biosynthesis, structure, and folding of the insulin precursor protein	2018	Irrelevant	In this article, we bring together and unify 4 perspectives that span the features of preproinsulin biosynthesis including the earliest steps that deliver the protein to and through the ER membrane; structural features preserved in the proinsulin molecule to facilitate its folding to the native state in order to achieve ultimate biological activity; pathways of regulation of the ER environment th…	2021-12-20
23474		Approaches to rapid acting insulin intensification in patients with type 2 diabetes mellitus not achieving glycemic targets	2018	Irrelevant	handler om rapid acting insulin	2021-12-20
23484		Plasma lecithin:cholesterol acyltransferase and phospholipid transfer protein activity independently associate with nonalcoholic fatty liver disease	2018	Irrelevant	Here, we interrogated the impact of NAFLD on plasma LCAT and PLTP activities.	2021-12-20
23490		Efficacy and safety of MK-1293 insulin glargine compared with originator insulin glargine (Lantus) in type 2 diabetes: A randomized, open-label clinical trial	2018	Irrelevant	To compare the efficacy and safety of MK-1293 insulin glargine (Mk-Gla) and Lantus (Sa-Gla) in people with type 2 diabetes mellitus (T2DM).	2021-12-20
23492		Impact of treatment with pioglitazone on stroke outcomes: A real-world database analysis	2018	Irrelevant	Randomized controlled trials have reported an association between pioglitazone and reduced incidence of stroke in type 2 diabetic (T2DM) and insulin-resistant populations. We investigated this association within a real-world database.	2021-12-20
23493		Genome-wide interaction with the insulin secretion locus MTNR1B reveals CMIP as a novel type 2 diabetes susceptibility gene in African Americans	2018	Irrelevant	handler ikke om basal insulin	2021-12-20
23481		Assessment of the degree of abdominal myosteatosis by magnetic resonance imaging in subjects with diabetes, prediabetes and healthy controls from the general population	2018	Irrelevant	We assessed differences in the degree of abdominal myosteatosis among subjects with T2DM and prediabetes.	2021-12-20
23487		Dulaglutide versus insulin glargine in patients with type 2 diabetes and moderate-to-severe chronic kidney disease (AWARD-7): a multicentre, open-label, randomised trial	2018	Irrelevant	We assessed the efficacy and safety of dulaglutide in patients with type 2 diabetes and moderate-to-severe chronic kidney disease.	2021-12-20
23488		Association of antidiabetic medication use, cognitive decline, and risk of cognitive impairment in older people with type 2 diabetes: Results from the population-based Mayo Clinic Study of Aging	2018	Irrelevant	To determine the cross-sectional and longitudinal associations between diabetes treatment type and cognitive outcomes among type II diabetics.	2021-12-20
23497		Fetuin-B links nonalcoholic fatty liver disease to type 2 diabetes via inducing insulin resistance: Association and path analyses	2018	Irrelevant	We aimed to explore the independent associations and pathways among serum Fetuin-B, nonalcoholic fatty liver disease (NAFLD) and type 2 diabetes (T2D).	2021-12-20
23470		Titrating insulin in patients with type 2 diabetes using a structured self-monitoring blood glucose regimen	2018	Relevant	To assess the improvement in glycaemic control when an insulin titration algorithm was used in combination with SMBG in patients with poorly controlled, insulin-treated type 2 diabetes	2021-12-20
23480		Are low levels of serum bicarbonate associated with risk of progressing to impaired fasting glucose/diabetes? A single-centre prospective cohort study in Beijing, China	2018	Irrelevant	This study aims to investigate the association between serum bicarbonate and the risk of progressing to impaired fasting glucose (IFG)/diabetes mellitus (DM).	2021-12-20
23479		Lack of coordination between partners: investigation of Physician-Preferred and Patient-Preferred (4P) basal insulin titration algorithms in the real world	2018	Relevant	We hypothesized that patients and physicians have different preferences Physicians and diabetes patients were asked to choose their preferred insulin glargine self-titration algorithm among 5 algorithms	2021-12-20
23477		Impact of Metabolic Syndrome Factors on Testosterone and SHBG in Type 2 Diabetes Mellitus and Metabolic Syndrome	2018	Irrelevant	Our objective was to determine the impact of metabolic syndrome and diabetic parameters on testosterone and SHBG in both MetS subjects and type 2 DM patients	2021-12-20
23496		Homeostasis Model Assessment of Insulin Resistance and Survival in Patients With Diabetes and Acute Coronary Syndrome	2018	Irrelevant	Insulin resistance has been linked to development and progression of atherosclerosis and is present in most patients with type 2 diabetes. Whether the degree of insulin resistance predicts adverse outcomes in patients with type 2 diabetes and acute coronary syndrome (ACS) is uncertain	2021-12-20
23503		Safety of non-insulin glucose-lowering drugs in pregnant women with pre-gestational diabetes: A cohort study	2018	Irrelevant	To evaluate the association between use of non-insulin antidiabetics in early pregnancy and the risk of miscarriages, stillbirths and major structural malformations.	2021-12-20
23512		The role of metformin and statins in the incidence of epithelial ovarian cancer in type 2 diabetes: a cohort and nested case-control study	2018	Irrelevant	To obtain evidence of the effects of metformin and statins on the incidence of ovarian cancer in women with type 2 diabetes (T2D).	2021-12-20
23513		Evaluation of the oxidative stress-related genes ALOX5, ALOX5AP, GPX1, GPX3 and MPO for contribution to the risk of type 2 diabetes mellitus in the Han Chinese population	2018	Irrelevant	The aim of this study was to investigate the role of oxidative stress-related genes ALOX5, ALOX5AP, GPX1, GPX3 and MPO in type 2 diabetes mellitus susceptibility in the Chinese Han population.	2021-12-20
23523		User Experience of an Innovative Mobile Health Program to Assist in Insulin Dose Adjustment: Outcomes of a Proof-Of-Concept Trial	2018	Relevant	To develop an innovative mobile health (m-Health) mobile-based IDA program (mIDA) and evaluate the user adherence and experience through a proof-of-concept trial.	2021-12-20
23529		Incidence rate and patient characteristics of severe hypoglycemia in treated type 2 diabetes mellitus patients in Japan: Retrospective Diagnosis Procedure Combination database analysis	2018	Irrelevant	To evaluate the incidence rate of and identify factors associated with severe hypoglycemic episodes in patients with treated type 2 diabetes mellitus.	2021-12-20
23486		Methylation in 3' near region of GC gene and its association with the level of vitamin D binding protein and type 2 diabetes mellitus	2018	Irrelevant	This study hypothesized that DNA methylation of 3' near region of GC gene (3'GC) might be associated with T2DM.	2021-12-20
23500		Interplay between genetic predisposition, macronutrient intake and type 2 diabetes incidence: analysis within EPIC-InterAct across eight European countries	2018	Irrelevant	We aimed to increase our understanding of the aetiology of type 2 diabetes by investigating potential interactions between genes and macronutrient intake and their association with the incidence of type 2 diabetes.	2021-12-20
23502		Early glycemia and mortality in critically ill septic patients: Interaction with insulin-treated diabetes	2018	Irrelevant	To investigate the relationship between dysglycemia and hospital mortality in patients with and without a preadmission diagnosis of insulin treated diabetes mellitus (ITDM	2021-12-20
23509		Strategies for implementing effective mealtime insulin therapy in type 2 diabetes	2018	Irrelevant	This opinion paper provides an overview of considerations for primary care providers (PCPs) in intensifying the treatment regimen when basal insulin therapy is inadequate	2021-12-20
23519		Particulate matter and markers of glycemic control and insulin resistance in type 2 diabetic patients: result from Wellcome Trust Genetic study	2018	Irrelevant	We investigated the association between a year ambient concentration of PM(10) at residential places, using AERMOD dispersion model, with fasting plasma glucose (FPG), hemoglobin A1c (HbA1c), 2 h post meal plasma glucose (2hPG), homeostasis model assessment of insulin resistance (HOMA-IR), β-cell function (HOMA-β) and disposition index (DI) in 1213 diabetic patients from the Wellcome Trust Geneti…	2021-12-20
23521		Patient and prescriber characteristics among patients with type 2 diabetes mellitus continuing or discontinuing sulfonylureas following insulin initiation: data from a large commercial database	2018	Irrelevant	To describe patient and provider characteristics for patients with type 2 diabetes (T2DM) initiating basal insulin and describe basal insulin's impact on sulfonylurea (SU) discontinuation	2021-12-20
23489		iGlarLixi: A New Once-Daily Fixed-Ratio Combination of Basal Insulin Glargine and Lixisenatide for the Management of Type 2 Diabetes	2018	Irrelevant	review	2021-12-20
23491		Clinical Benefits Over Time Associated with Use of V-Go Wearable Insulin Delivery Device in Adult Patients with Diabetes: A Retrospective Analysis	2018	Irrelevant	This study evaluated the impact of V-Go(®) Wearable Insulin Delivery device on glycated hemoglobin (A1C) and insulin total daily dose (TDD) in patients with diabetes not achieving glycemic targets. Basal-bolus regime	2021-12-20
23515		The cost-effectiveness of dulaglutide versus insulin glargine for the treatment of type 2 diabetes mellitus in Japan	2018	Irrelevant	The objective of this study was to estimate the cost-effectiveness of dulaglutide vs insulin glargine for the management of T2DM from a Japanese healthcare perspective, in accordance with recently approved Japanese Cost-Effectiveness Guidelines.	2021-12-20
23494		Insulin therapy for type 2 diabetes - are we there yet? The d-Nav® story	2018	Irrelevant	review	2021-12-20
23504		Capreomycin inhibits the initiation of amyloid fibrillation and suppresses amyloid induced cell toxicity	2018	Irrelevant	In this manuscript, we investigated the antiamyloidogenic, fibril disaggregating, as well as cell protective effect of an anti-tuberculosis drug, Capreomycin (CN)	2021-12-20
23505		Insulin Matters: A Practical Approach to Basal Insulin Management in Type 2 Diabetes	2018	Irrelevant	expert opinion	2021-12-20
23508		Elevated Serum Xanthine Oxidase Activity Is Associated With the Development of Type 2 Diabetes: A Prospective Cohort Study	2018	Irrelevant	We aimed to evaluate whether xanthine oxidase (XO), a key enzyme in uric acid (UA) metabolism and a major source of reactive oxygen species, plays a causal and important role in the development of type 2 diabetes mellitus (T2DM) in a large prospective cohort study.	2021-12-20
23520		Bridging technology and clinical practice: innovating inpatient hyperglycaemia management in non-critical care settings	2018	Irrelevant	review	2021-12-20
23522		Social deprivation modifies the association between incident foot ulceration and mortality in type 1 and type 2 diabetes: a longitudinal study of a primary-care cohort	2018	Irrelevant	The aim of this study was to determine whether social deprivation in the presence of diabetes is an independent predictor of developing a foot ulcer and separately of mortality.	2021-12-20
23534		Impact of delaying treatment intensification with a glucagon-like peptide-1 receptor agonist in patients with type 2 diabetes uncontrolled on basal insulin: A longitudinal study of a US administrative claims database	2018	Irrelevant	To evaluate the effect of delaying treatment intensification with a glucagon-like peptide-1 receptor agonist (GLP-1 RA) on clinical and economic outcomes in patients with type 2 diabetes (T2D).	2021-12-20
23536		Primary care physician perspectives on basal insulin initiation and maintenance in patients with type 2 diabetes mellitus	2018	Irrelevant	To describe primary care physicians' (PCPs) perceptions of patient reactions and concerns about insulin initiation and identify opportunities for increased support.	2021-12-20
23498		Polycystic ovary syndrome, androgen excess, and the risk of nonalcoholic fatty liver disease in women: A longitudinal study based on a United Kingdom primary care database	2018	Irrelevant	Previous studies have suggested an increased risk of nonalcoholic fatty liver disease (NAFLD) in individuals with PCOS and implicated androgen excess as a potential driver.	2021-12-20
23499		Transition of a Text-Based Insulin Titration Program From a Randomized Controlled Trial Into Real-World Settings: Implementation Study	2018	relevant	This implementation study examined MITI's transition into real-world settings. To understand MITI's flexibility, generalizability, and acceptability among patients and providers, we evaluated whether MITI continued to produce positive outcomes in expanded underserved populations, outside of an RCT setting.	2021-12-20
23501		Does a prostate cancer diagnosis affect management of pre-existing diabetes? Results from PCBaSe Sweden: a nationwide cohort study	2018	Irrelevant	Both prostate cancer (PCa) and type 2 diabetes mellitus (T2DM) are increasingly prevalent conditions, which frequently coexist in men. Here, we set out to specifically examine the impact of a PCa diagnosis and its treatment on T2DM treatment	2021-12-20
23516		Serum Carnitine Metabolites and Incident Type 2 Diabetes Mellitus in Patients With Suspected Stable Angina Pectoris	2018	Irrelevant	We performed a comprehensive evaluation of metabolites along the carnitine pathway relative to incident T2D.	2021-12-20
23458		Insulin Initiation and Intensification	2018	Irrelevant	expert opinion	2021-12-20
23495		Interactions among the variants of insulin-related genes and nutrients increase the risk of type 2 diabetes	2018	Irrelevant	Accordingly, we identified the best gene-gene and gene-nutrient interactions using generalized multifactor dimensionality reduction (GMDR) in a large Korean cohort (n=8,842).	2021-12-20
23518		Increased Risk of Severe Hypoglycemic Events Before and After Cardiovascular Outcomes in TECOS Suggests an At-Risk Type 2 Diabetes Frail Patient Phenotype	2018	Irrelevant	We examined whether CV events were associated with subsequent SHE risk (hypo risk)	2021-12-20
23506		Family history and obesity in youth, their effect on acylcarnitine/aminoacids metabolomics and non-alcoholic fatty liver disease (NAFLD). Structural equation modeling approach	2018	Irrelevant	We tested two hypotheses: 1) If obesity precedes an excess of free fatty acids that increase oxidative stress and mitochondrial dysfunction, there would be an increase of serum acylcarnitines, amino acids and cytokines in obese subjects. Acylcarnitines would be related to non-alcoholic fatty disease that will induce insulin resistance. 2) If a positive family history of obesity and type 2 diabete…	2021-12-20
23511		A closed-loop multi-level model of glucose homeostasis	2018	relevant	In this study we propose a multi-level closed-loop model of whole-body glucose homeostasis, coupled with the molecular specifications of the insulin signaling cascade in adipocytes, under the experimental conditions of normal glucose regulation and type 2 diabetes.	2021-12-20
23507		Metformin reduces the risk of cancer in patients with type 2 diabetes: An analysis based on the Korean National Diabetes Program Cohort	2018	Irrelevant	The aim of this study was to investigate the relationship between metformin use and the incidence of cancer in Koreans with T2DM	2021-12-20
23510		Effect of adding GLP-1RA on mortality, cardiovascular events, and metabolic outcomes among insulin-treated patients with type 2 diabetes: A large retrospective UK cohort study	2018	Irrelevant	We therefore compared the times to a major nonfatal cardiovascular (CV) event and all-cause mortality among overweight patients with T2D treated with insulin alone versus insulin+GLP-1RA in a large UK database	2021-12-20
23527		Genetic influence on the associations between IGF-I and glucose metabolism in a cohort of elderly twins	2018	Irrelevant	In this study, we examined the interaction between IGF-I and glucose metabolism in a large cohort of clinically well-characterized elderly twins.	2021-12-20
23530		Ambient air pollution, adipokines, and glucose homeostasis: The Framingham Heart Study	2018	Irrelevant	To examine associations of proximity to major roadways, sustained exposure to fine particulate matter (PM(2.5)), and acute exposure to ambient air pollutants with adipokines and measures of glucose homeostasis among participants living in the northeastern United States.	2021-12-20
23533		Incretin-Based Therapies and the Short-term Risk of Pancreatic Cancer: Results From Two Retrospective Cohort Studies	2018	Irrelevant	We examined the risk of pancreatic cancer among patients with diabetes prescribed incretin drugs.	2021-12-20
23543		Identifying insulin treatment responders with a composite measure: beyond Hba1c < 7% in patients with type 2 diabetes	2018	Irrelevant	Many insulin-treated patients with type 2 diabetes (T2D) do not reach hemoglobin A1c (HbA1c) 62%) than CP (<41%).	2021-12-20
23514		Glitazones and alpha-glucosidase inhibitors as the second-line oral anti-diabetic agents added to metformin reduce cardiovascular risk in Type 2 diabetes patients: a nationwide cohort observational study	2018	Irrelevant	We investigated the cardiovascular risk of various ADAs used as add-on medication to metformin in T2DM patients from a nationwide cohort.	2021-12-20
23528		Prognostic Relation Between Severity of Diabetes Mellitus (On or Off Insulin) ± Chronic Kidney Disease with Cardiovascular Risk After Percutaneous Coronary Intervention	2018	Irrelevant	We sought to compare long-term outcomes in patients who underwent PCI with varying severity of DM with and without CKD.	2021-12-20
23517		Inhibition of insulin resistance by PGE1 via autophagy-dependent FGF21 pathway in diabetic nephropathy	2018	Irrelevant	However, it is unknown whether PGE1 inhibited insulin resistance in renal tubule epithelial cells via autophagy, which plays a protective role in DN against insulin resistance.	2021-12-20
23531		Association of Nonalcoholic Fatty Liver Disease With Lower Brain Volume in Healthy Middle-aged Adults in the Framingham Study	2018	Irrelevant	To assess the association between prevalent NAFLD and brain magnetic resonance imaging (MRI) measures	2021-12-20
23545		Decreased incidence of gout in diabetic patients using pioglitazone	2018	Irrelevant	this study evaluated the effects of pioglitazone, an insulin resistance inhibitor, on the incidence of gout in the diabetic population	2021-12-20
23524		Use of Decision Support Software to Titrate Multiple Daily Injections Yielded Sustained A1c Reductions After 1 Year	2018	relevant	The purpose was to improve the quality of care of at-risk patients through the addition of connected BG meters and CDSS to improve workflow and thus provide more efficient titration of patient's insulin regimens remotely between office visits in an attempt to treat them to their glucose targets faster and efficiently, and maintain that improvement over time.	2021-12-20
23538		Insulin resistance and glycine metabolism in humans	2018	Irrelevant	review	2021-12-20
23540		Cost Effectiveness of Exenatide Once Weekly Versus Insulin Glargine and Liraglutide for the Treatment of Type 2 Diabetes Mellitus in Greece	2018	Irrelevant	The objective of this study was to evaluate the long-term cost effectiveness of exenatide once weekly (ExQW) versus insulin glargine (IG) or liraglutide 1.2 mg (Lira1.2mg) for the treatment of adult patients with type 2 diabetes mellitus (T2DM) not adequately controlled on oral antidiabetic drug (OAD) therapy in Greece.	2021-12-20
23548		Clinical considerations for use of insulin degludec/insulin aspart in Japanese patients	2018	Irrelevant	review	2021-12-20
23570		Effects of Structured Versus Unstructured Self-Monitoring of Blood Glucose on Glucose Control in Patients With Non-insulin-treated Type 2 Diabetes: A Meta-Analysis of Randomized Controlled Trials	2018	Irrelevant	review	2021-12-20
23587		Review of methods for measuring β-cell function: Design considerations from the Restoring Insulin Secretion (RISE) Consortium	2018	Irrelevant	review	2021-12-20
20853		Canadian Cardiovascular Society Position Statement on Familial Hypercholesterolemia: Update 2018	2018	Irrelevant	Handler ikke om dose guidance	2021-12-20
20855		Stacked classifiers for individualized prediction of glycemic control following initiation of metformin therapy in type 2 diabetes	2018	Irrelevant	We developed machine learning models to predict which patients initially prescribed metformin will achieve and maintain control of their blood glucose after one year of therapy.	2021-12-20
20856		Spanish Diabetes Society (SED) recommendations for the pharmacologic treatment of hyperglycemia in type 2 diabetes: 2018 Update	2018	Irrelevant	Therefore, the Spanish Society of Diabetes (SED) entrusted to the Working Group of Consensus and Clinical Guidelines an update of the 2010 document Recommendations for Pharmacological Treatment of Hyperglycemia in Diabetes type 2. Novel aspects include nine characteristics to describe each drug group: efficiency, the risk of hypoglycemia, effects on body weight, the demonstrated effect in cardiov…	2021-12-20
20857		A school- and community-based intervention to promote healthy lifestyle and prevent type 2 diabetes in vulnerable families across Europe: Design and implementation of the Feel4Diabetes-study	2018	Irrelevant	To describe the design of the Feel4Diabetes-intervention and the baseline characteristics of the study sample.	2021-12-20
20858		Effectiveness of Digital Interventions for Improving Glycemic Control in Persons with Poorly Controlled Type 2 Diabetes: A Systematic Review, Meta-analysis, and Meta-regression Analysis	2018	Irrelevant	review	2021-12-20
20859		A prospective study to establish a new-onset diabetes cohort: From the consortium for the study of chronic pancreatitis, diabetes, and pancreatic cancer	2018	Irrelevant	handler ikke om dose guidance	2021-12-20
20860		Metabolic Surgery as a Treatment Option for Type 2 Diabetes Mellitus: Surgical View	2018	Irrelevant	review	2021-12-21
20861		An internet-based approach for lifestyle changes in patients with NAFLD: Two-year effects on weight loss and surrogate markers	2018	Irrelevant	Interventions aimed at lifestyle changes are pivotal for the treatment of non-alcoholic fatty liver disease (NAFLD), and web-based programs might help remove barriers in both patients and therapists	2021-12-21
20862	https://link-springer-com.zorac.aub.aau.dk/article/10.1186/s12913-018-3615-7	Developing an implementation strategy for a digital health intervention: An example in routine healthcare 11 Medical and Health Sciences 1117 Public Health and Health Services	2018	relevant	Using the implementation of a digital intervention within routine National Health Service (NHS) practice, we provide an example of how to develop a theoretically based implementation plan and how to report it transparently. I tvivl om det handler mest om selve implementeringen eller om det også handler om systemet funktion.	2021-12-21
20863		The effect of selective serotonin re-uptake inhibitors on risk of type II diabetes mellitus and acute pancreatitis: A meta-analysis	2018	Irrelevant	review	2021-12-21
20864		Influence of self-efficacy management on adherence to self-care activities and treatment outcome among diabetes mellitus type 2 sudanese patients	2018	Irrelevant	To identify the influence of management self-efficacy on adherence to self-care activities and treatment outcome among Sudanese patients with type 2 diabetes mellitus. Interview undersøgelse	2021-12-21
20866		Development of a collaborative algorithm for the management of type 2 diabetes during ramadan: An anchor on empowerment	2018	relevant	I tvivl om det er primære litteratur, og hvorvidt basal insulin titrering er en del af algoritmen.	2021-12-21
20867		Effect of psychotherapy for depression via home telehealth on glycemic control in adults with type 2 diabetes: Subgroup analysis of a randomized clinical trial	2018	relevant	We evaluated the impact of telemedicine-delivered behaviour activation treatment (BAT) on glycemic control in a subgroup of older adults with diabetes who participated in a randomized controlled trial for depression. I tvivl om hvad telemedicine-delivered behaviour activation treatment dækker over	2021-12-21
20869		Female reproductive history and risk of type 2 diabetes: A prospective analysis of 126 721 women	2018	Irrelevant	To examine the prospective associations between aspects of a woman's reproductive history and incident diabetes	2021-12-21
20871		Application of Constrained Optimization Methods in Health Services Research: Report 2 of the ISPOR Optimization Methods Emerging Good Practices Task Force	2018	Irrelevant	case study	2021-12-21
20872		47-Fold rise of diabetes in childbearing age Chilean women: Markov model and cost-effectiveness of prevention of birth defects	2018	Irrelevant	We aimed to project pregnancies and births among Chilean women of childbearing age (WCBA) with T2DM and report the incidence of birth defects and the associated years of life lost and lifetime costs.	2021-12-21
20873		Emerging Approaches in Surveillance of Type 1 Diabetes	2018	Irrelevant	review	2021-12-21
20874		A practical approach and algorithm for intensifying beyond basal insulin in type 2 diabetes	2018	Irrelevant	review	2021-12-21
20876		Relationship between very low low-density lipoprotein cholesterol concentrations not due to statin therapy and risk of type 2 diabetes: A US-based cross-sectional observational study using electronic health records	2018	Irrelevant	handler ikke om dose guidance	2021-12-21
20877		Smart Care Based on Telemonitoring and Telemedicine for Type 2 Diabetes Care: Multi-Center Randomized Controlled Trial	2018	relevant	This study was performed to determine the effectiveness of the Smart Care service on glucose control based on telemedicine and telemonitoring compared with conventional treatment in patients with type 2 diabetes.	2021-12-21
20878		Cost-effectiveness analysis of real-time continuous monitoring glucose compared to self-monitoring of blood glucose for diabetes mellitus in Spain	2018	Irrelevant	review	2021-12-21
20881		Diabetes education and medication adjustment in Ramadan (DEAR) program prepares for self-management during fasting with tele-health support from pre-Ramadan to post-Ramadan	2018	relevant	We evaluated the outcome for fasting Muslims with diabetes prepared with pre-Ramadan optimization through education and medication adjustment, tele-support and intervention up to post-Ramadan.	2021-12-21
20883		Diet quality is inversely associated with obesity in Chinese adults with type 2 diabetes	2018	Irrelevant	The aim of this study is to examine the association between diet quality and obesity in Chinese adults with T2D.	2021-12-21
20887		Validation of an hplc-uv method for the determination of metformin hydrochloride in spiked-human plasma for the application of therapeutic drug monitoring	2018	Irrelevant	handler ikke om basal insulin	2021-12-21
20888		Implications of Cardiovascular Outcomes Trials in Type 2 Diabetes for Primary Care	2018	Irrelevant	handler ikke om basal insulin	2021-12-21
20890		Developing and Implementing a Food Insecurity Screening Initiative for Adult Patients Living With Type 2 Diabetes	2018	Irrelevant	This pilot study explored the acceptability and feasibility of a food insecurity screening initiative within a diabetes care setting in Toronto.	2021-12-21
20894		Excess Hospitalization Expenses Attributable to Type 2 Diabetes Mellitus in Singapore	2018	Irrelevant	To estimate the excess hospitalization expenses attributable to type 2 diabetes mellitus (T2DM) in a high-income Asian country from the health system perspective and the patient perspective.	2021-12-21
20895		Cost-Effectiveness of a Technology-Facilitated Depression Care Management Adoption Model in Safety-Net Primary Care Patients with Type 2 Diabetes	2018	Irrelevant	To evaluate the cost-effectiveness of an information and communication technology (ICT)-facilitated depression care management program.	2021-12-21
20897		Comparative effectiveness of a technology-facilitated depression care management model in safety-net primary care patients with type 2 diabetes: 6-month outcomes of a large clinical trial	2018	Irrelevant	The aim of this study was to compare 6-month outcomes of a technology-facilitated care model with a usual care model and a supported care model that involved team-based collaborative depression care for safety-net primary care adult patients with type 2 diabetes.	2021-12-21
20899		Web-based intervention for depressive symptoms in adults with types 1 and 2 diabetes mellitus: A health economic evaluation	2018	Irrelevant	The aim is to assess the cost-effectiveness of a web-based intervention (GET.ON M.E.D.) for individuals with diabetes and comorbid depression compared with an active control group receiving web-based psychoeducation.	2021-12-21
20901		Cost-effectiveness of prevention and management of diabetic foot ulcer and amputation in a health resource-limited setting	2018	Irrelevant	The aim of the present study was to estimate the lifetime health and economic effects of different strategies of caring for diabetic foot in the Chinese setting.	2021-12-21
20903		BetaMe: Impact of a comprehensive digital health programme on HbA1c and weight at 12 months for people with diabetes and pre-diabetes: Study protocol for a randomised controlled trial	2018	Irrelevant	study protocol	2021-12-21
20906		Digital health interventions for adults with type 2 diabetes: Qualitative study of patient perspectives on diabetes self-management education and support	2018	Irrelevant	The objective of this study was to explore patient perspectives on unmet needs for self-management and support and the role of DHI in adults living with type 2 diabetes.	2021-12-21
20907		New Medications for the Treatment of Diabetes	2018	Irrelevant	review	2021-12-21
20908		Metabolic surgery for the treatment of type 2 diabetes in obese individuals	2018	Irrelevant	review	2021-12-21
20909		From diabetes care to diabetes cure-the integration of systems biology, ehealth, and behavioral change	2018	Irrelevant	review	2021-12-21
20911		An Application for Skin Macules Characterization Based on a 3-Stage Image-Processing Algorithm for Patients with Diabetes	2018	Irrelevant	In this paper, we present the design of a graphical user interface (GUI) developed in Matlab® as an application for the characterization of skin macules.	2021-12-21
20913		Circulating MicroRNA-4739 May Be a Potential Biomarker of Critical Limb Ischemia in Patients with Diabetes	2018	Irrelevant	handler ikke om dose guidance	2021-12-21
20914		Hereditary haemochromatosis and diabetes	2018	Irrelevant	handler ikke om type 2 diabetikere	2021-12-21
20916		Development and validation of a Health Policy Model of Type 2 diabetes in Chinese setting	2018	Irrelevant	Consequently, the principal aim of this study was to develop and validate a Health Policy Model (Chinese Outcomes Model for T2DM [COMT]) for supporting Chinese medical and health economic studies.	2021-12-21
20918		Food intake evaluation during the first year of postoperative of patients with type 2 diabetes mellitus or glycemic alteration submitted to roux-en-y gastric bypass	2018	Irrelevant	To analyze food intake evolution during the first postoperative year of Roux-en-y gastric bypass in patients with type 2 diabetes mellitus or glycemic alteration. Methods	2021-12-21
20920		Considerations for automated machine learning in clinical metabolic profiling: Altered homocysteine plasma concentration associated with metformin exposure	2018	Irrelevant	case study	2021-12-21
20923		Comparative risk of serious hypoglycemia with oral antidiabetic monotherapy: A retrospective cohort study	2018	Irrelevant	To examine and compare risks of serious hypoglycemia among antidiabetic monotherapy-treated adults receiving metformin, a sulfonylurea, a meglitinide, or a thiazolidinedione.	2021-12-21
20924		Pharmacotherapy of type 2 diabetes: An update	2018	Irrelevant	review	2021-12-21
20925		Vitamin B12 supplementation influences methylation of genes associated with Type 2 diabetes and its intermediate traits	2018	Irrelevant	To investigate the effect of B12 and/or folic acid supplementation on genome-wide DNA methylation.	2021-12-21
21894		APP-IDF-WPR-based approach to basal insulin titration: Initial results of the MyDoseCoach pilot in India	2018	Relevant	The objectives of this pilot project were to evaluate the glycemic parameters and basal insulin dose of patients who used the APP as well record the user experience from patients and physicians.	2021-12-21
21895		Lixisenatide and renal outcomes in patients with type 2 diabetes and acute coronary syndrome: an exploratory analysis of the ELIXA randomised, placebo-controlled trial	2018	Irrelevant	In this exploratory analysis of ELIXA, we investigate the effect of lixisenatide on renal outcomes.	2021-12-21
21896		From guidelines to clinical practice, reflections on the multinational randomised trial investigating the efficacy and safety of insulin degludec/insulin aspart and biphasic aspart 30 in patients with Type 2 diabetes before, during and after Ramadan	2018	Relevant	To provide clinical evidence reinforcing practical guidance concerning titration algorithm and dose modification for patients with Type 2 diabetes fasting during and/or outside Ramadan.	2021-12-21
21897		Genetic variants related to cardiometabolic traits are associated to B cell function, insulin resistance, and diabetes among American Indians: The strong heart family study	2018	Irrelevant	Our objective was to assess the association of genetic variants in cardiometabolic candidate genes with B cell dysfunction via HOMA-B, insulin resistance via HOMA-IR, and type 2 diabetes mellitus in the Strong Heart Family Study (SHFS).	2021-12-21
21898		The Risk of Type-2 Diabetes in Youth Prescribed Antidepressant Medications	2018	Irrelevant	review	2021-12-21
21900		Optimising basal-bolus therapy in type 2 diabetes: A randomised, controlled trial comparing bolus insulin delivery using an insulin patch vs an insulin pen	2018	Irrelevant	This multicenter randomized, controlled trial compared efficacy, safety, and subject-reported outcomes for adults with type 2 diabetes on basal insulin (HbA1c 7.5-11% 58-97 mmol/mol]) initiating mealtime insulin (aspart) with a wearable bolus insulin delivery patch (Patch) vs an insulin pen (Pen). Basal-bolus titrering	2021-12-21
21901		Physicians' intention and actual pattern of treatment in drug-naive patients with type 2 diabetes in the real-world setting in Japan	2018	Irrelevant	Few reports show physicians' intentions for treatment choice and real-world treatment patterns of anti-diabetes drugs (AD) for drug-naive patients. We conducted a web-survey and database analysis to address these evidence gaps.	2021-12-21
21902		Serum levels of angiopoietin-like protein 4 in relation to glomerular function and nephropathy severity in type 2 diabetic patients	2018	Irrelevant	handler ikke om dose guidance	2021-12-21
21903		A machine learning algorithm can identify clusters of patients with favourable glycaemic outcomes in a pooled European Gla-300 studies (REALI): Novel signposts for clinicians?	2018	Irrelevant	The objective of the present work was to explore patient-related variables and to identify clusters of patients who: 1. achieved HbA1c drop ≥0.5% from baseline to end of study (EoS); 2. experienced hypoglycemia event during the study (HEOS), and 3. achieved the combined outcome of HbA1c <7% at EoS without HEOS.	2021-12-21
21904		Use of supportive tools and education enables self-titration with insulin glargine 300 or 100 U/ml in type 2 diabetes: Results from TAKE CONTROL, INNOVATE and AUTOMATIX	2018	Relevant	This analysis aimed to examine the impact of titration tools and education to support individuals to self-titrate insulin glargine 300 U/mL (Gla-300) or 100 U/mL (Gla- 100).	2021-12-21
21905		Efficacy, safety and patient-reported outcomes (PROs) of patient-vs physician-led titration of Gla-300 in uncontrolled type 2 diabetes: the pan-European TAKE CONTROL study	2018	Relevant	his study evaluated whether the secondgeneration basal insulin, insulin glargine 300 U/ml (Gla-300) empowered patients to self-titrate effectively.	2021-12-21
21906		Development of a computerised, guideline based continuous glucose monitoring (CGM) directed therapy algorithm to assist physicians in the management of patients with type 2 diabetes	2018	Relevant	Kan umiddelbart ikke få adgang	2021-12-21
21907		The risk of total hypoglycaemia in patients with type 2 diabetes selftitrating insulin glargine U-100	2018	Relevant	Kan umiddelbart ikke få adgang	2021-12-21
21908		Real-world use of the MiniMed™670G system by patients with type 1 or type 2 diabetes	2018	relevant	he MiniMed™ 670G system with the SmartGuard™ Auto Mode feature automatically adjusts basal insulin delivery through its hybrid closed-loop algorithm. A retrospective analysis of glycemia in patients self-reported to have type 1 diabetes (T1D) or type 2 diabetes (T2D) during realworld use of the MiniMed™ 670G system (available in the US) was performed. I tvivl om sådan noget skal medtages	2021-12-21
21910		A quantitative systems pharmacology model of glucose-insulin regulation to guide the design and evaluation of novel basal insulins with optimal risk-benefit profile	2018	Irrelevant	To evaluate the effects of differential hepatic to peripheral tissue distributions of basal insulins using a Quantitative Systems Pharmacology (QSP) model with glucose-insulin regulation and metabolism (endogenous glucose production EGP], glucose disposal rate GDR]), hypoglycemic risk and subsequent glycemic control in patients with type 1 diabetes (T1DM) and type 2 diabetes (T2DM).	2021-12-21
21911		Comparison of glycemic control in patients with type 2 diabetes mellitus initiating insulin therapy at different blood glucose levels	2018	relevant	handler om dose guidance	2021-12-21
21912		Economic Value of Improved Accuracy for Self-Monitoring of Blood Glucose Devices for Type 1 and Type 2 Diabetes in England	2018	Irrelevant	he objective was to model clinical and economic outcomes of self-monitoring blood glucose (SMBG) devices with varying error ranges and strip prices for type 1 and insulin-treated type 2 diabetes patients in England.	2021-12-21
21913		Low serum creatinine predicts risk for type 2 diabetes	2018	Irrelevant	It is therefore hypothesized that low serum creatinine could effectively predict increased risk of T2DM.	2021-12-21
21914		Efficacy and safety of MK-1293 insulin glargine compared with originator insulin glargine (Lantus) in type 2 diabetes: A randomized, open-label clinical trial; Labaz(France); Merck and Co(United States)	2018	Irrelevant	To compare the efficacy and safety of MK-1293 insulin glargine (Mk-Gla) and Lantus (Sa-Gla) in people with type 2 diabetes mellitus (T2DM).	2021-12-21
21916		Impact of insulin sensitivity and B-cell function on the development of impaired glucose tolerance (IGT) in obese European children and adolescents	2018	Irrelevant	Compared to the US, prevalence rates of T2DM in obese children are significantly lower in European countries.	2021-12-21
21920		Relationships between chronic comorbidities and the atherosclerosis indicators ankle-brachial index and brachial-ankle pulse wave velocity in patients with type 2 diabetes mellitus	2018	Irrelevant	This study aimed to determine associations between ankle-brachial index (ABI) and brachial-ankle pulse wave velocity (baPWV) with different comorbidities in patients with type 2 diabetes mellitus (DM)	2021-12-21
21921		Risk of heart failure hospitalization among users of dipeptidyl peptidase-4 inhibitors compared to glucagon-like peptide-1 receptor agonists	2018	Irrelevant	We aimed to assess the risk of hospitalization due to HF with the use of DPP-4 inhibitors compared to GLP-1 receptor agonists.	2021-12-21
21922		Digitally enhanced insulin therapy-a multicenter clinical trial	2018	relevant	The d-Nav® Insulin Guidance Service overcomes this barrier. d-Nav is a handheld device that automatically titrates insulin dosage at least weekly, based on glucose readings that the patient is already scheduled to take with the d-Nav.	2021-12-21
21923		Basal insulin in clinical practice-can virtual patient simulation improve use in T2D?	2018	relevant	We sought to determine if online, virtual patient simulation (VPS)-based continuing medical education (CME) intervention could improve performance of primary care physicians (PCPs) and diabetologists/endocrinologists (D/Es) in evidence-based use of basal insulin for T2D.	2021-12-21
21924		Insulin titration algorithms incorporated into a patient glucose diary result in significant improvements in glucose profiles and A1c	2018	Irrelevant	Handler om basal-bolus regime	2021-12-21
21925		Self-managed titration with insulin glargine 300 u/ml (GLA-300) can achieve similar efficacy to physician-led titration regardless of prior insulin status in people with T2DM-results from take control	2018	relevant	Many people with T2DM do not achieve HbA1c goals in clinical practice, owing in part to sub-optimal basal insulin titration. TAKE CONTROL, a 24-week, multicenter, randomized, open-label, parallel-group study, compared the efficacy and safety of a Gla-300 titration algorithm (fasting self-monitored plasma glucose >130 mg/dL, +3 U; <80 mg/dL, -3 U), when self-managed or led by physicians.	2021-12-21
21926		Optimizing basal-bolus therapy in T2D-A randomized controlled trial comparing bolus insulin delivery using an insulin patch vs. An Insulin Pen	2018	Irrelevant	Handler om basal-bolus regime	2021-12-21
21927		The use of supportive tools and education enables self-titration with insulin glargine 300 (Gla-300) or 100 u/ml (Gla-100) in people with type 2 diabetes (T2DM)-results from take control, innovate, and automatix	2018	Irrelevant	abstract	2021-12-21
21928		Impact of patient-centered factors on comparative effectiveness of initial therapies in treatment-naïve T2D	2018	Irrelevant	abstract	2021-12-21
21929		Cost savings associated with digitally enhanced insulin therapy	2018	relevant	This 9-month study assessed the financial impact of the d-Nav service on diabetes related costs in sub-optimally control patients with T2D.	2021-12-21
21930		Circulating netrin-1 as a novel biomarker for impaired fasting glucose and newly diagnosed type 2 diabetes mellitus	2018	Irrelevant	we investigated the association between levels of netrin-1 and glycometabolic parameters.	2021-12-21
21931		Ethnic differences in hepatic insulin clearance seen since childhood suggest a genetic basis	2018	Irrelevant	ur aim was to examine whether hepatic insulin clearance impairment exists in AA since childhood.	2021-12-21
21932		Identification of patient profiles with better glycemic outcomes using machine learning-results from the international diabetes management practices study (IDMPS)	2018	Irrelevant	We conducted a retrospective exploratory analysis using data from the IDMPS (a global observational survey on the management of diabetes in the developing world) using a subgroup discovery algorithm (Q-finder) to identify factors (patient profiles PaPr]) associated with glycemic outcomes (good, HbA1c ≤7%; poor, HbA1c >7%) in people with type 2 diabetes.	2021-12-21
21933		Use of big-data algorithms to characterize patients with T2D on basal insulin (BI) who add a glucagon-like peptide-1 receptor agonist (GLP-1 RA) and predict their A1C response	2018	Irrelevant	This study had two aims: 1.) characterize patients on BI who add a GLP-1RA and 2.) identify predictors of ≥1% decline in A1C.	2021-12-21
21934		Efficacy of a basal-plus regimen	2018	Irrelevant	Objectives: 1.) To find out the efficacy of basal plus regime by evaluating the changes in HbA1c at 24 weeks. 2.) To find out changes in weight and frequency of hypoglycemia after initiation of the basal plus regime.	2021-12-21
21936		The efficacy of daily compared to twice weekly basal insulin titration algorithms among patients with type II diabetes mellitus: A 12-week randomized controlled trial	2018	relevant	This study compared two basal insulin titration algorithms in terms of time to achieve target glucose, adherence, hypoglycemia episodes, and HbA1c reduction.	2021-12-21
21940		Predictors of Insulin Initiation in Patients with Type 2 Diabetes: An Analysis of the Look AHEAD Randomized Trial	2018	Irrelevant	: We sought to identify patient factors that were independent predictors of insulin initiation among participants in the Look AHEAD (Action for Health in Diabetes) clinical trial	2021-12-21
21941		Capsule Commentary on Pilla et al., Predictors of Insulin Initiation in Patients with Type 2 Diabetes: an Analysis of the Look AHEAD Randomized Trial	2018		Capsule Commentary	2021-12-21
21943		Role of Continuous Glucose Monitoring in Insulin-Requiring Patients with Diabetes	2018	Irrelevant	review	2021-12-21
21045		Efficacy and safety of switching from basal insulin to once-daily insulin degludec/insulin aspart in Japanese patients with inadequately controlled type 2 diabetes: A 4-week, randomized, open-label, treat-to-target study	2018	relevant	A prospective, 4-week, single-center, randomized, open-label, parallel-group, treat-to-target study was carried out to develop an algorithm for safe and effective switching from basal insulin to once-daily insulin degludec/insulin aspart (IDegAsp) in patients with inadequately controlled type 2 diabetes.	2021-12-21
21946		Achieving ADA/ISPAD clinical guideline goals is associated with higher insulin sensitivity and cardiopulmonary fitness in adolescents with type 1 diabetes: Results from RESistance to InSulin in Type 1 ANd Type 2 diabetes (RESISTANT) and Effects of MEtformin on CardiovasculaR Function in AdoLescents with Type 1 Diabetes (EMERALD) Studies	2018	Irrelevant	We hypothesized that ISPAD/ADA goal achievement would be associated with better insulin sensitivity (IS) and cardiopulmonary fitness.	2021-12-21
21947		Treatment with insulin is associated with worse outcome in patients with chronic heart failure and diabetes	2018	Irrelevant	Up to one-third of patients with diabetes mellitus and heart failure (HF) are treated with insulin. As insulin causes sodium retention and hypoglycaemia, its use might be associated with worse outcomes.	2021-12-21
21948		Diabetes, metabolic comorbidities, and risk of hepatocellular carcinoma: Results from two prospective cohort studies	2018	Irrelevant	However, it is unknown whether T2D duration or additional metabolic comorbidities further contribute to HCC risk	2021-12-21
21949		Health care costs associated with incident complications in patients with type 2 diabetes in Germany	2018	Irrelevant	The aim of this study is to provide reliable regression-based estimates of costs associated with different type 2 diabetes complications.	2021-12-21
21950		METS-IR, a novel score to evaluate insulin sensitivity, is predictive of visceral adiposity and incident type 2 diabetes	2018	relevant	We developed a novel non-insulin-based fasting score to evaluate insulin sensitivity validated against the euglycemic–hyperinsulinemic clamp (EHC).	2021-12-21
21952		Lipidome patterns and the risk of type 2 diabetes in the PREDIMED study	2018	Irrelevant	Our aim was to identify lipidome patterns longitudinally associated with T2D, including analyses of their 1-year changes and the subsequent T2D risk in the context of a Mediterranean diet intervention trial.	2021-12-21
21954		Cardiovascular outcomes and risks after initiation of a sodium glucose cotransporter 2 inhibitor: Results from the EASEL population-based cohort study (evidence for cardiovascular outcomes with sodium glucose cotransporter 2 inhibitors in the real world)	2018	Irrelevant	Clinical trials have shown cardiovascular benefits and potential risks from sodium glucose cotransporter 2 inhibitors (SGLT2i).	2021-12-21
21958		A Real-World Anti-Diabetes Medication Cost Comparison Between Premixed Insulin Analogs and Long-Acting Insulin Analogs in Chinese Patients with Type 2 Diabetes: A Retrospective Database Analysis	2018	Irrelevant	To assess and compare per-day anti-diabetic medication costs for Chinese type-2 diabetes mellitus (T2DM) insulin-naïve patients between those who initiated premixed insulin analogs (“premixed group”) and those who initiated long-acting insulin analogs (“long-acting group”).	2021-12-21
21959		Is there any effect of maternal dietary acid load during pregnancy on arising gestational diabetes mellitus?	2018	Irrelevant	Therefore, the aim of this study was to evaluate the potential relationship between dietary acid load in second trimester, blood lipid profiles and GDM.	2021-12-21
21960		Stress action signatures of blood glucose variability in two intensive care populations	2018	Irrelevant	We hypothesize that model-based (in silico simulation) assessments of stress action will show distinct statistical characteristics for different ICU populations.	2021-12-21
21961		Blood glucose control in patients with type 2 diabetes who decline insulin therapy	2018	Irrelevant	Undersøger hvorfor patienter takker nej til insulin	2021-12-21
21962		Diabetes treatment algorithm for HIV	2018	Irrelevant	handler ikke om dose guidance	2021-12-21
21963		Case report: Association of repeated bolus jejunal nutrient administration with rapid reduction in blood glucose and insulin requirements in an obese adult with type 2 diabetes	2018	Irrelevant	To assess glycemic control following repeated nutrient bolus delivery to the jejunum via enteral feeding tube in an obese subject with type 2 diabetes.	2021-12-21
21964		Use of intensive glycemic management in older adults with diabetes. An analysis from the diabetes collaborative registry	2018	Irrelevant	we examined contemporary data to understand to what extent older patients with diabetes are still intensively managed with agents that can cause hypoglycemia.	2021-12-21
21967		Reducing intensive glycaemic management among older people with Type 2 diabetes prescribed sulphonylurea (SU) or insulin therapies	2018	Irrelevant	Intensive glycaemic management in adults with Type 2 diabetes and clinical complexity doubles the risk of severe hypoglycaemia.	2021-12-21
21968		Does baseline HbA1c or change in HbA1c predict the reduction in cardiovascular death with empagliflozin? Results from EMPA-REG OUTCOME	2018	Irrelevant	We investigated whether baseline HbA1c or change in HbA1c influenced the reduction in CV death	2021-12-21
21970		A proof-of concept study to evaluate a weekly physician-driven insulin titration algorithm in patients prescribed V-Go® wearable insulin delivery device	2018	relevant	To support development of dosing guidance, this retrospective proof-of-concept study evaluated the use of a weekly physician-driven insulin titration algorithm in patients prescribed V-Go in order to formulate the design of a prospective patient-driven insulin titration study	2021-12-21
21971		Modeling glucose regulation in postprandial intermittent high intensity exercise with T2DM patients	2018	Irrelevant	Konference abstract	2021-12-21
21972		Muscular strength and type 2 diabetes prevention	2018	Irrelevant	We hypothesised that muscular strength, independent of cardiorespiratory fitness, has significant benefits in type 2 diabetes prevention.	2021-12-21
21973		Circulating prolactin concentrations and risk of type 2 diabetes in us women	2018	Irrelevant	However, whether circulating levels of prolactin are associated with risk of type 2 diabetes (T2D) remains unclear	2021-12-21
21974		Soluble urokinase plasminogen activator receptor compared to coronary artery calcium score and high sensitivity C reactive protein in predicting death in african americans with diabetes	2018	Irrelevant	We characterized the determinants of suPAR in diabetics, and whether levels are useful to predict mortality above and beyond clinical characteristics including coronary calcium (CAC) and high-sensitivity C-reactive protein (hs-CRP).	2021-12-21
21975		Interrelationship of the rs7903146 TCF7L2 gene variant with measures of glucose metabolism and adiposity: The NEO study	2018	Irrelevant	We investigated the interrelationship of rs7903146-T in TCF7L2 with measures of glucose metabolism and measures of adiposity.	2021-12-21
21976		Mortality Associated with Metformin Versus Sulfonylurea Initiation: A Cohort Study of Veterans with Diabetes and Chronic Kidney Disease	2018	Irrelevant	To evaluate whether mortality risk differs after the initiation of monotherapy with either metformin or a sulfonylurea in Veterans with type 2 diabetes and CKD.	2021-12-21
21977		The risk of fragility fractures in new users of dipeptidyl peptidase-4 inhibitors compared to sulfonylureas and other anti-diabetic drugs: A cohort study	2018	Irrelevant	Therefore, we conducted a cohort study to determine the association between dipeptidyl peptidase-4 (DPP-4) inhibitors and common osteoporotic “fragility fractures” (upper extremity, hip, spine).	2021-12-21
21979		Association between alcohol consumption and incidence of impaired insulin secretion and insulin resistance in Japanese: The Saku study	2018	Irrelevant	To investigate the effect of alcohol consumption on impaired insulin secretion and insulin resistance in Japanese.	2021-12-21
21981		SMBG and virtual consultation DTMS (®): 20 years' experience	2018	Irrelevant	konference abstract	2021-12-21
21982		Artificial pancreas	2018	Irrelevant	konference abstract	2021-12-21
21983		Evaluation of a weekly physician-driven insulin titration algorithm for a wearable insulin delivery device	2018	relevant	relevant, men muligvis den samme som 21970	2021-12-21
21984		Take control: Efficacy and safety of patient-versus physician-managed titration of insulin glargine 300 U/ML (GLA-300) in patients with uncontrolled type 2 diabetes	2018	relevant	This study evaluated whether the new generation basal insulin Gla-300 empowered patients to self-titrate effectively.	2021-12-21
21985		Blood glucose testing frequency correlates to a1c reduction after 3 months of insulin titration utilizing diabetes therapy management software	2018	Irrelevant	The intention of our study was to compare A1C improvement in two groups: a group that SMBG less vs. a group that SMBG more than half of the prescribed 4 times/day. Handler om basal bolus regime	2021-12-21
21986		Effects of beta cell function related genetic variants on predicting deterioration of glucose tolerance in a 9-year prospective cohort study in the chinese	2018	Irrelevant	We investigated the role of genetic variants of beta cell function in deterioration of glucose tolerance, from a 9-year prospective cohort in the Chinese population	2021-12-21
21987		Effects of insulin resistance related genetic variants on predicting glucose deterioration in a chinese 9 year prospective cohort study	2018	Irrelevant	We investigated the role of genetic variants of insulin resistance in predicting glucose deterioration in a Chinese 9-year prospective study.	2021-12-21
21989		Fracture risk assessment on diabetic patients: FRAX, BMD, BTMs & TBS	2018	Irrelevant	handler ikke om dose guidance	2021-12-21
21990		Clusters of fatty acids in the serum triacylglyceride fraction associate with the disorders of type 2 diabetes	2018	Irrelevant	Our aim was to examine longitudinal associations of triacylglyceride fatty acid (TGFA) composition with insulin sensitivity (IS) and -cell function.	2021-12-21
21991		Use of biphasic insulin aspart 30 in type 2 diabetes treatment: Expert panel recommendations	2018	Irrelevant	expert opinion	2021-12-21
21992		Development and validation of a risk prediction model for severe hypoglycemia in adult patients with type 2 diabetes: A nationwide population-based cohort study	2018	Irrelevant	In this study, a model was developed and validated to predict the risk of SH in adult patients with T2DM.	2021-12-21
23525		Treatment choices for the glycaemic management of patients with type 2 diabetes and chronic kidney disease: Analysis of the SAIL patient linked dataset	2018	Irrelevant	Our aim was to examine real-world prescribing for managing hyperglycaemia in the presence of CKD.	2021-12-21
23551		Effects of obesity on metabolic and cardiovascular outcomes following insulin initiation in patients with type 2 diabetes	2018	Irrelevant	Insulin therapy induces weight gain but whether it causes long term adverse metabolic and CV outcomes in obese patients remains unclear.	2021-12-21
23535		Use of 50/50 Premixed Insulin Analogs in Type 2 Diabetes: Systematic Review and Clinical Recommendations	2017	Irrelevant	review	2021-12-21
23537		Optimizing Glycemic Control Through Titration of Insulin Glargine 100 U/mL: A Review of Current and Future Approaches with a Focus on Asian Populations	2017	Irrelevant	review	2021-12-21
23546		Use of a Novel, Remotely Connected Diabetes Management System Is Associated with Increased Treatment Satisfaction, Reduced Diabetes Distress, and Improved Glycemic Control in Individuals with Insulin-Treated Diabetes: First Results from the Personal Diabetes Management Study	2017	Relevant	e assessed the impact of using the Accu-Chek Connect diabetes management system on treatment satisfaction, diabetes distress, and glycemic control in adults with type 1 diabetes and insulin-treated type 2 diabetes.	2021-12-21
23547		Postoperative Insulin Requirements in Bariatric Surgery	2017	Irrelevant	The goals of the present study were to ( 1) To determine peri-operative glycemic control in patients with type 2 diabetes mellitus (DM) on insulin who have undergone Roux-en-Y gastric bypass (RYGB) and ( 2) to compare pre- and postoperative insulin regimens and dosages in these patients.	2021-12-21
23561		Beyond HbA1c	2017	Irrelevant	handler ikke om dose guidance	2021-12-21
23563		Clinical inertia and its impact on treatment intensification in people with type 2 diabetes mellitus	2017	Irrelevant	review	2021-12-21
23564		The impact of insulin dependence on short-term postoperative complications in diabetic patients undergoing total shoulder arthroplasty	2017	Irrelevant	Whereas diabetes has been associated with increased morbidity after TSA, the impact of insulin dependence on the risk profile of diabetic patients has not been described.	2021-12-21
23595		Cost-effectiveness of exenatide twice daily vs insulin glargine as add-on therapy to oral antidiabetic agents in patients with type 2 diabetes in China	2017	Irrelevant	To estimate the long-term cost-effectiveness of exenatide twice daily vs insulin glargine once daily as add-on therapy to oral antidiabetic agents (OADs) for Chinese patients with type 2 diabetes (T2DM)	2021-12-21
23532		A randomised controlled trial of a duodenal-jejunal bypass sleeve device (EndoBarrier) compared with standard medical therapy for the management of obese subjects with type 2 diabetes mellitus	2017	Irrelevant	handler ikke om dose guidance	2021-12-21
23544		Insulin therapy for adult patients with type 2 diabetes mellitus: a position statement of the Korean Diabetes Association, 2017	2017	Irrelevant	expert opinion	2021-12-21
23550		Pancreatic β-Cell Function and Prognosis of Nondiabetic Patients With Ischemic Stroke	2017	Irrelevant	This study aimed to estimate the association between β-cell dysfunction and prognosis of nondiabetic patients with ischemic stroke.	2021-12-21
23552		Genetic variation of habitual coffee consumption and glycemic changes in response to weight-loss diet intervention: the Preventing Overweight Using Novel Dietary Strategies (POUNDS LOST) trial	2017	Irrelevant	We examined whether the genetic variation determining habitual coffee consumption affected glycemic changes in response to weight-loss dietary interventio	2021-12-21
23556		Decline of insulin therapy and delays in insulin initiation in people with uncontrolled diabetes mellitus	2017	Irrelevant	To design and validate a natural language processing algorithm to identify insulin therapy decline from the text of physician notes, and to determine the prevalence of insulin therapy decline and its impact on insulin initiation.	2021-12-21
23558		Identification of Novel Circulating Biomarkers Predicting Rapid Decline in Renal Function in Type 2 Diabetes: The Fremantle Diabetes Study Phase II	2017	Irrelevant	To assess the ability of plasma apolipoprotein (apo) A-IV (apoA4), apo C-III, CD5 antigen-like (CD5L), complement C1q subcomponent subunit B (C1QB), complement factor H-related protein 2, and insulin-like growth factor binding protein 3 (IBP3) to predict rapid decline in estimated glomerular filtration rate (eGFR) in type 2 diabetes.	2021-12-21
23559		Comparison of tofogliflozin 20 mg and ipragliflozin 50 mg used together with insulin glargine 300 U/mL using continuous glucose monitoring (CGM): A randomized crossover study	2017	Irrelevant	To investigate whether sodium glucose co-transporter 2 inhibitors (SGLT2i), tofogliflozin or ipragliflozin, achieve optimal glycemic variability, when used together with insulin glargine 300 U/mL (Glargine 300).	2021-12-21
23549		DL cholesterol efflux normalised to apoA-I is associated with future development of type 2 diabetes: from the CORDIOPREV trial	2017	Irrelevant	his prospective study evaluated whether baseline cholesterol efflux is associated with future development of type 2 diabetes (T2DM) in cardiovascular patients.	2021-12-21
23557		Computer Simulation Model to Train Medical Personnel on Glucose Clamp Procedures	2017	Relevant	A computer environment that simulates glucose clamp experiments can be used for efficient personnel training and development and testing of algorithms for automated glucose clamps.	2021-12-21
23560		TITRATION: A Randomized Study to Assess 2 Treatment Algorithms with New Insulin Glargine 300 units/mL	2017	Relevant	he objective of this study was to compare safety and efficacy of 2 titration algorithms, INSIGHT and EDITION, for GLA-300 in people with uncontrolled type 2 diabetes mellitus, mainly in a primary care setting.	2021-12-21
23565		Low-Dose Persistent Organic Pollutants Impair Insulin Secretory Function of Pancreatic β-Cells: Human and In Vitro Evidence	2017	Irrelevant	We evaluated whether chronic exposure to low-dose POPs affects insulin secretory function of β-cells in humans and in vitro cells.	2021-12-21
23567		Overcoming clinical inertia in insulin initiation in primary care for patients with type 2 diabetes: 24-month follow-up of the Stepping Up cluster randomised controlled trial	2017	Relevant	To examine the two-year impact of Stepping Up, a general practice based model of care intervention for insulin initiation and titration in Australia.	2021-12-21
23571		Short-term intensive insulin therapy could be the preferred option for new onset Type 2 diabetes mellitus patients with HbA1c > 9	2017	Irrelevant	review	2021-12-21
23573		Factors associated with Prolonged Inaction in the hypoglycaemic treatment in people with non-insulin dependent Type 2 Diabetes and elevated glycated haemoglobin: A registry-based cohort study	2017	Irrelevant	To assess factors associated with Prolonged Inaction (PI) in insulin-naïve patients with Type 2 Diabetes Mellitus (T2DM). PI was defined as the absence of treatment initiation or intensification for ≥12 months despite HbA1c >7% (53mmol/mol).	2021-12-21
23597		Future challenges and therapeutic opportunities in type 2 diabetes: Changing the paradigm of current therapy	2017	Irrelevant	review	2021-12-21
23609		Cardiovascular safety of vildagliptin in patients with type 2 diabetes: A European multi-database, non-interventional post-authorization safety study	2017	Irrelevant	The aim of this non-interventional, multi-database, analytical cohort study was to assess the cardiovascular (CV) safety of vildagliptin vs other non-insulin antidiabetic drugs (NIADs) using real-world data from 5 European electronic healthcare databases.	2021-12-21
23553		Insights into the Hexose Liver Metabolism-Glucose versus Fructose	2017	Irrelevant	Nevertheless, the causal relationship between fructose consumption and metabolic alterations is still debated.	2021-12-21
23555		The (FTO) gene polymorphism is associated with metabolic syndrome risk in Egyptian females: a case- control study	2017	Irrelevant	ariations within fat mass and obesity associated (FTO) gene had crosstalk with obesity risk in European and some Asian populations. This study was designed to investigate FTO rs9939609 association with metabolic syndrome (MetS) as well as biochemical parameters as plasma glucose, serum triacylglycerol (TAG), total cholesterol (TC) and transaminases enzymes in Arab female population from Egypt.	2021-12-21
23562		Risk Factors for Nocturnal Hypoglycemia in Insulin-treated Patients With Type 2 Diabetes: A Secondary Analysis of Observational Data Derived From an Integrated Clinical Trial Database	2017	Irrelevant	Ikke primær litteratur	2021-12-21
23572		Cost-effectiveness of insulin detemir versus insulin glargine for Thai type 2 diabetes from a payer's perspective	2017	Irrelevant	This study aimed to evaluate long-term cost-effectiveness of insulin detemir (IDet) compared with insulin glargine (IGlar) in type 2 diabetes (T2DM) from the Thai payer's perspective.	2021-12-21
23579		Is insulin the preferred treatment for HbA1c >9%?	2017	Irrelevant	handler ikke om dose guidance	2022-01-03
23582		Review of basal-plus insulin regimen options for simpler insulin intensification in people with Type 2 diabetes mellitus	2017	Irrelevant	review om intensivering fra basal til basal-bolus regime	2022-01-03
23583		C-peptide: A predictor of cardiovascular mortality in subjects with established atherosclerotic disease	2017	Irrelevant	To evaluate the possible use of C-peptide as cardiovascular biomarkers,	2022-01-03
23600		Chocolate intake and diabetes risk in postmenopausal American women	2017	Irrelevant	inverse associations between chocolate consumption and the risk of type 2 diabetes, but provided conflicting evidence on the nature of the association among women. To assess this association in a large cohort of American women.	2022-01-03
23526		Inflammation in the Prediction of Type 2 Diabetes and Hypertension in Healthy Adults	2017	Irrelevant	To evaluate inflammatory markers in prediction of type 2 diabetes and hypertension.	2022-01-03
23569		Simulation-Based Evaluation of Dose-Titration Algorithms for Rapid-Acting Insulin in Subjects with Type 2 Diabetes Mellitus Inadequately Controlled on Basal Insulin and Oral Antihyperglycemic Medications	2017	Irrelevant	The purpose of this prospective, model-based simulation approach was to evaluate the impact of various rapid-acting mealtime insulin dose-titration algorithms on glycemic control	2022-01-03
23581		Association of endometrial hyperplasia and cancer with a history of gestational diabetes	2017	Irrelevant	We investigated whether gestational diabetes is associated with increased risk of EC and its precursor, endometrial hyperplasia (EH)	2022-01-03
23584		Implementation of a referral to discharge glycemic control initiative for reduction of surgical site infections in gynecologic oncology patients	2017	Irrelevant	To evaluate the frequency of surgical site infections before and after implementation of a comprehensive, multidisciplinary perioperative glycemic control initiative.	2022-01-03
23586		An RCT Investigating Patient-Driven Versus Physician-Driven Titration of BIAsp 30 in Patients with Type 2 Diabetes Uncontrolled Using NPH Insulin	2017	Irrelevant	The aim of this study was to confirm the efficacy of patient-driven titration of BIAsp 30 in terms of glycemic control, by comparing it to physician-driven titration of BIAsp 30, in patients with type 2 diabetes in North Africa, the Middle East, and Asia. Jeg vil mene at den skal ekskluderes fordi det handler om præmixed insulin, men jeg har ikke nævnt det som et eksklusion kriterie ligesom jeg h…	2022-01-03
23599		Genetic Variation at the Sulfonylurea Receptor, Type 2 Diabetes, and Coronary Heart Disease	2017	Irrelevant	handler ikke om dose guidance	2022-01-03
23566		An information and communication technology-based centralized clinical trial to determine the efficacy and safety of insulin dose adjustment education based on a smartphone personal health record application: a randomized controlled trial	2017	relevant	The aim of this study is to examine the efficacy and safety of insulin dose adjustment based on a smartphone PHR application in patients with diabetes mellitus (DM) and to confirm the validity and stability of an information and communication technology (ICT)-based centralized clinical trial monitoring system. Usikkert om der er en adkilt reportering af resultater for type 1, 2 og den sidste type…	2022-01-03
23591		Elevated α-Hydroxybutyrate and Branched-Chain Amino Acid Levels Predict Deterioration of Glycemic Control in Adolescents	2017	Irrelevant	To identify early metabolic features of insulin resistance (IR) in youth and whether they predict deterioration of glycemic control.	2022-01-03
23604		Metformin and the incidence of viral associated cancers in patients with type 2 diabetes	2017	Irrelevant	This study investigated whether the use of metformin is associated with a reduced risk of viral associated cancers in patients with type 2 diabetes.	2022-01-03
23605		Association between hyperinsulinemia and increased risk of cancer death in nonobese and obese people: A population-based observational study	2017	Irrelevant	We assessed whether hyperinsulinemia is a risk factor for cancer death in nonobese people without diabetes. We conducted a prospective cohort study	2022-01-03
23568		Metformin is associated with fewer major adverse cardiac events among patients with a new diagnosis of type 2 diabetes mellitus: A propensity score-matched nationwide study	2017	Irrelevant	However, it is unclear whether metformin is beneficial for patients with a new diagnosis of DM compared to those who do not need OHAs for glycemic control.	2022-01-03
23574		Maternal BMI and Glycemia Impact the Fetal Metabolome	2017	Irrelevant	We used targeted metabolomics to determine associations of maternal BMI and glucose levels with cord blood metabolites and associations of cord blood metabolites with newborn birth weight and adiposity in mother-offspring dyads.	2022-01-03
23577		Baseline Circulating FGF21 Concentrations and Increase after Fenofibrate Treatment Predict More Rapid Glycemic Progression in Type 2 Diabetes: Results from the FIELD Study	2017	Irrelevant	It is not known whether circulating fibroblast growth factor 21 (FGF21) concentrations are associated with glycemic progression in patients with established type 2 diabetes. This study reports this relationship in type 2 diabetes patients participating in the Fenofibrate Intervention and Event Lowering in Diabetes (FIELD) trial	2022-01-03
23578		The Effect of a Vegetarian vs Conventional Hypocaloric Diabetic Diet on Thigh Adipose Tissue Distribution in Subjects with Type 2 Diabetes: A Randomized Study	2017	Irrelevant	The aim of our study was to compare the effects of a vegetarian and a conventional diet on thigh adipose tissue distribution in subjects with type 2 diabetes (T2D).	2022-01-03
23590		Faster Aspart Versus Insulin Aspart as Part of a Basal-Bolus Regimen in Inadequately Controlled Type 2 Diabetes: The onset 2 Trial	2017	Irrelevant	This multicenter, double-blind, treat-to-target, phase 3 trial evaluated the efficacy and safety of fast-acting insulin aspart (faster aspart) versus insulin aspart (IAsp) in adults with type 2 diabetes receiving basal insulin and oral antidiabetic agents.	2022-01-03
23607		Severe hypoglycemia and hip fracture in patients with type 2 diabetes: a nationwide population-based cohort study	2017	Irrelevant	The objective of the study was to assess the risk of hip fracture among patients with type 2 diabetes mellitus (T2DM) and severe hypoglycemia.	2022-01-03
23611		The effects of dual-therapy intensification with insulin or dipeptidylpeptidase-4 inhibitor on cardiovascular events and all-cause mortality in patients with type 2 diabetes: A retrospective cohort study	2017	Irrelevant	To compare time to a composite endpoint of non-fatal acute myocardial infarction, non-fatal stroke or all-cause mortality in patients with type 2 diabetes mellitus who had their treatment intensified with a dipeptidylpeptidase-4 inhibitor or insulin following dual-therapy (metformin plus sulfonylurea) failure.	2022-01-03
23615		Risk of Nonfatal Stroke in Type 2 Diabetes Mellitus Patients: A Retrospective Comparison Between Disease Management Programs and Standard Care	2017	Irrelevant	The present retrospective study examines the influence of disease management programs on nonfatal stroke in type 2 diabetes mellitus (T2DM) patients in Germany.	2022-01-03
23616		Evaluation of the long-term cost-effectiveness of IDegLira versus liraglutide added to basal insulin for patients with type 2 diabetes failing to achieve glycemic control on basal insulin in the USA	2017	Irrelevant	The aim of the present analysis was to assess the long-term cost-effectiveness of IDegLira vs liraglutide added to basal insulin, for patients with type 2 diabetes not achieving glycemic control on basal insulin in the US setting.	2022-01-03
23630		Longitudinal Associations Between Ambient Air Pollution With Insulin Sensitivity, β-Cell Function, and Adiposity in Los Angeles Latino Children	2017	Irrelevant	The objective of this study was to determine whether exposure to elevated concentrations of nitrogen dioxide (NO(2)) and particulate matter with aerodynamic diameter <2.5 (PM(2.5)) had adverse effects on longitudinal measures of insulin sensitivity (S(I)), β-cell function, and obesity in children at high risk for developing diabetes.	2022-01-03
23542		Outpatient management of steroid-induced hyperglycaemia and steroid-induced diabetes in people with lymphoproliferative disorders treated with intermittent high dose steroids	2017	Irrelevant	We implemented a protocol for detection and management of SID and steroid-induced hyperglycamia (SIH) in haematology outpatients receiving HDS.	2022-01-03
23592		Murine model and mechanisms of treatment-induced painful diabetic neuropathy	2017	Irrelevant	we developed chronic and acute insulin-induced neuropathic pain in mice with type 2 insulin-resistant diabetes.	2022-01-03
23575		The American Heart Association Ideal Cardiovascular Health and Incident Type 2 Diabetes Mellitus Among Blacks: The Jackson Heart Study	2017	Irrelevant	The concept of ideal cardiovascular health (CVH), defined by the American Heart Association primarily for coronary heart disease and stroke prevention, may apply to diabetes mellitus prevention among blacks.	2022-01-03
23576		Insulin use and Excess Fracture Risk in Patients with Type 2 Diabetes: A Propensity-Matched cohort analysis	2017	Irrelevant	The aim of this study was to assess the association between insulin use and bone fracture risk in T2DM patients.	2022-01-03
23580		The Association between Depression and Medication Nonpersistence in New Users of Antidiabetic Drugs	2017	Irrelevant	To measure the association between depression and nonpersistence with antidiabetic drugs (ADs) among new users of oral ADs and to estimate factors associated with nonpersistence among these new users with depression.	2022-01-03
23585		Impact of Muscarinic M(3) Receptor Antagonism on the Risk of Type 2 Diabetes in Antidepressant-Treated Patients: A Case-Controlled Study	2017	Irrelevant	Our objective was to examine the risk of type 2 diabetes mellitus (T2DM) in patients using antidepressants with and without M(3) muscarinic receptor antagonism (AD_antaM(3) and AD_nonantaM(3), respectively).	2022-01-03
23598		Translating U-500R Randomized Clinical Trial Evidence to the Practice Setting: A Diabetes Educator/Expert Prescriber Team Approach	2017	Irrelevant	The purpose of this article is to provide recommendations to the diabetes educator/expert prescriber team for the use of human regular U-500 insulin (U-500R) in patients with severely insulin-resistant type 2 diabetes, including its initiation and titration, by utilizing dosing charts and teaching materials translated from a recent U-500R clinical trial expert opioin	2022-01-03
23603		Risk factors for diabetic macular oedema in type 2 diabetes: A case-control study in a United Kingdom primary care setting	2017	Irrelevant	To identify risk factors associated with the development of DMO among patients diagnosed with type 2 diabetes managed in a primary care setting in the UK.	2022-01-03
23606		Insulin Resistance Predicts Cognitive Decline: An 11-Year Follow-up of a Nationally Representative Adult Population Sample	2017	Irrelevant	The aim of this study was to examine whether insulin resistance, assessed by HOMA of insulin resistance (HOMA-IR), is an independent predictor of cognitive decline.	2022-01-03
23614		Impact of health policy and practice on finding the best fit for patients with type 2 diabetes after metformin failure: Croatian pilot study	2017	Irrelevant	We assessed the impact of clinical practice and health policy on the choice and efficacy of different second-line therapies for the treatment of type 2 diabetes (T2DM) after failure of metformin.	2022-01-03
23631		Safety and efficacy of IDegLira titrated once weekly versus twice weekly in patients with type 2 diabetes uncontrolled on oral antidiabetic drugs: DUAL VI randomized clinical trial	2017	relevant	To compare the safety and efficacy of a simpler titration algorithm for insulin degludec/liraglutide (IDegLira) with that used in previous DUAL trials in insulin-naïve patients with type 2 diabetes.	2022-01-03
23633		Novel oral glucose-lowering drugs are associated with lower risk of all-cause mortality, cardiovascular events and severe hypoglycaemia compared with insulin in patients with type 2 diabetes	2017	Irrelevant	To investigate the association of novel oral glucose-lowering drugs (GLDs), compared with that of insulin, with risk of all-cause mortality, cardiovascular disease (CVD) and severe hypoglycaemia.	2022-01-03
23692		Exploring the role of the patient-physician relationship on insulin adherence and clinical outcomes in type 2 diabetes: Insights from the MOSAIc study	2017	Irrelevant	study is investigating whether patient-, physician-, and health system-related factors affect outcomes in patients with type 2 diabetes (T2D)	2022-01-03
23589		Lipopolysaccharide-binding protein is associated with arterial stiffness in patients with type 2 diabetes: a cross-sectional study	2017	Irrelevant	In this study, we aimed to investigate the relationship between serum LBP levels and arterial stiffness in patients with type 2 diabetes.	2022-01-03
23588		Using a patient decision aid for insulin initiation in patients with type 2 diabetes: a qualitative analysis of doctor-patient conversations in primary care consultations in Malaysia	2017	relevant	To investigate whether the use of apatient decision aid (PDA) for insulin initiation fulfils its purpose of facilitating patient-centred decision-making through identifying how doctors and patients interact when using the PDA during primary care consultations. Usikkert hvorvidt dose guidance er en del af det systemet guider	2022-01-03
23608		Antihyperglycemic drugs use and new-onset atrial fibrillation in elderly patients	2017	Irrelevant	In this study, we investigated the association between different classes of antihyperglycemic drugs and NAF in elderly patients.	2022-01-03
23618		Low Serum Sex Hormone-Binding Globulin Associated with Insulin Resistance in Men with Nonalcoholic Fatty Liver Disease	2017	Irrelevant	The study aims to clarify the association between SHBG and IR in patients with NAFLD.	2022-01-03
23622		The haemoglobin glycation index as predictor of diabetes-related complications in the AleCardio trial	2017	Irrelevant	We investigated the relevance of HGI as independent predictor of complications by using data of the AleCardio trial.	2022-01-03
23623		Biomedical Informatics Approaches to Identifying Drug-Drug Interactions: Application to Insulin Secretagogues	2017	Irrelevant	. We aimed to systematically screen for drugs that interact with the five most commonly used secretagogues-glipizide, glyburide, glimepiride, repaglinide, and nateglinide-to cause serious hypoglycemia	2022-01-03
23626		Ambient ozone and incident diabetes: A prospective analysis in a large cohort of African American women	2017	Irrelevant	In this paper, we investigate the association between ozone and incident type 2 diabetes in a large cohort of African American women.	2022-01-03
23679		A retrospective cohort analysis of hypoglycaemic and cardiovascular agent use in young adults in the Irish primary care setting	2017	Irrelevant	This study aimed to describe hypoglycaemic and cardiovascular treatment patterns in young adults newly treated with oral hypoglycaemic agents.	2022-01-03
23703		Metformin, other antidiabetic drugs, and endometrial cancer risk: a nested case-control study within Italian healthcare utilization databases	2017	Irrelevant	We investigated this issue using data from a nested case-control study within the healthcare utilization databases of the Lombardy Region, Italy.	2022-01-03
23635		Personalized glucose-insulin model based on signal analysis	2017	relevant	måske relevant - The insulin dosing time scale can be accurately adjusted to match the individual requirements of characterized diabetic patients without the physical burden of treatment	2022-01-03
23601		Evaluating the role of race and medication in protection of uterine fibroids by type 2 diabetes exposure	2017	Irrelevant	To further evaluate the relationship between T2D and UFs we tested for association between T2D and UF risk in a large clinical population as well as the potential differences due to T2D medications and interaction with race.	2022-01-03
23594		Markers of arterial health could serve as accurate non-invasive predictors of human biological and chronological age	2017	Irrelevant	Here we present simple, accurate and cost-efficient techniques for estimation of human biological age, Male and Female Arterial Indices	2022-01-03
23596		American Association of Clinical Endocrinologists and American College of Endocrinology Guidelines for Management of Dyslipidemia and Prevention of Cardiovascular Disease	2017	Irrelevant	The development of these guidelines is mandated by the American Association of Clinical Endocrinologists (AACE) Board of Directors and American College of Endocrinology (ACE) Board of Trustees and adheres with published AACE protocols for the standardized production of clinical practice guidelines (CPGs). expert opioin	2022-01-03
23613		Insulin and Glucagon-Like Peptide 1 Receptor Agonist Combination Therapy in Type 2 Diabetes: A Systematic Review and Meta-analysis of Randomized Controlled Trials	2017	Irrelevant	We performed a meta-analysis of randomized controlled trials (RCTs) comparing this combination strategy to other injectable antidiabetes treatments on metabolic control in adult patients with type 2 diabetes.	2022-01-03
23624		Smokeless tobacco (snus) is associated with an increased risk of type 2 diabetes: results from five pooled cohorts	2017	Irrelevant	To explore the association between snus use and risk of type 2 diabetes using pooled data from five cohorts.	2022-01-03
23645		Time-Varying Risk for Breast Cancer Following Initiation of Glucose-Lowering Therapy in Women with Type 2 Diabetes: Exploring Detection Bias	2017	Irrelevant	To explore detection bias in the association between glucose-lowering therapies and breast cancer in a cohort of women with type 2 diabetes	2022-01-03
23687		Mediators and Moderators of Improvements in Medication Adherence	2017	relevant	In a randomized controlled trial we compared two models of community health worker-led diabetes medication decision support for low-income Latino and African American adults with diabetes.	2022-01-03
23712		Prediction of excessive weight gain in insulin treated patients with type 2 diabetes	2017	Irrelevant	The aim of the present study was to identify predictors of weight gain in insulin-treated patients with T2DM.	2022-01-03
23617		The endoplasmic reticulum stress/autophagy pathway is involved in cholesterol-induced pancreatic β-cell injury	2017	Irrelevant	he current study explored the role of the endoplasmic reticulum (ER) stress pathway in cholesterol-induced lipotoxicity. T	2022-01-03
23602		Intake of different dietary proteins and risk of type 2 diabetes in men: the Kuopio Ischaemic Heart Disease Risk Factor Study	2017	Irrelevant	We investigated the associations of dietary proteins with the risk of incident T2D in Finnish men from the prospective Kuopio Ischaemic Heart Disease Risk Factor Study.	2022-01-03
23619		Novel inflammatory markers for incident pre-diabetes and type 2 diabetes: the Rotterdam Study	2017	Irrelevant	We aimed to identify novel inflammatory markers that predict progression from normoglycemia to pre-diabetes, incident T2D and insulin therapy.	2022-01-03
23621		Real-World Glycemic Control from GLP-1RA Therapy with and Without Concurrent Insulin in Patients with Type 2 Diabetes	2017	Irrelevant	To identify glycemic response with GLP-1RAs by insulin use in patients with T2D at 1-year follow-up to inform decisions regarding GLP-1RA use with or without insulin	2022-01-03
23636		Novel Protein Glycan-Derived Markers of Systemic Inflammation and C-Reactive Protein in Relation to Glycemia, Insulin Resistance, and Insulin Secretion	2017	Irrelevant	we aimed to examine the relation of GlycA, GlycB, and C-reactive protein (CRP) to direct measures of insulin sensitivity (insulin sensitivity index [S(I)]) and insulin secretion (acute insulin response [AIR]).	2022-01-03
23637		Serum Levels of Apolipoproteins and Incident Type 2 Diabetes: A Prospective Cohort Study	2017	Irrelevant	We aimed to investigate the role of serum levels of various apolipoproteins on the risk for type 2 diabetes (T2D).	2022-01-03
23641		Long-term use of dipeptidyl peptidase-4 inhibitors and risk of fracture: A retrospective population-based cohort study	2017	Irrelevant	To investigate the association between long-term dipeptidyl peptidase-4 (DPP-4) inhibitor use and risk of fracture among people with type 2 diabetes mellitus (T2DM).	2022-01-03
23646		Use of incretin agents and risk of acute and chronic pancreatitis: A population-based cohort study	2017	Irrelevant	To determine the association between the use of incretin agents (dipeptidyl peptidase-4 inhibitors and glucagon-like peptide-1 receptor agonists) for the treatment of type 2 diabetes mellitus (T2DM) and the risk of any, acute and chronic pancreatitis.	2022-01-03
23650		A real-world study of treatment patterns and outcomes in US managed-care patients with type 2 Diabetes initiating injectable therapies	2017	relevant	Examine real-world outcomes in patients with type 2 diabetes mellitus (T2DM) initiating injectable therapy as part of the Initiation of New Injectable Treatment Introduced after Antidiabetic Therapy with Oral-only Regimens (INITIATOR) study. Usikkert om insulin titrering er en del af noget	2022-01-03
23676		Insulin degludec/insulin aspart vs biphasic insulin aspart 30 twice daily in Japanese patients with type 2 diabetes: A randomized controlled trial	2017	Irrelevant	The present exploratory trial investigated the safety of switching unit-to-unit from twice-daily basal or pre-mix insulin to twice-daily IDegAsp in Japanese patients with type 2 diabetes.	2022-01-03
23717		Clinical inertia causing new or progression of diabetic retinopathy in type 2 diabetes: A retrospective cohort study	2017	Irrelevant	The aim of the present study was to demonstrate the effects of clinical inertia on glycemic control and diabetes-related complications.	2022-01-03
23761		Dietary magnesium intake and the risk of diabetes in the Japanese community: results from the Takayama study	2017	Irrelevant	We investigated whether magnesium intake is related to the risk of developing diabetes in a population-based cohort study in Japan.	2022-01-03
23642		Elevated plasma levels of copeptin linked to diabetic retinopathy in type 2 diabetes	2017	Irrelevant	The aim of this study was to evaluate the role of plasma copeptin in Chinese patients with type 2 diabetes mellitus (T2DM) with and without diabetic retinopathy (DR).	2022-01-03
23649		Effect of statin on hepatocellular carcinoma in patients with type 2 diabetes: A nationwide nested case-control study	2017	Irrelevant	Relationship on new statin use and the risk of hepatocellular carcinoma (HCC) in patients with incident type 2 diabetes mellitus (T2DM), who might be at the risk of developing HCC, is uncertained.	2022-01-03
23625		Increased dementia risk predominantly in diabetes mellitus rather than in hypertension or hyperlipidemia: a population-based cohort study	2017	Irrelevant	his study investigated whether incident hypertension, incident hyperlipidemia, or both, increased the dementia risk in patients with and without DM.	2022-01-03
23627		A Synthetic-Biology-Inspired Therapeutic Strategy for Targeting and Treating Hepatogenous Diabetes	2017	Irrelevant	handler ikke om dose guindance	2022-01-03
23656		Prospective study of Type 2 diabetes mellitus, anti-diabetic drugs and risk of prostate cancer	2017	Irrelevant	Type 2 diabetes mellitus (T2DM) has consistently been associated with decreased risk of prostate cancer; however, if this decrease is related to the use of anti-diabetic drugs is unknown.	2022-01-03
23593		Consensus on Insulin Dose and Titration Algorithms in Ambulatory Care of Type 2 Diabetes in India	2017	Irrelevant	expert opinion	2022-01-03
23620		Practical Focus on American Diabetes Association/European Association for the Study of Diabetes Consensus Algorithm in Patients with Type 2 Diabetes Mellitus: Timely Insulin Initiation and Titration (Iran-AFECT)	2017	relevant	The aim of this study was to evaluate the safety and effectiveness of insulin glargine in a large population from a variety of clinical care in Iranian people with type 2 diabetes mellitus (T2DM) and to measure the percentage of patients achieving glycosylated hemoglobin (HbA1c) <7% by the end of 24 weeks of treatment in routine clinical practice	2022-01-03
23640		Serum potassium is a predictor of incident diabetes in African Americans with normal aldosterone: the Jackson Heart Study	2017	Irrelevant	We sought to confirm the association between potassium and incident diabetes in an African-American cohort, and to determine the effect of aldosterone on this association	2022-01-03
23644		Interaction of sex steroid hormones and obesity on insulin resistance and type 2 diabetes in men: the Third National Health and Nutrition Examination Survey	2017	Irrelevant	We examined interaction of sex steroid hormones and obesity with regard to insulin resistance (IR) and type 2 diabetes (T2D) by using nationally representative data from the US	2022-01-03
23647		Treatment persistence in the use of basal insulins in Poland and Germany	2017	Irrelevant	To compare short-term basal insulin therapy persistence and its predictors in Poland and Germany.	2022-01-03
23651		Diet-dependent acid load and type 2 diabetes: pooled results from three prospective cohort studies	2017	Irrelevant	This study aimed to assess whether diet-dependent acid load is associated with the risk of type 2 diabetes.	2022-01-03
23652		Tumor Necrosis Factor-α is Inversely Related to Free Thyroxine in Euthyroid Subjects Without Diabetes	2017	Irrelevant	handler ikke om dose guidance	2022-01-03
23653		Fatty acid intake and its dietary sources in relation with markers of type 2 diabetes risk: The NEO study	2017	Irrelevant	The aim of this study was to examine the relations between intakes of total, saturated, mono-unsaturated, poly-unsaturated and trans fatty acids (SFA, MUFA, PUFA and TFA), and their dietary sources (dairy, meat and plant) with markers of type 2 diabetes risk.	2022-01-03
23654		Betamethasone-exposed preterm birth does not impair insulin action in adult sheep	2017	Irrelevant	We therefore investigated the effect of preterm birth at ~0.9 of term after antenatal maternal betamethasone on insulin sensitivity, secretion and key determinants in adulthood, in a clinically relevant animal model	2022-01-03
23660		ADAMTS13 activity as a novel risk factor for incident type 2 diabetes mellitus: a population-based cohort study	2017	Irrelevant	Here, we determine whether ADAMTS13 activity and VWF antigen are associated with incident diabetes.	2022-01-03
23668		Patterns of anti-diabetic medication use in patients with type 2 diabetes mellitus in England and Wales	2017	Irrelevant	The purpose of this study is to characterise how Type 2 Diabetes Mellitus (T2DM) is treated in England and Wales and whether this adheres to 2009 National Institute for Health and Care Excellence (NICE) guidance on management of T2DM.	2022-01-03
23700		Effectiveness of intensification therapies in Danes with Type 2 diabetes who use basal insulin: a population-based study	2017	Irrelevant	To examine the usage and real-life effectiveness of intensification therapies in people with Type 2 diabetes treated with basal insulin.	2022-01-03
23722		Serum brain-derived neurotrophic factor levels and sleep disorders in Chinese healthy and newly diagnosed type 2 diabetic subjects	2017	Irrelevant	The aims of the present study were to detect serum brain-derived neurotrophic factor (BDNF) protein concentrations in healthy and diabetic subjects with sleep disorders and to explore correlations among serum BDNF concentrations, metabolic parameters and inflammation.	2022-01-03
23749		Factors associated with early insulin initiation in Type 2 diabetes: a Canadian cross-sectional study	2017	Irrelevant	To examine the patient characteristics associated with early initiation of insulin after a diagnosis of Type 2 diabetes.	2022-01-03
23753		Insulin degludec/insulin aspart once daily in Type 2 diabetes: a comparison of simple or stepwise titration algorithms (BOOST(®) : SIMPLE USE)	2017	Irrelevant	To compare the efficacy and safety of two titration algorithms for insulin degludec/insulin aspart (IDegAsp) administered once daily with metformin in participants with insulin-naïve Type 2 diabetes mellitus. Er basal-bolus regime	2022-01-03
23628		Serum levels of interleukin-22, cardiometabolic risk factors and incident type 2 diabetes: KORA F4/FF4 study	2017	Irrelevant	We aimed to identify correlates of serum IL-22 levels and to test the hypothesis that higher IL-22 levels are associated with lower diabetes incidence.	2022-01-03
23632		Risk of disseminated intravascular coagulation in patients with type 2 diabetes mellitus: retrospective cohort study	2017	Irrelevant	Risk of disseminated intravascular coagulation in patients with type 2 diabetes mellitus: retrospective cohort study	2022-01-03
23629		Barriers that practitioners face when initiating insulin therapy in general practice settings and how they can be overcome	2017	Irrelevant	To explore primary care physicians' perspectives on possible barriers to the use of insulin.	2022-01-03
23655		Female sex, young age, northern German residence, hypoglycemia and disabling diabetes complications are associated with depressed mood in the WHO-5 questionnaire - A multicenter DPV study among 17,563 adult patients with type 2 diabetes	2017	Irrelevant	We investigated the frequency of depressed mood and its association with diabetes-related factors in a large type 2 diabetes (T2D) cohort from real-life care in Germany.	2022-01-03
23643		Rosiglitazone reduces breast cancer risk in Taiwanese female patients with type 2 diabetes mellitus	2017	Irrelevant	Rosiglitazone reduces breast cancer risk in Taiwanese female patients with type 2 diabetes mellitus	2022-01-03
23648		Association of insulin dosage with mortality or major adverse cardiovascular events: a retrospective cohort study	2017	Irrelevant	We aimed to quantify the association between increasing dosage of insulin exposure and death and cardiovascular events, while taking into account time-dependent confounding and mediation that might have biased previous studies.	2022-01-03
23663		Addition of or switch to insulin therapy in people treated with glucagon-like peptide-1 receptor agonists: A real-world study in 66 583 patients	2017	Irrelevant	Real world outcomes of addition or switch to insulin therapy in type 2 diabetes (T2DM) patients on glucagon-like paptide-1 receptor agonist (GLP-1RA) with inadequately controlled hyperglycaemia, are not known.	2022-01-03
23672		Sitagliptin and risk of fractures in type 2 diabetes: Results from the TECOS trial	2017	Irrelevant	To examine fracture incidence among participants in the Trial Evaluating Cardiovascular Outcomes with Sitagliptin (TECOS).	2022-01-03
23673		Development of an Ambulatory Clinical Pharmacy Prioritization Prediction Model for Patients With Diabetes	2017	Irrelevant	To develop a prediction model using patient factors to assist in selecting patients with diabetes most likely to benefit from pharmacy interventions.	2022-01-03
20932		Analysis of population-specific pharmacogenomic variants using next-generation sequencing data/6	2017	Irrelevant	handler ikke om dose guidance	2022-01-03
20934		Estimating the effects of second-line therapy for type 2 diabetes mellitus: Retrospective cohort study	2017	Irrelevant	We compare the counterfactual drug effectiveness in lowering glycated hemoglobin (HbA1c) levels and effect on body mass index (BMI) of four diabetes second-line drug classes using electronic health records.	2022-01-03
20937		A Simplified Approach Using Rate of Change Arrows to Adjust Insulin With Real-Time Continuous Glucose Monitoring	2017	Irrelevant	handler ikke om dose guidance	2022-01-03
20940		The place of DPP-4 inhibitors in the treatment algorithm of diabetes type 2: a systematic review of cost-effectiveness studies	2017	Irrelevant	review	2022-01-03
20941		Effectiveness and safety of dipeptidyl peptidase 4 inhibitors in the management of type 2 diabetes in older adults: A systematic review and development of recommendations to reduce inappropriate prescribing	2017	Irrelevant	review	2022-01-03
20942		Efficacy and safety of metformin in the management of type 2 diabetes mellitus in older adults: A systematic review for the development of recommendations to reduce potentially inappropriate prescribing	2017	Irrelevant	review	2022-01-03
20949		Type 2 diabetes specialty clinic model for the accountable care organization era	2017	Irrelevant	We developed an advanced type 2 specialty clinic model, geared toward frequent remote clinical interventions while limiting face-to-face clinic visits.	2022-01-03
20955		Effects of dipeptidyl peptidase-4 inhibitor sitagliptin on coronary atherosclerosis as assessed by intravascular ultrasound in type 2 diabetes mellitus with coronary artery disease	2017	Irrelevant	It is unclear whether the addition of dipeptidyl peptidase-4 inhibitors (DPP4-I) to statins may cause coronary plaque regression in type 2 diabetes mellitus (T2DM) patients with coronary artery disease (CAD).	2022-01-03
20957		Cost-utility analysis of bariatric surgery compared with conventional medical management in Germany: A decision analytic modeling	2017	Irrelevant	The objective was to evaluate cost-utility of bariatric surgery in Germany for a lifetime and 10-year horizon from a health care payer perspective	2022-01-03
20959		Randomized Controlled Trial of Technology-Assisted Case Management in Low Income Adults with Type 2 Diabetes	2017	relevant	To assess the efficacy of technology-assisted case management (TACM) with medication titration by nurses using guideline-based algorithms, under physician supervision in improving glycemic control in low-income rural adults with poorly controlled type 2 diabetes.	2022-01-03
20964		Model for Simulating Fasting Glucose in Type 2 Diabetes and the Effect of Adherence to Treatment	2017	relevant	The primary goal of this paper is to predict fasting glucose levels in type 2 diabetes (T2D) in long-acting insulin treatment. The paper presents a model for simulating insulin-glucose dynamics in T2D patients. Måske er der noget dose guidance af basal insulin i den her, men usikkert	2022-01-03
20965		Postauthorization safety study of the DPP-4 inhibitor saxagliptin: A largescale multinational family of cohort studies of five outcomes	2017	Irrelevant	To evaluate the risk of serious adverse events among patients with type 2 diabetes mellitus initiating saxagliptin compared with oral antidiabetic drugs (OADs) in classes other than dipeptidyl peptidase-4 (DPP-4) inhibitors.	2022-01-03
20966		An aggregate biomarker risk score predicts high risk of near-term myocardial infarction and death: Findings from BARI 2D (Bypass Angioplasty Revascularization Investigation 2 Diabetes)	2017	Irrelevant	Handler ikke om dose guidance	2022-01-03
20967		Impact of Gender on Satisfaction and Confidence in Cholesterol Control among Veterans at Risk for Cardiovascular Disease	2017	Irrelevant	We evaluated (1) whether satisfaction with lipid control and confidence in ability to improve it vary by gender and (2) whether sociodemographic characteristics modify the association.	2022-01-03
20969		Efficacy of the telemedical lifestyle intervention program TeLiPro in advanced stages of type 2 diabetes: A randomized controlled trial	2017	Irrelevant	Lifestyle interventions are the foundation of treatment in newly diagnosed type 2 diabetes. However, their therapeutic potential in advanced disease stages is unknown. We evaluated the efficacy of the Telemedical Lifestyle intervention Program (TeLiPro) in improving metabolic control in advanced-stage type 2 diabetes.	2022-01-03
20975		Long-term Metformin Therapy and Monitoring for Vitamin B12 Deficiency Among Older Veterans	2017	Irrelevant	To examine the association between long-term metformin therapy and serum vitamin B12 monitoring.	2022-01-03
20979		Mediators and Moderators of Improvements in Medication Adherence: Secondary Analysis of a Community Health Worker–Led Diabetes Medication Self-Management Support Program	2017	relevant	In a randomized controlled trial we compared two models of community health worker–led diabetes medication decision support for low-income Latino and African American adults with diabetes.	2022-01-03
20980		Effectiveness of computer automation for the diagnosis and management of childhood type 2 diabetes a randomized clinical trial	2017	Irrelevant	To determine the feasibility and effectiveness of a computerized clinical decision support system to identify pediatric patients at high risk for T2D and to coordinate screening for and diagnosis of prediabetes and T2D.	2022-01-03
20981		Systemic inflammation and family history in relation to the prevalence of type 2 diabetes based on an alternating decision tree	2017	Irrelevant	To investigate unknown patterns associated with type 2 diabetes in the Japanese population, we first used an alternating decision tree (ADTree) algorithm, a powerful classification algorithm from data mining, for the data from 1,102 subjects aged 35–69 years.	2022-01-03
20983		A statistical method for the conservative adjustment of false discovery rate (q-value)	2017	Irrelevant	q-value is a widely used statistical method for estimating false discovery rate (FDR), which is a conventional significance measure in the analysis of genome-wide expression data. q-value is a random variable and it may underestimate FDR in practice. An underestimated FDR can lead to unexpected false discoveries in the follow-up validation experiments. This issue has not been well addressed in li…	2022-01-03
20984		Systematic screening of Retinopathy in Diabetes (REaD project): An Italian implementation campaign	2017	Irrelevant	To evaluate the use of telemedicine retinal screening in Italy and to identify potential elements of implementation of this system.	2022-01-03
20985		Utilization of "Stand-By" Extracorporeal Membrane Oxygenation in a High-Risk Parturient With Methamphetamine-Associated Cardiomyopathy Undergoing Dilation and Evacuation: A Case Report	2017	Irrelevant	handler ikke om dose guidance	2022-01-03
20987		The effect of text message support on diabetes self-management in developing countries – A randomised trial	2017	relevant	mHealth interventions have the potential to facilitate self-management. This TEXT4DSM study implemented a mobile phone intervention in existing diabetes programmes in three low- and middle-income countries (Democratic Republic of Congo, Cambodia, and the Philippines). usikkert om det handler om dose guidance	2022-01-03
20988		Metformin and the risk of prostate cancer across racial/ethnic groups: A population-based cohort study	2017	Irrelevant	Men with diabetes may have a lower risk of prostate cancer than men without diabetes which may be altered by metformin use or race/ethnicity.	2022-01-03
20989		Bariatric surgery for obesity and metabolic disorders: State of the art	2017	Irrelevant	handler ikke om dose guidance	2022-01-03
20991		Cost-effectiveness analysis for a tele-based health coaching program for chronic disease in primary care	2017	relevant	The objective of this study was to evaluate a cost-effectiveness analysis of a tele-based health-coaching intervention among patients with type 2 diabetes (T2D), coronary artery disease (CAD) and congestive heart failure (CHF).	2022-01-03
20992		A core outcome set for evaluating self-management interventions in people with comorbid diabetes and severe mental illness: Study protocol for a modified Delphi study and systematic review	2017	Irrelevant	review	2022-01-03
20996		mHealth and the management of chronic conditions in rural areas: a note of caution from southern India	2017	Irrelevant	This article examines challenges facing implementation of likely mHealth programmes in rural India.	2022-01-03
20997		SAF score and mortality in NAFLD after up to 41 years of follow-up	2017	Irrelevant	A new score for the histological severity of nonalcoholic fatty liver disease (NAFLD), called SAF (Steatosis, Activity and Fibrosis) has been developed. We aimed to evaluate the impact of this score on overall mortality	2022-01-03
20999		Reduced Inspiratory Muscle Strength in Patients with Type 2 Diabetes Mellitus and Obstructive Sleep Apnoea	2017	Irrelevant	The aim of this study was to investigate the IMS in patients with T2DM, with or without OSA.	2022-01-03
21000		Effectiveness of digital medicines to improve clinical outcomes in patients with uncontrolled hypertension and type 2 diabetes: Prospective, open-label, cluster-randomized pilot clinical trial	2017	Irrelevant	The aim of this study was to assess the impact on clinic-measured blood pressure (BP) and glycated hemoglobin (HbA1c) using a digital medicine offering (DMO) that measures medication ingestion adherence, physical activity, and rest using digital medicines (medication taken with ingestible sensor), wearable sensor patches, and a mobile device app.	2022-01-03
21007		A non-exercise method to determine cardiorespiratory fitness identifies females predicted to be at 'high risk' of type 2 diabetes	2017	Irrelevant	This study examined the relationship between cardiorespiratory fitness determined by a non-exercise testing method for estimating fitness and predicted risk of developing type 2 diabetes mellitus using five risk assessments/questionnaire	2022-01-03
21008		Metabolic Surgery in the Treatment Algorithm for Type 2 Diabetes: a Joint Statement by International Diabetes Organizations	2017	Irrelevant	The 2nd Diabetes Surgery Summit (DSS-II), an international consensus conference, was convened in collaboration with leading diabetes organizations to develop global guidelines to inform clinicians and policymakers about benefits and limitations of metabolic surgery for T2D.	2022-01-03
21995		The Association of Emergency Department Treatments for Hyperglycemia with Glucose Reduction and Emergency Department Length of Stay	2017	Irrelevant	We sought to determine the magnitude of the association between glucose-lowering therapies and 1) actual glucose reduction and 2) ED length of stay (LOS).	2022-01-03
21999		Use of a Novel, Remotely Connected Diabetes Management System Is Associated with Increased Treatment Satisfaction, Reduced Diabetes Distress, and Improved Glycemic Control in Individuals with Insulin-Treated Diabetes: First Results from the Personal Diabetes Management Study	2017	relevant	We assessed the impact of using the Accu-Chek Connect diabetes management system on treatment satisfaction, diabetes distress, and glycemic control in adults with type 1 diabetes and insulin-treated type 2 diabetes	2022-01-03
22000		Predictors of incident fractures in obese subjects with type 2 diabetes mellitus	2017	Irrelevant	We have linked the Swedish National Diabetes Register (NDR) with the Swedish National Patient Register (NPR) in order to study predictors of incident fractures in obese subjects with T2DM.	2022-01-03
22001		Type 2 diabetes mellitus strongly impacts survival in patients with diffuse large b cell lymphoma	2017	Irrelevant	The objective of this study was to assess the prognostic impact of T2DM on diffuse large B cell lymphoma (DLBCL) survival.	2022-01-03
22002		Metformin and the incidence of lymphoid malignancies in patients with type 2 diabetes	2017	Irrelevant	Thus, we examined whether metformin use is associated with reduced risk of LM in patients with type 2 diabetes.	2022-01-03
22005		Association of type 2 diabetes mellitus with the interaction between low-density lipoprotein receptor-related protein 5 (LRP5) polymorphisms and overweight and obesity in rural Chinese adults	2017	Irrelevant	The present cohort study evaluated associations of LRP5 variants with the incidence of type 2 diabetes mellitus (T2DM) in a rural adult Chinese population.	2022-01-03
22006		Incremental cost-effectiveness of algorithm-driven genetic testing versus no testing for Maturity Onset Diabetes of the Young (MODY) in Singapore	2017	Irrelevant	This study tests whether a novel algorithm-driven genetic testing strategy for MODY is incrementally cost-effective relative to the setting of no testing.	2022-01-03
22009		Comparison of different types of insulin added to Glimepiride as initial insulin therapy for patients insufficiently controlled by oral antidiabetic agents	2017	Irrelevant	To compare the efficacy and safety of adding once-daily basal insulin versus twice-daily premixed insulin to glimepiride in type 2 diabetic patients insufficiently controlled by oral antidiabetic agents (OADs).	2022-01-03
22011		Risk factors for type 2 diabetes after gestational diabetes: A population-based cohort study	2017	Irrelevant	We aimed to determine incidence of and risk factors for type 2 diabetes after a pregnancy affected by gestational diabetes.	2022-01-03
22012		HDL cholesterol efflux normalised to apoA-I is associated with future development of type 2 diabetes: from the CORDIOPREV trial	2017	Irrelevant	This prospective study evaluated whether baseline cholesterol efflux is associated with future development of type 2 diabetes (T2DM) in cardiovascular patients.	2022-01-03
22013		Intraclass differences in the risk of hospitalization for heart failure among patients with type 2 diabetes initiating a dipeptidyl peptidase-4 inhibitor or a sulphonylurea: Results from the OsMed Health-DB registry	2017	Irrelevant	To re-analyse data from a previous retrospective study on 127 555 patients, in which we showed that dipeptidyl peptidase-4 (DPP-4) inhibitor therapy was associated with a lower risk of hospitalization for HF (HHF) than sulphonylurea (SU) therapy, in order to evaluate intraclass differences among DPP-4 inhibitors and SUs	2022-01-03
22017		Low-dose persistent organic pollutants impair insulin secretory function of pancreatic b-cells: Human and in vitro evidence	2017	Irrelevant	We evaluated whether chronic exposure to low-dose POPs affects insulin secretory function of b-cells in humans and in vitro cells	2022-01-03
22018		Practical Approach to Initiating SGLT2 Inhibitors in Type 2 Diabetes	2017	Irrelevant	handler ikke om basal insulin	2022-01-03
22019		Diabetes, duration of diabetes, use of anti-diabetic medications, and risk of hepatocellular carcinoma	2017	Irrelevant	However it remains unknown whether the duration of diabetes or the use of insulin or oral anti-diabetic medications contributes to or modifies HCC risk.	2022-01-03
22020		Long-term outcomes of diabetic patients with non-alcoholic fatty liver disease (NAFLD)	2017	Irrelevant	handler ikke om dose guidance	2022-01-03
22022		A combination of plasma phospholipid fatty acids and its association with incidence of type 2 diabetes: The EPIC-InterAct case-cohort study	2017	Irrelevant	he association of a combination of fatty acids with incident type 2 diabetes (T2D) has not been evaluated.	2022-01-03
22023		Insights into the hexose liver metabolism—glucose versus fructose	2017	Irrelevant	handler ikke om dose guidance	2022-01-03
22025		High order interaction analysis of SNPs in PEDF (rs12150053, rs12948385) and EPO (rs1617640) genes with clinical determinants of type 2 diabetic retinopathy patients from south India	2017	Irrelevant	Current study aims to explore the gene-gene and gene-environment interaction in the pathology of type 2 DR.	2022-01-03
22029		Low skeletal muscle mass is at increased risk of all-cause mortality in patients with type 2 diabetes	2017	Irrelevant	This study thus aimed to examine whether skeletal muscle mass index (SMI) were associated with the mortality rate in patients with T2DM	2022-01-03
22030		Time to insulin in the Trial Evaluating Cardiovascular Outomes with Sitagliptin (TECOS)	2017	Irrelevant	TECOS was a randomized, placebo-controlled trial assessing the impact of sitagliptin on cardiovascular outcomes when added to usual care in patients with type 2 diabetes (T2DM).	2022-01-03
22031		Using machine learning algorithms to identify predictive factors of clinical outcomes with iGlarLixi or iGlar in the LixiLan-L trial	2017	Irrelevant	alone in pts inadequately controlled with BI. The study randomized 736 pts and demonstrated the superiority of iGlarLixi vs iGlar in improving HbA1c.	2022-01-03
22032		Patterns of glucose-lowering medication use in patients with diabetes and heart failure: Insights from the Diabetes Collaborative Registry (DCR)	2017	Irrelevant	We used DCR to evaluate current patterns of glucose-lowering medication use in adults with T2D with and without HF.	2022-01-03
22033		TNFα antagonism and insulin resistance in non-diabetic patients suffering from psoriasis: Secondary analysis of a randomised active-controlled trial	2017	Irrelevant	handler ikke om dose guidance	2022-01-03
22034		Within-class sulfonylurea differences and cancer risk (ZODIAC-55)	2017	Irrelevant	The aim of this study was to investigate within-class SU differences in obesity and all cancers risk.	2022-01-03
22035		Association of dehydroepiandrosterone with severity of type 2 diabetes: the Rotterdam study	2017	Irrelevant	We examined whether higher levels of DHEA were associated with less complications of T2D, later initiation of insulin therapy and reduced risk of mortality.	2022-01-03
22036		Automated frequent insulin dosage titrations to enhance therapy effectiveness; lessons from the d-Nav® insulin guidance	2017	relevant	We equipped a diabetes specialty team with d-Nav to assess its impact on insulin management of patients with type 2 diabetes compared to close patient support without automatic dosage titration.	2022-01-03
22037		Protein intake in relation to development of type 2 diabetes and the role of obesity	2017	Irrelevant	Therefore, we aimed to examine the associations between habitual protein intake with insulin resistance, risk of prediabetes and risk of T2D in a large population-based cohort study.	2022-01-03
22038		Fatty liver index predicts the development of diabetes among the Japanese general population with and without impaired fasting glucose	2017	Irrelevant	We aimed to examine whether FLI predicts the development of diabetes in the general population, especially, in those with normal fasting glucose (NFG).	2022-01-03
22039		Cluster analyses of patients with dysregulated type 2 diabetes based on routine clinical markers reveal cluster-specific prevalence of diabetes complications	2017	Irrelevant	Here we tested the hypothesis that diabetes patients may be clustered based on routine clinical variables in patients with dysregulated type 2 diabetes referred to a specialist center for treatment	2022-01-03
22040		No major impact seen with sitagliptin on rates of cardiovascular death or hospitalisation for heart failure following myocardial infarction during TECOS	2017	Irrelevant	Dipeptidyl peptidase-4 inhibitors (DPP-4i) reduce myocardial infarction (MI) size in animal models, but the clinical relevance of these observations remains unknown	2022-01-03
22042		Clinical profile of post-load glucose curves and their association with cardiometabolic risk factors over time	2017	Irrelevant	We aimed to identify subgroups with distinct glucose curves following an oral glucose tolerance test (OGTT) or a mixed meal test (MMT), describe their baseline clinical characteristics and explore associations with cardiometabolic risk factors at follow-up.	2022-01-03
22043		Sex-gender differences in diabetes associated risk of cardiovascular events in a young population	2017	Irrelevant	handler ikke om dose guidance	2022-01-03
22044		Impact of treatment persistence on glycated haemoglobin A1c (HbA1c) trends among patients with type 2 diabetes newly initiated on basal insulin	2017	Irrelevant	Previous studies have suggested that greater treatment persistence is associated with improved clinical outcomes in patients with T2D; however, the relationship between persistence with basal insulin therapy and glycaemic control over time has yet to be investigated.	2022-01-03
22045		Relationship of chronic vascular complications with beta cell dysfunction and insulin resistance in newly-diagnosed type 2 diabetes. The VNDS Study	2017	Irrelevant	his study aimed at assessing the prevalence of vascular complications and their relationships with beta cell function (BF) and insulin sensitivity (IS) defects in a large cohort of patients enrolled in the Verona Newly-Diagnosed Type 2 Diabetes Study (VNDS).	2022-01-03
22046		Characteristics associated with the choice of first injectable therapy among U.S. patients with type 2 diabetes	2017	Irrelevant	The objective of this retrospective observational study was to identify and describe clinical and demographic characteristics associated with the choice of first injectable therapy (glucagon-like peptide-1 receptor agonist GLP-1 RA] or basal insulin BI]) by physicians among patients with type 2 diabetes (T2D)	2022-01-03
22047		Associations between insulin dose titration over one year and hypoglycaemia: A descriptive study using 4-T data	2017	relevant	In the 4-T study, participants were randomly allocated to three different insulin regimens, one of which was a basal insulin with daily injections of insulin detemir adjusted with an algorithm based recommendation. Comparing reports of the actual insulin dose used with that recommended provide a means of examining adherence to recommendations for insulin dose	2022-01-03
22048		Impact of human versus analog insulins on occurrence of myocardial infarction	2017	Irrelevant	This observational study uses rigorous causal inference methods of Comparative Effectiveness Research to emulate a trial evaluating the cardiovascular safety of analog versus human insulins.	2022-01-03
22049		Caffeine consumption and mortality in diabetes: An analysis of NHANES 1999-2010	2017	Irrelevant	However, the association of caffeine consumption with mortality of patients with diabetes remains unclear.	2022-01-03
22050		Contribution of telemedicine in the management of gestational diabetes: Comparison of two remote follow-ups, using mydiabby platform or a h24 hotline	2017	Irrelevant	gestational diabetes	2022-01-03
22051		Fatty acid binding protein-4 predicts MACE events in PAD patients only in those without diabetes	2017	Irrelevant	This study evaluates a possible influence of FABP4 on cardiovascular outcome in patients suffering from peripheral artery disease (PAD) in relation to glucose metabolism.	2022-01-03
22052		Long-termefficacy and safety of canagliflozin in combination with insulin in Japanese type 2 diabetes patients	2017	Irrelevant	his study investigated the efficacy and safety of canagliflozin (CAN) administration in Japanese type 2 diabetes mellitus patients with inadequate glycemic control on insulin monotherapy.	2022-01-03
22053		Clustering on baseline clinical variables identifies subgroups of type 2 diabetes patients with different rate of progression over 18 months: A DIRECT study	2017	Irrelevant	handler ikke om dose guidance	2022-01-03
22054		Universal versus risk-factor-base screening for gestational diabetes: An analysis from a 5 year Portuguese cohort	2017	Irrelevant	r Gestational Diabetes Mellitus	2022-01-03
22055		Impact of pioglitazone on stroke outcomes: A real world database analysis	2017	Irrelevant	The purpose of this study was to investigate this important pleiotropic effect in people exposed to pioglitazone as a glucose-lowering therapy	2022-01-03
22056		Costs and patient outcomes associated with adherence to basal insulin therapy for people with type 2 diabetes	2017	Irrelevant	The goal of this research is to compare costs, resource utilisation, and complications between adherent and non-adherent patients over the 3 year period post initiation on basal insulin therapy.	2022-01-03
22057		Model-based validation of c-peptide as the primary biomarker in type 1 diabetic patients: An example of experimental medicine	2017	Irrelevant	Handler ikke om doe guidance	2022-01-03
22058		CFRD treatment: Past, present, and future	2017	Irrelevant	Handler ikke om doe guidance	2022-01-03
22059		Type 2 diabetes in Vietnam: A cross-sectional, prevalence-based cost-of-illness study	2017	Irrelevant	This study aims to provide accurate and timely information about the economic impacts of type 2 diabetes mellitus (T2DM) in Vietnam.	2022-01-03
22062		Diabetic ketoacidosis risk after initiating an SGLT2 (sodium-glucose cotransporter 2) inhibitor: A population-based cohort study	2017	Irrelevant	To assess the risk of DKA after initiating an SGLT2 inhibitor compared to other antidiabetic drug	2022-01-03
22063		The association between diabetes mellitus, use of glucose lowering agents and cancer incidence among medicare patients	2017	Irrelevant	To examine the associations between diabetes, different types of diabetic medications and the risk of cancer in high-risk patients	2022-01-03
22065		The association between cardiometabolic risk clustering, retinol-binding protein 4 and adolescent insulin resistance	2017	Irrelevant	his study investigated the role of RBP4 in the adolescent "adipo-cardiovascular axis" by investigating the association of its circulating concentrations with cardiometabolic risk components and outcomes.	2022-01-03
22069		The effect of adherence to screening guidelines on the risk of Alzheimer's disease in elderly individuals newly diagnosed with diabetes mellitus	2017	Irrelevant	Handler ikke om doe guidance	2022-01-04
22070		Diabetes medications and risk of dementia and Alzheimer's disease: Pooled analysis from 5 cohorts	2017	Irrelevant	Diabetes medications can also increase dementia risk through their tendency to cause hypoglycemic episodes.	2022-01-04
22072		Nut consumption and survival in stage III colon cancer patients: Results from CALGB 89803 (Alliance)	2017	Irrelevant	However, the effect of nut intake on CC recurrence and survival is unknown	2022-01-04
22073		Trial watch: Insulin initiation for type 2 diabetes mellitus in primary care	2017		trial watch Vil det kunne ekskluderes på baggrund af ikke at være primære litteratur?	2022-01-04
22074		HbA1c variability in type 2 diabetes is associated with the occurrence of new-onset albuminuria within three years	2017	Irrelevant	To evaluate the association between HbA1c coefficient of variation (HbA1c-CV) and 3-year new-onset albuminuria risk.	2022-01-04
22076		Evaluation of the impact of pioglitazone on stroke risk and stroke outcomes: A retrospective, observational study	2017	Irrelevant	The purpose of this study was to investigate this important pleiotropic effect in people exposed to pioglitazone as a glucose-lowering therapy.	2022-01-04
22077		DGLA is associated with HOMA-IR and risk of incident but not prevalent type 2 diabetes in the multiethnic study of atherosclerosis	2017	Irrelevant	The present study aimed to evaluate whether DGLA is associated with HOMA-IR, risk of incident and prevalent T2D in a large cohort of 5,326 adult participants from the Multi-Ethnic Study of Atherosclerosis (MESA).	2022-01-04
22078		Hypoglycemia rates in type 2 diabetes mellitus: Results of the population-based InHypo-DM Study (Canada)	2017	Irrelevant	This study aimed to substantiate the population-based effect of insulin and/or sulphonylureas (SUs) on the rate of hypoglycemia.	2022-01-04
22079		Patterns of longitudinal glycemic control and outcomes among patients with type 2 diabetes	2017	Irrelevant	To analyze the effect of patterns of glycemic control over time with microvascular and macrovascular events and mortality among multiethnic patients with type 2 diabetes in Asia	2022-01-04
22080		Impact of treatment persistence on A1C trends among patients with T2D newly initiated on basal insulin	2017	Irrelevant	This retrospective observational study assessed the impact of treatment persistence on A1C levels over time in U.S. insulin-naive pts with T2D newly initiating insulin glargine 100 U/mL or insulin detemir	2022-01-04
22082		The effect of the patient-centered, smartphone-based, diabetes care system in patients with uncontrolled type 2 diabetes: A randomized controlled trial for 24 weeks	2017	relevant	For patients using insulin, the system provided guidance for insulin dosing. A multicenter, randomized controlled trial for 24 weeks was conducted to confirm its therapeutic efficacy and safety.	2022-01-04
22083		Older adults with type 2 diabetes (T2D) experience less hypoglycemia when switching to insulin glargine 300 U/ml (Gla-300) vs. other basal insulins (deliver 3 study)	2017	Irrelevant	The DELIVER 3 retrospective study examined the performance of Gla-300 in older pts with T2D in real-world clinical settings focusing on glycemic control and hypoglycemia risk.	2022-01-04
22084		Treatment impact and patient preference of insulin devices: Patient-reported outcomes (PRO) data from a randomized, crossover trial comparing insulin degludec (IDeg) u200 with insulin glargine (IGlar) u100	2017	Irrelevant	We describe PRO data on treatment impact and preference of patients with T2D from a comparison of IDeg U200 and IGlar U100.	2022-01-04
22085		Predictors of initiating basal-bolus regimen in type 2 diabetes patients with uncontrolled hyperglycemia by oral antidiabetic drugs in China	2017	Irrelevant	To investigate the proportion of basal-bolus as the basal insulin (BI) initiation regimen and related factors among type 2 diabetes mellitus (T2DM) with insufficient glycemic control by oral antidiabetic drugs (OADs	2022-01-04
22086		Diabetic peripheral neuropathy as an independent predictor of cardiovascular and renal outcomes: Post-hoc analysis of the ALTITUDE Trial	2017	Irrelevant	We assessed whether the Michigan Neuropathy Screening Instrument (MNSI) is predictive of adverse outcomes in a cohort of 8606 type 2 diabetes mellitus (T2DM) patients and chronic kidney disease (CKD), cardiovascular (CV) disease, or both enrolled in the Aliskiren Trial in Type 2 Diabetes Using Cardiorenal Endpoints (NCT00549757).	2022-01-04
22087		Time to insulin in the trial evaluating cardiovascular outcomes with sitagliptin (TECOS)	2017	Irrelevant	Among those not using insulin at baseline (n=11,263), we report the risk for progression to insulin during follow-up.	2022-01-04
22088		Profiles of patients with T2DM needing 1 to 3 injections of prandial insulin lispro per day in the autonomy trial	2017	Irrelevant	The AUTONOMY trial compared the safety and efficacy of 2 patient-titrated algorithms for the initiation and intensification of mealtime insulin lispro (IL) over 24 weeks.	2022-01-04
22089		Beneficial effects of white and brown rice on weight gain, insulin sensitivity, and gut microbiota while on high-fat diet	2017	Irrelevant	To test whether white or brown rice have differential effects that can increase the risks for diabetes, C57BL/6 mice were fed 6 different diets: control diet (CD), high fat diet (HFD) and CD and HFD with either WR or BR for 18 weeks	2022-01-04
22090		Longitudinal associations of soluble CD163 with insulin sensitivity and β-cell function: The prospective metabolism and islet cell evaluation (Promise) cohort	2017	Irrelevant	Our aim was to assess the longitudinal associations of soluble CD163 (sCD163), a novel biomarker of ATM activation, with insulin sensitivity and β-cell function in high-risk subjects.	2022-01-04
22091		Machine-learning algorithms for personalized medicine-applications for patients with type 2 diabetes initiating injectable treatments	2017	relevant	This study applied ITR to evaluate improvement of A1c control compared to usual care using real world data. I tvivl om der er en adskilt analyse ift. basal insulin	2022-01-04
22093		Insulin initiation among patients with type 2 diabetes mellitus and discontinuation of sulfonylureas	2017	Irrelevant	Characteristics of patients initiating insulin and its impact on sulfonylurea (SU) discontinuation are not well documented.	2022-01-04
22094		Transcription factor 7-like 2 (TCF7L2) gene polymorphism and progression from single to multiple autoantibody positivity in individuals at risk for type 1 diabetes	2017	Irrelevant	handler ikke om dose guidance	2022-01-04
22095		Reduced health care costs with automated basal insulin titration in patients with type 2 diabetes	2017	relevant	handler om dose guidance Automated basal insulin titration may significantly lower health care costs/patient compared with enhanced usual therapy in the real world. Men i tvivl om fokus alene er på omkostninger.	2022-01-04
22096		Proton pump inhibitor use and the risk of declining renal function in patients with diabetes	2017	Irrelevant	We studied a cohort of Japanese patients with type 1 or type 2 diabetes from a large-scale registry, to determine the prospective association between proton pump inhibitor (PPI) use and subsequent risk of declining renal function.	2022-01-04
22098		Beta-cell function decline in mexican americans: Role of weight gain and adipokines	2017	Irrelevant	The present study examines the potential role of weight gain and adipokines in mediating this effect.	2022-01-04
22099		Use of statins in patients with insulin-treated type 2 diabetes (T2D): Associations with glycemic control and mortality risks	2017	Irrelevant	handler ikke om dose guidance	2022-01-04
22101		Ten-year follow-up of a hospital-based cohort in the diabetes shared care program in Taiwan	2017	relevant	In this study, we evaluated the glycemic control and behavior change in the DSCP participants of the National Taiwan University Hospital. Usikkert om dose guidance er en del af systemet	2022-01-04
22102		Association between insulin resistance and incident chronic kidney disease in patients with type 2 diabetes in the look ahead trial	2017	Irrelevant	We sought to determine the longitudinal relationship between insulin resistance and CKD in the Look AHEAD (Action for Health in Diabetes) clinical trial of overweight/ obese adults with type 2 diabetes	2022-01-04
22103		Is statin use associated with increased albuminuria and worsening glycemic control in type 1 diabetes (T1D)?	2017	Irrelevant	Thus our objective was to examine the associations between statin use and glycemic control, insulin sensitivity, and albuminuria in a cohort with long-duration T1D.	2022-01-04
22104		Relation of branched-chain amino acids to insulin resistance and adiposity in children and young adults	2017	Irrelevant	We examined the cross-sectional and longitudinal relations of BCAA with BMI and insulin sensitivity in children randomly recruited at mean age 12.9±1.1 (baseline; n=300) and re-examined at mean age 21.6±1.7 (follow-up; n=160).	2022-01-04
22105		Intrauterine exposure to maternal diabetes or obesity and offspring insulin resistance and β-cell function: The EPOCH study	2017	Irrelevant	We examined associations of intrauterine exposure to gestational diabetes and maternal pre-pregnancy obesity with offspring insulin resistance (HOMA2- IR, Mastuda index), β-cell function (HOMA2-B, early insulin response), and the oral disposition index in a longitudinal observational study of ethnicallydiverse youth	2022-01-04
22106		Metabolomic changes during the 18-month copenhagen insulin and metformin therapy (CIMT) trial	2017	Irrelevant	Effects of 18-month metformin vs. placebo treatment on the blood metabolome were studied in 372 T2DM patients participating in the randomized, controlled CIMT trial	2022-01-04
22107		Validation of the ambulatory glucose profile as a clinical tool for reproducible interpretation and insulin dosing decisions	2017	Irrelevant	We undertook to validate interpretation and the clinical recommendations derived from it by different groups of clinicians using AGPs generated from the FreeStyle Libre™ flash continuous glucose monitoring system in 138 participants with T2D on basal-bolus insulin ± oral agents.	2022-01-04
22108		Impact of three months metformin treatment on VLDL-TG metabolism in healthy subjects and patients with type 2 diabetes	2017	Irrelevant	It was therefore an aim of this study to measure whether metformin inhibits hepatic very-low-density-lipoprotein-triglyceride (VLDL-TG) secretion.	2022-01-04
22109		SHBG is an independent predictor of cardio-metabolic risk profile on long term follow up in men with type 2 diabetes	2017	Irrelevant	We have investigated if the SHBG is associated with adverse CV risk profile in men with type 2 diabetes on long-term follow up.	2022-01-04
22110		Leptin-oxytocin axis may play an important role in patients with type 2 diabetes (T2D) and post-traumatic stress disorder (PTSD): Data from the cross-sectional study of african american male veterans	2017	Irrelevant	handler ikke om dose guidance	2022-01-04
22111		Aldosterone is associated with higher glucose, insulin resistance and incident diabetes among community dwelling adults: The multi-ethnic study of atherosclerosis	2017	Irrelevant	There is limited human data on the role of aldosterone in the development of type 2 diabetes mellitus (diabetes).	2022-01-04
22112		Sarcopenic obesity is a risk factor for metabolic syndrome in young adult men, but not women	2017	Irrelevant	We hypothesized that relative sarcopenia is associated with insulin resistance (IR) and the presence of metabolic syndrome (MetS) and type 2 diabetes mellitus (DM) in young overweight/obese adults.	2022-01-04
22115		Effects of β-cell function related genetic variants on predicting deterioration of glucose tolerance in the Chinese	2017	Irrelevant	We aimed to investigate the predicted effect of IS-GRS and IR-GRS on deterioration of glucose tolerance.	2022-01-04
22116		Clinical usefulness of immunoreactive insulin measurement in the course of OGTT	2017	Irrelevant	The aim of this study is to determine whether immunoreactive insulin (IRI) measurements in the course of an oral glucose tolerance test (OGTT) bears clinical usefulness in the evaluation of high-risk individuals.	2022-01-04
22117		Weight management in a patient with Turner's syndrome and learning difculty	2017	Irrelevant	handler ikke om dose guidance	2022-01-04
22118		Impact of 24-hour helpline service for people with diabetes	2017	relevant	To evaluate the impact and effectiveness of 24-hour helpline service in providing information and educating patients about self-management of diabetes.	2022-01-04
22119		Cost-utility of exenatide versus insulin glargine in patients with type 2 diabetes mellitus in Colombia	2017	Irrelevant	To determine the cost-effectiveness of exenatide versus insulin glargine as adjuncts to metformin for the treatment of patients with type 2 diabetes mellitus (T2DM) who have failed monotherapy.	2022-01-04
22120		Patient perspective on the impact of insulin resuspension on diabetes management and health-related quality of life	2017	Irrelevant	The OBJECTIVES of this study were to investigate type 2 diabetes (T2D) patients' perspectives on IR and its impact on diabetes management and health-related quality of life (HRQoL).	2022-01-04
22121		Insulin is most appropriate comparator to GLP-1 receptor agonists and DPP-4 inhibitors in real-world cardiovascular outcome studies	2017	Irrelevant	To illustrate selection bias when choosing inappropriate anti-diabetes medications (ADM) as comparison to incretin enhancers in cardiovascular outcome studies using real-world data.	2022-01-04
22122		A real world anti-diabetes medication cost comparison between premixed insulin analogs and long-acting insulin analogs in Chinese patients with type-2 diabetes: A retrospective database study	2017	Irrelevant	To assess and compare per-day anti-diabetic medication cost among Chinese type-2 diabetes mellitus (T2DM) insulin naive patients who initiated premixed insulin analogs (premix) or long-acting insulin analogs (long-acting).	2022-01-04
22123		Use of secondary clinical data for research related to diabetes self-management education	2017	relevant	The purpose of this study was to use EMR data to examine patients' demographic, behavioral, and diabetes risk factors by referral pattern to a DSME program in a large midwestern Academic Medical Center. Usikker hvorvidt det handler om dose guidance	2022-01-04
22124		Ophthalmic screening patterns among youths with diabetes enrolled in a large US managed care network	2017	Irrelevant	To assess the rate of obtaining ophthalmic examinations and factors associated with receipt of eye examinations for youths with diabetes.	2022-01-04
22126		Metabolite profiling: development and application of an UHR-QTOF-MS(/MS) method approach for the assessment of metabolic changes in high fat diet fed mice	2017	Irrelevant	dyrestudie	2022-01-04
22127		Mobile insulin titration intervention (MITI)-a texting program to help type 2 diabetes (T2D) patients at bellevue hospital and gouverneur health find their basal insulin dose-an interim analysis	2017	relevant	MITI aims to be clinically efficacious, patientcentered, and highly accessible (only requires text messaging and phone calls).	2022-01-04
22129		High dietary acid load is associated with risk of breast cancer: Findings from the Sister Study	2017	Irrelevant	d acidosis might promote carcinogenesis or tumor progression through influencing molecular activity such as insulin growth factor. However, there is little or no epidemiologic evidence to support a role of diet induced acidosis in cancer risk.	2022-01-04
22130		A priori-defined diet quality indexes, biomarkers, and risk of type 2 diabetes in five ethnic groups: The Multiethnic Cohort	2017	Irrelevant	This study evaluated the association of four a priori diet quality scores with HOMA-IR and T2D risk and examined biomarkers indicating potential pathways for this relation in the Multiethnic Cohort (MEC).	2022-01-04
22131		Adherence to sugar-sweetened beverages recommendations among Mexican adults with self-reported type 2 diabetes	2017	Irrelevant	To describe SSBs consumption patterns among self-reported type 2 diabetics (T2D), and estimate the association between self-reported T2D status and the adherence to SSBs recommendations.	2022-01-04
22132		Foregut exclusion is important in the treatment of type 2 diabetes mellitus (T2DM): Time-to-event analysis of T2DM resolution after successful gastrogastric fistula closure in Roux-En-Y gastric bypass patients	2017	Irrelevant	To assess if successful closure of GG fistula is associated with resolution of T2DM.	2022-01-04
22134		Titrating insulin in type 2 diabetes patients using a structured self-monitoring blood glucose regimen	2017	Irrelevant	The objective of this study was to assess the efficacy of structured blood glucose testing in guiding an insulin titration algorithm in poorly controlled, insulin-treated type 2 diabetes patients Patienterne tager en premix af basal og bolus	2022-01-04
22135		Comparative effectiveness of glycemic control in patients with type 2 diabetes treated with GLP-1 receptor agonists: A network meta-analysis of placebo-controlled and active-comparator trials	2017	Irrelevant	We conducted a Bayesian network meta-analysis (NMA) of placebo- and active-controlled randomized trials to assess the comparative effectiveness of liraglutide, albiglutide, dulaglutide, and exenatide twice daily and once weekly, with a focus on glycemic control.	2022-01-04
22136		Association between homeostasis model assessment of insulin resistance and survival in diabetic patients with acute coronary syndromes: Insights from the alecardio trial	2017	Irrelevant	The AleCardio trial compared the PPAR-α/γ agonist aleglitazar with placebo in patients with T2DM and recent ACS	2022-01-04
22137		Factors influencing implementation of a patient decision aid in a developing country: an exploratory study	2017	relevant?	This study aims to use a locally developed insulin PDA as an exemplar to explore the barriers and facilitators to implementing PDAs in Malaysia, an upper middle-income country in Asia. I tvivl om den skal med	2022-01-04
22139		Type 2 Diabetes and Risk of Hip Fractures and Non-Skeletal Fall Injuries in the Elderly: A Study From the Fractures and Fall Injuries in the Elderly Cohort (FRAILCO)	2017	Irrelevant	The primary aim of this study was to investigate the risk of hip fractures and non-skeletal fall injuries in older men and women with and without T2DM.	2022-01-04
22140		Insulin degludec in a simple or stepwise titration algorithm in a Japanese population of patients with type 2 diabetes: a randomized, 26-week, treat-to-target trial	2017	relevant	The primary aim of this trial was to compare the efficacy and safety of insulin degludec (IDeg) in a fixed versus flexible dosing schedule.	2022-01-04
22142		A national audit of SGLT2 use in England	2017	Irrelevant	handler ikke om basal insulin	2022-01-04
22143		Does the presence of NAFLD influence prescribing behaviour in Type 2 diabetes?	2017	Irrelevant	We evaluated current use of pioglitazone in Type 2 diabetes, with and without NALFD: providing baseline data for assessing the impact of this guidance.	2022-01-04
22144		Obesity as a predictor of five year cardiovascular (CV) outcomes and mortality in patients with Type 2 diabetes started on insulin therapy: Real world evidence in UK primary care	2017	Irrelevant	We compared times to major non-fatal CV event and all-cause mortality among patients with Type 2 diabetes started on insulin therapy according to their baseline body mass index (BMI) categories.	2022-01-04
22145		Safety and efficacy of IDegLira titrated once weekly vs twice weekly in patients with Type 2 diabetes uncontrolled on oral antidiabetic drugs: DUAL VI study	2017	relevant	handler om dose guidance men ift. en kombination af basal og en GLP-1 receptor agonist.	2022-01-04
22146		Adding a Glucagon like peptide-1 analogue (GLP-1RA) has a favourable effect on mortality and cardiovascular events among insulin-treated patients with Type 2 diabetes: A large retrospective UK cohort study	2017	Irrelevant	We therefore compared the times to a major non-fatal CV event and all-cause mortality among patients with Type 2 diabetes treated with insulin alone versus insulin+GLP-1RA in a large UK database.	2022-01-04
22147		Faster-acting insulin aspart vs insulin aspart as part of basal-bolus therapy improves postprandial glycaemic control in uncontrolled Type 2 diabetes in the doubleblinded onset 2 trial	2017	Irrelevant	This multicentre, double-blind, treat-to-target trial evaluated the efficacy of faster aspart vs IAsp in a basal-bolus regimen in adults with uncontrolled Type 2 diabetes on basal insulin and oral antidiabetic drugs	2022-01-04
22151		Comparing the risks of hospitalized heart failure associated with glinide, sulfonylurea, and acarbose use in type 2 diabetes: A nationwide study	2017	Irrelevant	However, the potential risks associated with the use of sulfonylurea and glinide have not been carefully evaluated.	2022-01-04
22153		Time-to-event methodology improved statistical evaluation in register-based health services research	2017	Irrelevant	We exemplify common pitfalls and want to stimulate discussions on the design, development, and deployment of future longitudinal patient registers and register-based studies.	2022-01-04
22154		Longer duration of diabetes strongly impacts fracture risk assessment: The Manitoba BMD cohort	2017	Irrelevant	. The current analysis examined the potential impact of diabetes duration on fracture risk assessment with FRAX.	2022-01-04
22155		Serum osteocalcin concentration is an independent risk for incident type 2 diabetes mellitus in Japanese postmenopausal women	2017	Irrelevant	The objective of the study was to investigate whether levels of osteocalcin are the risk of incident type 2 diabetes mellitus or no	2022-01-04
22157		A pragmatic self-titration 1 unit/day (INSIGHT) algorithm for insulin glargine 300 U/mL (Gla-300) is well-tolerated and effective	2017	relevant	This 12-week, randomized pilot study compared safety and efficacy of the INSIGHT and EDITION titration algorithms with Gla-300 in people with T2DM (insulin-naïve or on basal insulin ± OAD).	2022-01-04
22159		A physiological model of type 2 diabetes for simulating glycaemic variance and effect of insulin dose adjustments	2017	relevant	We use the model to simulate CGM data in T2D basal insulin treatment and compare the results with clinical trial results. Måske bruges det til dose guidance?	2022-01-04
22160		White blood cell subtypes and risk of type 2 diabetes	2017	Irrelevant	The present study is to investigate the relationship of white blood cell subsets with incidence of type 2 diabetes at baseline and 3 year follow-up.	2022-01-04
22161		The novel adipokine fatty acid-binding protein 4 is implicated in gestational diabetes mellitus and maternal obesity	2017	Irrelevant	We aimed at studying the potential correlation of circulating FABP4 levels with body mass index and diabetes status among pregnant women.	2022-01-04
22162		E-health as a component of holistic therapy optimization	2017	relevant	The telemedical care program of the German Institute for Telemedicine and Health Promotion (DITG) for patients with type 2 diabetes succeeded in increasing the adherence to over 80% and to convert 27% of patients with a history of more than 10 years of insulin therapy to a remission.	2022-01-04
22164		Practical focus on American diabetes association/ European association for the study of diabetes consensus algorithm in patients with type 2 diabetes mellitus: Timely insulin initiation and titration (Iran-AFECT); Sanofi Aventis(France)	2017		The aim of this study was to evaluate the safety and effectiveness of insulin glargine in a large population from a variety of clinical care in Iranian people with type 2 diabetes mellitus (T2DM) and to measure the percentage of patients achieving glycosylated hemoglobin (HbA1c) < 7% by the end of 24 weeks of treatment in routine clinical practice. I tvivl om det her også er dose guidance, når de…	2022-01-04
22165		Long-acting insulins in the treatment of type 2 diabetes and their position in the current treatment algorithm	2017	Irrelevant	expert opinion	2022-01-04
22166		Novel oral glucose lowering drugs compared to insulin are associated with lower risk of all-cause mortality, cardiovascular events and severe hypoglycemia in type 2 diabetes patients	2017	Irrelevant	To investigate if novel oral glucose lowering drugs (GLDs) compared with insulin were associated with risk of all-cause mortality, cardiovascular disease (CVD fatal/non-fatal events]) and severe hypoglycaemia in a real world setting	2022-01-04
22167		Effect of insulin glargine 300 u/ml and glargine 100 u/ml on clinical outcomes among insulin naïve patients with type 2 diabetes: A medical chart review study in the us	2017	Irrelevant	This real-world study examined changes in clinical measures before and after initiation of insulin glargine 100 units/mL (Gla-100) and Gla-300 among insulin-naïve patients with type 2 diabetes (T2D).	2022-01-04
22168		Impact of type 2 diabetes mellitus and its metabolic control on prognosis of unresectable non-small cell lung cancer patients	2017	Irrelevant	The purpose of this study is to evaluate the influence of T2DM and its MC on the prognosis of pts with NSCLC treated with concurrent chemoradiotherapy (cCT-RT).	2022-01-04
22169		Individualizing treatment of hyperglycemia in type 2 diabetes	2017	Irrelevant	review	2022-01-04
22170		Alterations in dna methylation might explain the impaired bone remodeling in diabetic patients	2017	Irrelevant	he aim of this study was to assess whether bone turnover markers were associated with global DNA methyla-tion levels in diabetic patients.	2022-01-04
22171		A quantitative systems pharmacology model of glucose responsive insulin	2017	Irrelevant	handler ikke om dose guidance	2022-01-04
22173		Long term therapy with testosterone undecanoate in type 2 diabetes was associated with reduced all-cause mortality but no significant improvement in conventional risk factors for CVD	2017	Irrelevant	To assess the impact of long term testosterone replacement with long acting Testosterone Undecanoate (TU) on metabolic parameters in a 4 years longitudinal study involving a cohort of 857 men with T2DM from the BLAST Study.	2022-01-04
22174		Insulin sensitivity and ß-cell responsiveness in obese european children and adolescents	2017	Irrelevant	Published data from cohorts of obese children and adolescents living in the US suggest a concurrent worsening of insulin sensitivity and ß-cell function over the spectrum of glucose homeostasis. If these results can be applied to European populations is currently unknown.	2022-01-04
23639		Fasting plasma glucose variability and all-cause mortality among type 2 diabetes patients: a dynamic cohort study in Shanghai, China	2016	Irrelevant	The study aims to examine whether the variation of fasting plasma glucose (FPG), represented by coefficient of variation (CV), independently predicts all-cause mortality among Chinese type 2 diabetes patients.	2022-01-04
23638		Prognostic value of glycated hemoglobin in colorectal cancer	2016	Irrelevant	To investigate the clinical significance of routinely used glycemic parameters in a cohort of colorectal cancer (CRC) patients	2022-01-04
23658		Decreased rates of hypoglycemia following implementation of a comprehensive computerized insulin order set and titration algorithm in the inpatient setting	2016	Relevant	The objective of this study was to evaluate the implementation of a computerized insulin order set and titration algorithm on rates of hypoglycemia and overall inpatient glycemic control.	2022-01-04
23681		Weight gain in insulin-treated patients by body mass index category at treatment initiation: new evidence from real-world data in patients with type 2 diabetes	2016	Irrelevant	To evaluate, in patients with type 2 diabetes (T2DM) treated with insulin, the extent of weight gain over 2 years of insulin treatment, and the dynamics of weight gain in relation to glycaemic achievements over time according to adiposity levels at insulin initiation.	2022-01-04
23698		Prevalence of unwillingness to use insulin therapy and its associated attitudes amongst patients with Type 2 diabetes in Saudi Arabia	2016	Irrelevant	his study aimed at determining the prevalence of unwillingness to use insulin and its associated attitudes amongst participants with Type 2 diabetes in Saudi Arabia.	2022-01-04
23657		Elevated lipoprotein(a) levels predict cardiovascular disease in type 2 diabetes mellitus: a 10-year prospective cohort study	2016	Irrelevant	The aim of this study was to investigate the relationship between the Lp(a) concentration and new onset CVD in type 2 diabetes.	2022-01-04
23659		Comparative effectiveness and cost-effectiveness of treat-to-target versus benefit-based tailored treatment of type 2 diabetes in low-income and middle-income countries: a modelling analysis	2016	Irrelevant	We aimed to compare the effectiveness and cost-effectiveness of two treatment approaches for diabetes management in five low-income and middle-income countries.	2022-01-04
23661		Intake of different types of dairy and its prospective association with risk of type 2 diabetes: The Rotterdam Study	2016	Irrelevant	This study aimed to investigate the impact of the full-range of dairy products and its association with incidence T2DM in Dutch adults aged ≥55 years participating in the Rotterdam Study.	2022-01-04
23670		Are patients on basal insulin attaining glycemic targets? Characteristics and goal achievement of patients with type 2 diabetes mellitus treated with basal insulin and physician-perceived barriers to achieving glycemic targets	2016	Irrelevant	To investigate treatment patterns and achievement of glycemic targets in patients with type 2 diabetes mellitus treated with basal insulin in a real-world setting, and to determine physicians' beliefs and practices regarding these patients.	2022-01-04
23671		The role of the p53 tumor suppressor in metabolism and diabetes	2016	Irrelevant	handler ikke om dose guidance	2022-01-04
23691		Impact of type 2 diabetes mellitus on recurrent myocardial infarction in China	2016	Irrelevant	To evaluate the influence of type 2 diabetes mellitus on the long-term outcomes of Chinese patients with previous myocardial infarction, we studied 864 patients with previous myocardial infarction, including 251 with type 2 diabetes mellitus and 613 without type 2 diabetes mellitus, over a median follow-up time of 2.9 years.	2022-01-04
23705		Cardiovascular events and all-cause mortality with insulin versus glucagon-like peptide-1 analogue in type 2 diabetes	2016	Irrelevant	o analyse time to cardiovascular events and mortality in patients with type 2 diabetes (T2D) who received treatment intensification with insulin or a glucagon-like peptide-1 (GLP-1ar) analogue following dual therapy failure with metformin (MET) and sulphonylurea (SU).	2022-01-04
23664		Randomized Trial of Long-Acting Insulin Glargine Titration Web Tool (LTHome) Versus Enhanced Usual Therapy of Glargine Titration (INNOVATE Trial)	2016	Relevant	LTHome, a web tool, applies a rules engine-based algorithm providing insulin titration advice directly to the patient. This pilot, randomized trial evaluates basal insulin glargine titration by LTHome compared to enhanced usual therapy ([EUT]-diabetes education program) over 12 weeks.	2022-01-04
23666		Hair follicle characteristics as early marker of Type 2 Diabetes	2016	Irrelevant	handler ikke om dose guidance	2022-01-04
23680		A Smartphone Application to Deliver a Treat-to-Target Insulin Titration Algorithm in Insulin-Naive Patients With Type 2 Diabetes: A Pilot Randomized Controlled Trial	2016	Relevant	In this pilot study, we developed a smartphone app called “Diabetes Pal” and investigated its feasibility to deliver an insulin titration algorithm in insulin-naive T2DM patients.	2022-01-04
23701		Effect of exercise on the development of new fatty liver and the resolution of existing fatty liver	2016	Irrelevant	Our aim was to determine the amount of exercise that was associated with two outcomes: a) development of incident liver fat and b) resolution of baseline liver fat, at five-year follow-up.	2022-01-04
23665		Patient-reported outcomes in transition from high-dose U-100 insulin to human regular U-500 insulin in severely insulin-resistant patients with type 2 diabetes: analysis of a randomized clinical trial	2016	Irrelevant	human insulin	2022-01-04
23667		Preventing Unnecessary Costs of Drug-Induced Hypoglycemia in Older Adults with Type 2 Diabetes in the United States and Canada	2016	Irrelevant	handler ikke om dose guidance	2022-01-04
23689		Sitagliptin and heart failure hospitalization in patients with type 2 diabetes	2016	Irrelevant	The treatment effect (for ever versus never users, and for tertiles of cumulative duration of therapy) was estimated by Cox regression incorporated with the inverse probability of treatment weighting using propensity score.	2022-01-04
23669		Different relationship between ANGPTL3 and HDL components in female non-diabetic subjects and type-2 diabetic patients	2016	Irrelevant	However, no study has looked its correlation with HDL components nor with HDL function in patients with type 2 diabetes mellitus (T2DM)	2022-01-04
23682		Metabolically healthy obesity is associated with an increased risk of diabetes independently of nonalcoholic fatty liver disease	2016	Irrelevant	This study examined whether the metabolically healthy obesity (MHO) phenotype was associated with an increased risk of diabetes in a large cohort of metabolically healthy individuals and whether that association differed by presence of nonalcoholic fatty liver disease (NAFLD).	2022-01-04
23685		Cost Effectiveness of IDegLira vs. Alternative Basal Insulin Intensification Therapies in Patients with Type 2 Diabetes Mellitus Uncontrolled on Basal Insulin in a UK Setting	2016	Irrelevant	Our aim was to investigate the cost effectiveness of IDegLira vs. basal insulin intensification therapies for patients with type 2 diabetes mellitus uncontrolled on basal insulin (glycosylated haemoglobin; HbA1c >7.5 %; 58 mmol/mol) in a UK setting	2022-01-04
23686		Metformin Improves Survival in Patients with Pancreatic Ductal Adenocarcinoma and Pre-Existing Diabetes: A Propensity Score Analysis	2016	Irrelevant	We investigated whether metformin use before PDAC diagnosis affected survival of patients with DM, controlling confounders such as diabetic severity.	2022-01-04
23742		Association of hearing impairment with insulin resistance, β-cell dysfunction and impaired fasting glucose before onset of diabetes	2016	Irrelevant	No study regarding the association of insulin resistance (IR), β-cell dysfunction and impaired fasting glucose (IFG) with hearing impairment has been reported in the population without diabetes.	2022-01-04
23695		Real-World Data Collection Regarding Titration Algorithms for Insulin Glargine in Patients With Type 2 Diabetes Mellitus	2016	Relevant	The primary objective of this study was to collect data regarding the effectiveness of different dose titration algorithms (TAs) for optimization or initiation of basal insulin supported oral therapy (BOT) in patients with type 2 diabetes	2022-01-04
23678		Evaluation of a Behavioral Mobile Phone App Intervention for the Self-Management of Type 2 Diabetes: Randomized Controlled Trial Protocol	2016	Irrelevant	The primary objective of this randomized controlled trial (RCT) is to determine the impact of bant2, an evidence-based, patient-centered, behavioral mobile app intervention, on the self-management of T2DM Includerer non-insulin diabetikere	2022-01-04
23694		XBP1s Is an Anti-lipogenic Protein	2016	Irrelevant	dyrestudie	2022-01-04
23677		Changes in ideal cardiovascular health status and risk of new-onset type 2 diabetes: The Kailuan prospective study	2016	Irrelevant	The aim of the present study was to investigate the association between the altered ideal cardiovascular health status (ΔCHS) and the risk of developing diabetes mellitus in the Kailuan population of China.	2022-01-04
23697		Role of Conventional Childhood Risk Factors Versus Genetic Risk in the Development of Type 2 Diabetes and Impaired Fasting Glucose in Adulthood: The Cardiovascular Risk in Young Finns Study	2016	Irrelevant	We examined whether the addition of novel genetic risk variant data to conventional childhood risk factors improves risk assessment of impaired fasting glucose (IFG) and type 2 diabetes in adulthood.	2022-01-04
23719		Comparative Impact of Hypoglycemic Agents on Severity and Extent of Myocardial Ischemia in Patients With Type 2 Diabetes Mellitus Undergoing Myocardial Perfusion Scintigraphy	2016	Irrelevant	We thus aimed to investigate whether individuals with type 2 diabetes mellitus treated with different drug classes exhibit different perfusion patterns at myocardial perfusion scintigraphy (MPS).	2022-01-04
23721		Change in glycated haemoglobin levels after initiating second-line therapy in type 2 diabetes: a primary care database study	2016	Irrelevant	he aim of the present study was to compare the absolute reduction in glycated haemoglobin (HbA1c) levels at 6 months after initiating second-line glucose-lowering therapy in patients with type 2 diabetes treated with metformin monotherapy in general practices.	2022-01-04
23726		Comparative cardiovascular safety of glucagon-like peptide-1 receptor agonists versus other antidiabetic drugs in routine care: a cohort study	2016	Irrelevant	To evaluate the comparative cardiovascular disease (CVD) safety of glucagon-like peptide-1 receptor agonists (GLP-1 RAs) in head-to-head comparisons with dipeptidyl peptidase-4 (DPP-4) inhibitors, sulphonylureas or insulin, when added to metformin, as used in 'real-world' patients with type 2 diabetes mellitus (T2DM).	2022-01-04
23728		Cost-effectiveness of continuous subcutaneous insulin infusion in people with type 2 diabetes in the Netherlands	2016	Irrelevant	For these patients the use of continuous subcutaneous insulin infusion (CSII) represents a useful but under-utilized alternative. The aim of the present analysis was to examine the cost-effectiveness of initiating CSII in type 2 diabetes patients failing to achieve good glycemic control on MDI in the Netherlands Insulin infuison er det også en form for dose guidance? De modtager enten human og no…	2022-01-04
23794		Biomarkers associated with severe hypoglycaemia and death in ACCORD	2016	Irrelevant	However, no blood biomarkers exist to predict these outcomes. Using participants from the Action to Control Cardiovascular Risk in Diabetes (ACCORD) study, we hypothesized that insulin deficiency and islet autoantibodies in patients with clinically diagnosed Type 2 diabetes would be associated with severe hypoglycaemia and death.	2022-01-04
23683		Increased global placental DNA methylation levels are associated with gestational diabetes	2016	Irrelevant	Gestational diabetes	2022-01-04
23684		Supported Telemonitoring and Glycemic Control in People with Type 2 Diabetes: The Telescot Diabetes Pragmatic Multicenter Randomized Controlled Trial	2016	relevant	We investigated whether health professional review of telemetrically transmitted self-monitored glucose results in improved glycemic control in people with poorly controlled type 2 diabete Usikkert hvilken behandling patienter modtager	2022-01-04
23688		Diabetes treatments and risk of heart failure, cardiovascular disease, and all cause mortality: cohort study in primary care	2016	Irrelevant	To assess associations between risks of cardiovascular disease, heart failure, and all cause mortality and different diabetes drugs in people with type 2 diabetes, particularly newer agents, including gliptins and thiazolidinediones (glitazones).	2022-01-04
23704		Dynamic Changes in Renal Function Are Associated With Major Cardiovascular Events in Patients With Type 2 Diabetes	2016	Irrelevant	. Our aim was to describe the association between renal function trajectories and the occurrence of a CV event.	2022-01-04
23706		Prevalence and Predictors of Metformin Prescribing in Adults with Type 2 Diabetes Mellitus: A National Cross-Sectional Study	2016	Irrelevant	This study evaluated the rates of metformin use in an appropriate outpatient type 2 diabetes population and identified predictors of metformin use.	2022-01-04
23714		Long term exposure to NO2 and diabetes incidence in the Black Women's Health Study	2016	Irrelevant	The purpose of the present study was to assess the association of the traffic-related nitrogen dioxide (NO2) with the incidence of diabetes in a longitudinal cohort study of African American women.	2022-01-04
23740		Cost-utility of albiglutide versus insulin lispro, insulin glargine, and sitagliptin for the treatment of type 2 diabetes in the US	2016	Irrelevant	To compare the cost-utility of the glucagon-like peptide-1 receptor agonist albiglutide with those of insulin lispro (both in combination with insulin glargine), insulin glargine, and the dipeptidyl peptidase-4 inhibitor sitagliptin, representing treatments along the type 2 diabetes treatment continuum.	2022-01-04
23781		Sex of the baby and future maternal risk of Type 2 diabetes in women who had gestational diabetes	2016	Irrelevant	In this context, we sought to determine the impact of fetal sex on the long-term risk of Type 2 diabetes in women with gestational diabetes.	2022-01-04
23707		Pre-existing diabetes and lung cancer prognosis	2016	Irrelevant	The aims of this study are to investigate the impact of pre-existing diabetes and diabetes treatments on lung cancer prognosis.	2022-01-04
23693		Within-Sulfonylurea-Class Evaluation of Time to Intensification with Insulin (ZODIAC-43)	2016	Irrelevant	The aim of this study was investigate the relationships between the three frequently used sulphonylureas, prescribed as dual therapy next to metformin, and the time needed to treatment intensification with either insulin or oral triple therapy in patients with type 2 diabetes mellitus.	2022-01-04
23696		Identifying patients with type 2 diabetes in which basal supported oral therapy may not be the optimal treatment strategy	2016	Irrelevant	The identification of patient-related characteristics that may predict a switch of the treatment strategy away from BOT after originally initiating it, would be useful when deciding on treatment strategies clinically.	2022-01-04
23702		Serum Chemerin Levels Are Associated with Abdominal Visceral Fat in Type 2 Diabetes	2016	Irrelevant	Therefore, we evaluated whether serum chemerin was associated with visceral abdominal obesity in patients with T2DM	2022-01-04
23713		Metabolomic profiling to dissect the role of visceral fat in cardiometabolic health	2016	Irrelevant	The aim of this study was to assess whether metabolomic markers of T2D and blood pressure (BP) act on these traits via visceral fat (VF) mass.	2022-01-04
23725		Increased 8-hydroxy-2'-deoxyguanosine in leukocyte DNA from patients with type 2 diabetes and microangiopathy	2016	Irrelevant	To evaluate oxidative damage in leukocytes from patients with type 2 diabetes by examining 8-hydroxy-2'-deoxyguanosine (8-OHdG) levels.	2022-01-04
23754		Evaluation of a patient self-directed mealtime insulin titration algorithm: a US payer perspective	2016	Irrelevant	To model the potential economic impact of implementing the AUTONOMY once daily (Q1D) patient self-titration mealtime insulin dosing algorithm vs standard of care (SOC) among a population of patients with Type 2 diabetes living in the US.	2022-01-04
23708		Type 2 Diabetes Risk Allele UBE2E2 Is Associated With Decreased Glucose-Stimulated Insulin Release in Elderly Chinese Han Individuals	2016	Irrelevant	The aim of the present study is to ascertain the potential associations between these variants and T2D risk in the Chinese population, and characterize diabetic-related quantitative traits underlying these variants	2022-01-04
23718		Insulin resistance and carotid intima-media thickness mediate the association between resting-state heart rate variability and executive function: A path modelling study	2016	Irrelevant	Here we examine the association between resting-state HF-HRV and executive function in a large sample of civil servants from Brazil	2022-01-04
23730		Non-Alcoholic Fatty Liver Disease in Early Pregnancy Predicts Dysglycemia in Mid-Pregnancy: Prospective Study	2016	Irrelevant	The objective of this study was to assess the association between first-trimester sonographic findings of NAFLD, and both dysglycemia and GDM in mid-pregnancy.	2022-01-04
23736		"Make Everything as Simple as Possible, but Not Simpler": a Simple Approach is as Good as a Complex Algorithm for Insulin Dose Self-Adjustment	2016		COMMENTARY? Kan ikke finde abstract?	2022-01-04
23746		Time to insulin initiation and long-term effects of initiating insulin in people with type 2 diabetes mellitus: the Hoorn Diabetes Care System Cohort Study	2016	Irrelevant	: The aim of this study was to assess the time to insulin initiation in type 2 diabetes mellitus (T2DM) patients treated with oral glucose-lowering agents and to determine the baseline characteristics associated with time to insulin initiation.	2022-01-04
23758		Treatment Intensification with Insulin Degludec/insulin Aspart Twice Daily: Randomized Study to Compare Simple and Step-Wise Titration Algorithms	2016	Irrelevant	This 26-week, multicenter, randomized, open-label, parallel-group, treat-to-target trial in adults with type 2 diabetes compared the efficacy and safety of treatment intensification algorithms with twice-daily (BID) insulin degludec/insulin aspart (IDegAsp). Basal bolus	2022-01-04
23715		Early administration of trimetazidine attenuates diabetic cardiomyopathy in rats by alleviating fibrosis, reducing apoptosis and enhancing autophagy	2016	Irrelevant	However, whether early administration of trimetazidine has an effect on diabetic cardiomyopathy and the mechanisms underlying the effect have not yet been elucidated.	2022-01-04
23710		Evaluation of serum lipid profile, body mass index, and waistline in Chinese patients with type 2 diabetes mellitus	2016	Irrelevant	The aim of this study was to assess the biochemical parameters and measures of obesity in type 2 diabetes mellitus (T2DM)	2022-01-04
23720		Insulin Resistance in Relation to Lipids and Inflammation in Type-2 Diabetic Patients and Non-Diabetic People	2016	Irrelevant	To translate our experimental findings to clinical practice, we investigated in Chinese type-2 diabetic patients and in Flemish non-diabetic people the independent and joint associations of insulin resistance with markers of dyslipidaemia and inflammation, while looking for consistency between ethnicities and across the spectrum of insulin resistance.	2022-01-04
23732		Conformational Dynamics of the Human Islet Amyloid Polypeptide in a Membrane Environment: Toward the Aggregation Prone Form	2016	Irrelevant	handler ikke om dose guidance	2022-01-04
23711		Adding glucose-lowering agents delays insulin initiation and prolongs hyperglycemia	2016	Irrelevant	This study's aim was to determine if the number of GLAs is associated with a difference in glycated hemoglobin (A1C) at insulin initiation in the US Department of Veterans Affairs Health Care System (VAHCS).	2022-01-04
23723		Insulin Signaling and Heart Failure	2016	Irrelevant	handler ikke om dose guidance	2022-01-04
23739		Branched-Chain Amino Acids and Insulin Metabolism: The Insulin Resistance Atherosclerosis Study (IRAS)	2016	Irrelevant	We investigated the associations of BCAAs with insulin sensitivity (SI), acute insulin response (AIR), and metabolic clearance of insulin (MCRI) in a multiethnic cohort.	2022-01-04
23756		Clinical inertia with regard to intensifying therapy in people with type 2 diabetes treated with basal insulin	2016	Irrelevant	To investigate whether clinical inertia, the failure to intensify treatment regimens when required, exists in people with type 2 diabetes treated with basal insulin.	2022-01-04
23789		Predictors of early discontinuation of basal insulin therapy in type 2 diabetes in primary care	2016	Irrelevant	To identify patient-related characteristics and other impact factors predicting early discontinuation of basal insulin therapy in type 2 diabetes in primary care.	2022-01-04
23798		Depressive symptoms predict non-completion of a structured exercise intervention for people with Type 2 diabetes	2016	Irrelevant	To quantify the impact of depressive symptoms on completion of exercise-based rehabilitation for Type 2 diabetes management.	2022-01-04
23836		High dietary acid load is associated with insulin resistance: The Furukawa Nutrition and Health Study	2016	Irrelevant	We examined the association of dietary acid load with markers of insulin resistance (IR), insulin secretion, and blood glucose status among Japanese workers.	2022-01-04
23837		Mismatch between health-care professionals' and patients' views on a diabetes patient decision aid: a qualitative study	2016	Irrelevant	We aimed to explore patients' and health-care professionals'(HCPs) views on the information needed in a patient decision aid (PDA) on insulin initiation developed for patients with type 2 diabetes mellitus	2022-01-04
23724		All-Cause and Cause-Specific Mortality among Users of Basal Insulins NPH, Detemir, and Glargine	2016	Irrelevant	To estimate the differences in all-cause and cause-specific mortality rates between new users of basal insulins in a population-based study in Finland.	2022-01-04
23729		Association of glucose homeostasis measures with heart rate variability among Hispanic/Latino adults without diabetes: the Hispanic Community Health Study/Study of Latinos (HCHS/SOL)	2016	Irrelevant	This study aimed to examine the association of glucose homeostasis measures with cardiac autonomic function among diverse Hispanic/Latino adults without diabetes.	2022-01-04
23734		Risks of cardiovascular diseases associated with dipeptidyl peptidase-4 inhibitors and other antidiabetic drugs in patients with type 2 diabetes: a nation-wide longitudinal study	2016	Irrelevant	This study was aimed to assess comparative risks of CVD, including ischemic stroke, myocardial infarction (MI) and HF, and hypoglycemia of DPP4i with other antidiabetic drugs	2022-01-04
23735		Serum magnesium is inversely associated with coronary artery calcification in the Genetics of Atherosclerotic Disease (GEA) study	2016	Irrelevant	The aim of this study was to examine the cross-sectional association of serum magnesium levels with CAC.	2022-01-04
23727		Use of Add-on Treatment to Metformin Monotherapy for Patients with Type 2 Diabetes and Suboptimal Glycemic Control: A U.S. Database Study	2016	Irrelevant	To evaluate treatment addition for metformin monotherapy users with suboptimal glycemic control and associated factors.	2022-01-04
23737		Basal insulin initiation in primary vs. specialist care: similar glycaemic control in two different patient populations	2016	Irrelevant	To investigate the effect of healthcare provider (HCP) type (primary vs. specialist) on glycaemic control and other treatment parameters	2022-01-04
23738		The intraoperative glycemic response to intravenous insulin during noncardiac surgery: a subanalysis of the DeLiT randomized trial	2016	Irrelevant	We examined the impact of body weight and presence of diabetes on the response to insulin during noncardiac surgery.	2022-01-04
23743		Is common genetic variation at IRS1, ENPP1 and TRIB3 loci associated with cardiometabolic phenotypes in type 2 diabetes? An exploratory analysis of the Verona Newly Diagnosed Type 2 Diabetes Study (VNDS) 5	2016	Irrelevant	We conducted an exploratory analysis by testing whether common genetic variability at IRS1, ENPP1 and TRIB3 loci is associated with cardiovascular risk traits and metabolic phenotypes in T2DM.	2022-01-04
23744		Influence of Adiposity, Physical Activity, Fitness, and Screen Time on Insulin Dynamics Over 2 Years in Children	2016	Irrelevant	To assess whether adiposity, fitness, moderate-to-vigorous physical activity, and screen time predict insulin sensitivity or insulin secretion during a 2-year period in children with a family history of obesity.	2022-01-04
23750		Insulin resistance: The linchpin between prediabetes and cardiovascular disease	2016	Irrelevant	The aim of this study was to test the hypothesis that cardiovascular disease occurs to the greatest extent in persons with prediabetes mellitus who are also insulin resistant	2022-01-04
23751		Impaired glucose metabolism increases risk of hepatic decompensation and death in patients with compensated hepatitis C virus-related cirrhosis	2016	Irrelevant	: We examined the influence of glucose abnormalities on overall mortality and liver-related complications in cirrhotic patients.	2022-01-04
23772		Blood pressure and glycaemic effects of dapagliflozin versus placebo in patients with type 2 diabetes on combination antihypertensive therapy: a randomised, double-blind, placebo-controlled, phase 3 study	2016	Irrelevant	We aimed to compare blood pressure and glycaemic effects of the SGLT2 inhibitor dapagliflozin with placebo in patients with inadequately controlled type 2 diabetes mellitus and hypertension	2022-01-04
23776		Use of incretin agents and risk of pancreatic cancer: a population-based cohort study	2016	Irrelevant	To investigate the association between the use of incretin agents and the risk of pancreatic cancer	2022-01-04
23854		Lipopolysaccharide-binding protein cannot independently predict type 2 diabetes mellitus: A nested case-control study	2016	Irrelevant	The aim of the present study was to investigate the association between serum LBP levels and the risk of developing T2DM.	2022-01-04
23741		Effect of Serum Cholesterol on Insulin Secretory Capacity: Shimane CoHRE Study	2016	Irrelevant	In this study, we aimed to examine whether there was a relationship between the serum level of total cholesterol (TC) and the insulin secretory capacity in healthy subjects.	2022-01-04
23733		Integrated sensor-augmented pump therapy systems [the MiniMed® Paradigm™ Veo system and the Vibe™ and G4® PLATINUM CGM (continuous glucose monitoring) system] for managing blood glucose levels in type 1 diabetes: a systematic review and economic evaluation	2016	Irrelevant	review	2022-01-04
23745		In-Silico Trials for Glucose Control in Hospitalized Patients with Type 2 Diabetes	2016	Irrelevant	basal-bolus regime	2022-01-04
23747		Effects of Age on Glycemic Control in Patients With Type 2 Diabetes Treated with Insulin Detemir: A Post-Hoc Analysis of the PREDICTIVE™ 303 Study	2016	Irrelevant	This post-hoc sub-analysis investigated whether age (<65 years vs ≥65 years) affects glycemic control or hypoglycemic risk in patients with type 2 diabetes mellitus (T2DM) treated with once-daily insulin detemir.	2022-01-04
23748		Barriers to effective management of type 2 diabetes in primary care: qualitative systematic review	2016	Irrelevant	To guide quality improvement strategies for type 2 diabetes by synthesising qualitative evidence on primary care physicians' and nurses' perceived influences on care	2022-01-04
23759		Metabolic responses to a traditional Mexican diet compared with a commonly consumed US diet in women of Mexican descent: a randomized crossover feeding trial	2016	Irrelevant	The purpose of this study was to test in a randomized crossover feeding trial the metabolic responses to a Mexican diet compared with a commonly consumed US diet.	2022-01-04
23768		Artificially Sweetened Beverage Consumption Is Positively Associated with Newly Diagnosed Diabetes in Normal-Weight but Not in Overweight or Obese Brazilian Adults	2016	Irrelevant	We examined the relation of ASB intake with newly diagnosed diabetes and measures of glucose homeostasis in a large Brazilian cohort of adults.	2022-01-04
23770		Utilization of a Cloud-Based Diabetes Management Program for Insulin Initiation and Titration Enables Collaborative Decision Making Between Healthcare Providers and Patients	2016	Relevant	Recent advances in mobile technology have enabled new models of collaborative care between patients and healthcare providers (HCPs). We hypothesized that the adoption of such technology could help individuals starting basal insulin achieve better glycemic control compared with standard clinical practice.	2022-01-04
23752		Is visceral adiposity a modifier for the impact of blood pressure on arterial stiffness and albuminuria in patients with type 2 diabetes?	2016	Irrelevant	We aimed to investigate whether visceral adiposity could modify the impact of blood pressure on arterial stiffness and albuminuria in patients with type 2 diabetes.	2022-01-04
23788		Metformin use and survival after colorectal cancer: A population-based cohort study	2016	Irrelevant	This study aimed to investigate whether colorectal cancer patients with type 2 diabetes who were exposed to metformin had reduced cancer-specific mortality.	2022-01-04
23757		CLOCK gene variation is associated with incidence of type-2 diabetes and cardiovascular diseases in type-2 diabetic subjects: dietary modulation in the PREDIMED randomized trial	2016	Irrelevant	. However, no longitudinal study has investigated the association between CLOCK gene variation and T2D or CVD incidence.	2022-01-04
23763		Clinical and Economic Outcomes Associated With the Timing of Initiation of Basal Insulin in Patients With Type 2 Diabetes Mellitus Previously Treated With Oral Antidiabetes Drugs	2016	Irrelevant	This retrospective database analysis investigated clinical and economic outcomes associated with the timing of insulin initiation in patients with T2DM treated with ≥1 OAD in a real-world US setting.	2022-01-04
23634		Incorporating Environmental Outcomes into a Health Economic Model	2016	Irrelevant	ith the growing interest in reducing the environmental impact of human activities, the need to consider how to include environmental outcomes into HTAs has increased. We present a simple method of doing so	2022-01-04
23766		Mean HbA1c and mortality in diabetic individuals with heart failure: a population cohort study	2016	Irrelevant	Using the time-weighted mean of serial HbA1c measurements has been found to be a better predictor of diabetic complications as it reflects the glycaemic burden for that individual over time. We therefore sought to confirm this in a large cohort of patients with T2DM and incident	2022-01-04
23774		The importance of postprandial glycemic control: optimizing add-on therapy to basal insulin	2016	Irrelevant	handler om add-on til insulin	2022-01-04
23775		Insulin dependence as an independent predictor of perioperative morbidity after ventral hernia repair: a National Surgical Quality Improvement Program analysis of 45,759 patients	2016	Irrelevant	We examined the variable effect of IDDM and NIDDM on 30-day medical and surgical complications after VHR	2022-01-04
23778		Association of sex hormone-binding globulin and free testosterone with mortality in men with type 2 diabetes mellitus	2016	Irrelevant	e hypothesized that the prognostic role of testosterone in men with type 2 diabetes mellitus (T2DM) is influenced by its carrier protein sex hormone-binding globulin (SHBG).	2022-01-04
23779		Irisin in the Glucose Continuum	2016	Irrelevant	Irisin, a novel myokine has been involved in the pathogenesis of type 2 diabetes (T2D) and metabolic syndrome. The aim of the current study was to investigate this association by comparing individuals from the whole spectrum of carbohydrate disturbances	2022-01-04
23785		Protein Biomarkers for Insulin Resistance and Type 2 Diabetes Risk in Two Large Community Cohorts	2016	Irrelevant	We used a novel high-throughput 92-protein assay to identify circulating biomarkers for HOMA of IR in two cohorts of community residents without diabetes (n = 1,367) (mean age 73 ± 3.6 years).	2022-01-04
23816		Association of Serum Ferritin Level with Risk of Incident Abnormal Glucose Metabolism in Southwestern China: a Prospective Cohort Study	2016	Irrelevant	This prospective cohort study aimed to analyze the association between serum ferritin levels and the risk of abnormal glucose metabolism (AGM) in Southwestern Chinese population.	2022-01-04
21009		The effect of community groups and mobile phone messages on the prevention and control of diabetes in rural Bangladesh: Study protocol for a three-arm cluster randomised controlled trial	2016	Irrelevant	In this study, we will test the effect of two different interventions on diabetes occurrence and its risk factors in rural Bangladesh.	2022-01-04
21011		Evaluation of a prediction model for the development of atrial fibrillation in a repository of electronic medical records	2016	Irrelevant	To validate the AF risk prediction model originally developed by the Cohorts for Heart and Aging Research in Genomic Epidemiology-Atrial Fibrillation (CHARGE-AF) investigators using a large repository of electronic medical records (EMRs).	2022-01-04
21012		Prognostic implications of biomarker assessments in patients with type 2 diabetes at high cardiovascular risk: A secondary analysis of a randomized clinical trial	2016	Irrelevant	To assess the incremental prognostic value of biomarkers that reflect different pathophysiologic processes in patients with type 2 diabetes.	2022-01-04
21013		Winner's Curse Correction and Variable Thresholding Improve Performance of Polygenic Risk Modeling Based on Genome-Wide Association Study Summary-Level Data	2016	Irrelevant	handler ikke om dose guidance	2022-01-04
21014		Cost-effectiveness of a National Telemedicine Diabetic Retinopathy Screening Program in Singapore	2016	Irrelevant	To determine the incremental cost-effectiveness of a new telemedicine technician-based assessment relative to an existing model of family physician (FP)–based assessment of diabetic retinopathy (DR) in Singapore from the health system and societal perspectives.	2022-01-04
21016		Circulating angiogenic factors in diabetes patients in a tertiary hospital in Ghana	2016	Irrelevant	handler ikke om dose guidance	2022-01-04
21019		Feedback from physical activity monitors is not compatible with current recommendations: A recalibration study	2016	Irrelevant	The aim of this study was to recalibrate the feedback from self-monitoring.	2022-01-04
21020		Trabecular Bone Score (TBS) and TBS-Adjusted Fracture Risk Assessment Tool are Potential Supplementary Tools for the Discrimination of Morphometric Vertebral Fractures in Postmenopausal Women With Type 2 Diabetes	2016	Irrelevant	This study compared the performance of TBS, BMD, and original and TBS-adjusted Fracture Risk Assessment Tool (FRAX®) scores in the discrimination of vertebral fractures (VFs) in T2DM patients.	2022-01-04
21022		The cost-effectiveness of hospital-based telephone coaching for people with type 2 diabetes: A 10 year modelling analysis	2016	relevant	The purpose of this study is to assess the cost-effectiveness of telephone coaching, compared to usual diabetes care, in participants with poorly controlled T2DM. Usikkert hvilken behandling patienterne modtager	2022-01-04
21024		Individual long-term albuminuria exposure during angiotensin receptor blocker therapy is the optimal predictor for renal outcome	2016	Irrelevant	The aim of this study was to assess individual albuminuria fluctuations after the initial ARB response and to determine whether taking individual albuminuria fluctuations into account improves renal outcome prediction.	2022-01-04
21025		Clinical Effectiveness of Liraglutide in Type 2 Diabetes Treatment in the Real-World Setting: A Systematic Literature Review	2016	Irrelevant	review	2022-01-04
21026		Dynamics in insulin requirements and treatment safety	2016	relevant	We investigated intra-individual dynamics of insulin requirements using data from a service evaluation of the d-Nav® Insulin Guidance Service. This service facilitates automated insulin dosage adjustments, as often as needed, to achieve and maintain optimal glycemic balance.	2022-01-04
21027		Estimation of adjusted rate differences using additive negative binomial regression	2016	Irrelevant	Handler ikke om dose guidance	2022-01-04
21030		Visceral adiposity index is associated with pre-diabetes and type 2 diabetes mellitus in Chinese adults aged 20-50	2016	Irrelevant	. Our aim was to determine the associations of VAI with dysglycemia (the combination of diabetes and pre-diabetes) and to compare the predictive ability for dysglycemia between VAI and traditional obesity indices.	2022-01-04
21031		Serum albumin-adjusted glycated albumin is a better predictor of mortality in diabetic patients with end-stage renal disease on hemodialysis	2016	Irrelevant	We evaluated whether serum albumin-adjusted GA (adjusted GA) could predict mortality in diabetic patients with ESRD on hemodialysis.	2022-01-04
21032		Implementation of interval walking training in patients with type 2 diabetes in Denmark: Rationale, design, and baseline characteristics	2016	Irrelevant	handler om understøttelse af fysisk aktivitet	2022-01-04
21033		Fatty liver index is a risk determinant of incident type 2 diabetes in a metabolically healthy population with obesity	2016	Irrelevant	This study investigated the effect of fatty liver disease (FLD) on the risk of incident type 2 diabetes in a population with metabolically healthy obesity (MHO).	2022-01-04
21035		Shift in responsibilities in diabetes care: The Nurse-Driven Diabetes In-Hospital Treatment protocol (N-DIABIT)	2016	Relevant	To investigate the feasibility, safety and efficacy of the Nurse-Driven Diabetes In-Hospital Treatment protocol (N-DIABIT), which consists of nurse-driven correctional therapy, in addition to physician-guided basal therapy, and is carried out by trained ward nurses.	2022-01-04
21036		A prospective randomized controlled study of a virtual clinic integrating primary and specialist care for patients with Type 2 diabetes mellitus	2016	Relevant	To investigate the effectiveness of a diabetes virtual clinic to enhance diabetes in primary care by developing clinical management plans for patients with suboptimal metabolic control and/or case complexity.	2022-01-04
21039		Examining the relationship between HbA1c and diabetes risk models in a European population indicates a lower threshold to identify 'high risk' is required	2016	Irrelevant	This study examined whether changes in HbA1c values are reflected in the risk scores and categories of four validated risk-assessment tools (QDiabetes, Leicester Risk Assessment, Finnish Diabetes Risk Score and Cambridge Risk Score). Handler om kadiovasulær risiko	2022-01-04
21040		Comparison of the heart failure risk stratification performance of the CKD-EPI equation and the MDRD equation for estimated glomerular filtration rate in patients with Type 2 diabetes	2016	Irrelevant	To investigate the risk prediction and the risk stratification performances of the Chronic Kidney Disease Epidemiology Collaboration (CKD–EPI) equation and the Modification of Diet in Renal Disease (MDRD) equation for estimated glomerular filtration rate (eGFRCKD–EPI vs. eGFRMDRD) on heart failure in patients with Type 2 diabetes.	2022-01-04
21041		Text message-based diabetes self-management support (SMS4BG): Study protocol for a randomised controlled trial	2016	Irrelevant	This study aims to assess whether SMS4BG can improve glycaemic control in adults with poorly controlled diabetes. This paper outlines the rationale and methods of the trial.	2022-01-04
21045		Validation of methods for assessing cardiovascular disease using electronic health data in a cohort of Veterans with diabetes	2016	Irrelevant	Previous studies have estimated the positive predictive value (PPV) of International Classification of Disease, Ninth Revision (ICD-9) codes for acute myocardial infarction (MI), but the sensitivity of these codes for all true events and the accuracy of coding algorithms for prevalent disease status at baseline are largely unknown.	2022-01-04
21049		Patient considerations in type 2 diabetes – Role of combination dapagliflozin–metformin XR	2016	Irrelevant	kan ikke finde abstract	2022-01-04
21050		Reclassification of genetic-based risk predictions as GWAS data accumulate	2016	Irrelevant	In this analysis, we quantified reclassification of genetic risk based on past and anticipated future GWAS data.	2022-01-05
21051		Meta-analysis of complex diseases at gene level with generalized functional linear models	2016	Irrelevant	Handler ikke om dose guidance	2022-01-05
21053		Serum Vascular Adhesion Protein-1 Predicts End-Stage Renal Disease in Patients with Type 2 Diabetes	2016	Irrelevant	In this study, we investigated if serum VAP-1 can predict end-stage renal disease in diabetic subjects.	2022-01-05
21055		Tree-based identification of subgroups for time-varying covariate survival data	2016	Irrelevant	We propose a method to identify subsets of time-varying covariate risk factors that affect survival while adjusting for possible confounders	2022-01-05
21058		Impact of UKPDS risk estimation added to a first subjective risk estimation on management of coronary disease risk in type 2 diabetes - An observational study	2016	Irrelevant	To investigate the impact of the UKPDS risk engine on management of CHD risk in T2DM patients.	2022-01-05
21060		Model analysis of effect of canagliflozin (Invokana), a sodium-glucose cotransporter 2 inhibitor, to alter plasma 1,5-anhydroglucitol	2016	Irrelevant	Using an AG mass balance model, we analyzed literature data on plasma AG before and after initiation of canagliflozin therapy (CT) to quantitatively characterize the effect of CT on AG reabsorption.	2022-01-05
21061		Adherence to NICE guidance on glucagon-like peptide-1 receptor agonists among patients with type 2 diabetes mellitus: An evaluation using the Clinical Practice Research Datalink	2016	Irrelevant	To assess adherence to the UK’s National Institute for Health and Care Excellence (NICE) guidelines for initiating and continuing glucagon-like peptide-1 (GLP-1) receptor agonists in patients with type 2 diabetes (T2DM).	2022-01-05
21062		Improving the Quality of Outpatient Diabetes Care Using an Information Management System: Results from the Observational VISION Study	2016	Relevant	This study aimed to evaluate the effects of information management system (IMS) use with individuals with type 1 and type 2 diabetes who were treated in outpatient settings.	2022-01-05
21063		Many faces of thyroid hormone deficiency	2016	Irrelevant	kan ikke finde abstract	2022-01-05
21066		Telemedicine in response to challenges of modern diabetology	2016	Irrelevant	review	2022-01-05
21067		An illustration of the use of the Cl-Nav diabetes insulin guidance service: An insulin titration aid for type 2 diabetes	2016	Relevant	handler om dose guidance, men jeg er i tvivl om det er et primære studie	2022-01-05
21069		Disparities in the use of a mHealth medication adherence promotion intervention for low-income adults with type 2 diabetes	2016	Irrelevant	Little is known about what factors impede engagement, so the authors examined the relationship between patient factors and engagement in an mHealth medication adherence promotion intervention for low-income adults with type 2 diabetes (T2DM).	2022-01-05
21070		The Motivating Function of Healthcare Professional in eHealth and mHealth Interventions for Type 2 Diabetes Patients and the Mediating Role of Patient Engagement	2016	Irrelevant	This cross-sectional study included a sample of 93 Italian-speaking type 2 diabetes patients and demonstrated the role of the perceived ability of healthcare professionals to motivate patients’ initiative in improving the level of their engagement and activation in type 2 diabetes self-management.	2022-01-05
21072		RN Diabetes Virtual Case Management: A New Model for Providing Chronic Care Management	2016	Relevant	This article describes a new model of diabetes chronic care delivery: nurse-delivered care that includes protocol-based insulin titration and patient education delivered solely in a virtual environment.	2022-01-05
22176		Visit-to-visit variation of fasting plasma glucose is a predictor of hip fracture in older persons with type 2 diabetes: the Taiwan Diabetes Study	2016	Irrelevant	We investigated the association between fasting plasma glucose variability (FPG-CV) and the risk of hip fracture in elderly diabetic patients.	2022-01-05
22177		Early age at natural menopause is a risk factor for type 2 diabetes: The rotterdam study	2016	Irrelevant	We aimed to examine the association between age at natural menopause and the risk of T2D.	2022-01-05
22178		Incremental burden of type 2 diabetes mellitus in patients hospitalized for heart failure	2016	Irrelevant	To evaluate the incremental economic burden of T2DM in patients hospitalized for HF.	2022-01-05
22179		Soluble CD163, adiponectin, C-reactive protein and progression of dysglycaemia in individuals at high risk of type 2 diabetes mellitus: the ADDITION-PRO cohort	2016	Irrelevant	Our aim was to investigate the association between the macrophage-activation marker soluble CD163 (sCD163), adiponectin, C-reactive protein (CRP) and changes in glycaemia, insulin resistance and insulin secretion in individuals at high risk of type 2 diabetes mellitus.	2022-01-05
22180		Autoimmune diabetes in adults and risk of myocardial infarction: the HUNT study in Norway	2016	Irrelevant	To investigate the risk of myocardial infarction (MI) in AIDA compared to type 2 diabetes, taking into consideration the effects of socio-economic and lifestyle factors, the metabolic syndrome and glycaemic control.	2022-01-05
22181		Insulin resistance score is useful for predicting pioglitazone response in patients with type 2 diabetes mellitus who failed a sulfonylurea and metformin regimen	2016	Irrelevant	. The aim of this study was to develop a score system for pioglitazone response in patients with type 2 diabetes who failed a sulfonylurea and metformin regimen.	2022-01-05
22182		Improvement in quality of life after initiation of basal insulin therapy: Results from the ORBIT Study	2016	Irrelevant	To determine the effects on HRQoL after initiating BI in insulin-naïve patients with type 2 diabetes mellitus (T2DM) uncontrolled by oral antihyperglycemic drugs (OADs), we investigated the change in HRQoL and its predictors based on an Observational Registry of Basal Insulin Treatment (ORBIT) study.	2022-01-05
22184		Relationship between insulin adherence and health care resource utilization among type 2 diabetes patients in China	2016	Irrelevant	To assess the association between insulin adherence and healthcare resource utilization and direct medical costs among Chinese insulin-naïve patients with type 2 diabetes (T2D).	2022-01-05
22185		Flexibly modelling HBA1C progression in type 2 diabetes to estimate the impact of clinical inertia on costs and quality adjusted life years	2016	Irrelevant	he objective of this study was to characterise the clinical and health economic consequences of treatment delay in the UK setting	2022-01-05
22186		Relation between the TRIB3 Gln84Arg genetic variation and vascular complications in type 2 diabetes: An analysis of a 2 × 2 factorial randomised controlled trial	2016	Irrelevant	We aimed to explore the effect of this genetic variation on major vascular outcomes in patients with type 2 diabetes after blood pressure lowering and glycaemic control treatment.	2022-01-05
22187		Impaired pancreatic β-cell compensatory function in Chinese patients with type 2 diabetes and high genetic risk: A 9-year prospective cohort study	2016	Irrelevant	We aimed to assess the combined effects of type 2 diabetes risk variants on predicting deterioration of blood glucose tolerance, and progressive changes in β-cell function and insulin sensitivity in a prospective cohort in the Chinese population	2022-01-05
22188		Retinopathy, neuropathy, and subsequent cardiovascular events in patients with type 2 diabetes and acute coronary syndrome: Analysis from elixa and importance of duration of diabetes	2016	Irrelevant	handler ikke om dose guidance	2022-01-05
22189		A paradoxical relationship of plasma adiponectin to cardiovascular risk in patients with diabetes and recent acute coronary syndrome-the alecardio trial	2016	Irrelevant	Therefore, we investigated the relation between Adn concentrations and total mortality and CV events in the AleCardio trial that compared the PPAR-α/γ agonist aleglitazar with placebo in patients with T2D and acute coronary syndrome (ACS).	2022-01-05
22190		Association of genetic variation in the α2A-adrenergic receptor gene with risk of gestational diabetes	2016	Irrelevant	gestational diabetes	2022-01-05
22191		Cardiovascular safety of glucose-lowering agents as add-on medication to metformin treatment in type 2 diabetes: report from the Swedish National Diabetes Register	2016	Irrelevant	To investigate the relative safety of various glucose-lowering agents as add-on medication to metformin in type 2 diabetes in an observational study linking five national health registers.	2022-01-05
22193		Cost-effectiveness of a risk-based secondary screening programme of type 2 diabetes	2016	Irrelevant	The objective of this study was to develop a long-term economic model for type 2 diabetes to describe the entire spectrum of the disease over a wide range of healthcare programmes.	2022-01-05
22194		Dose-response relationship between sulfonylureas and major adverse cardiovascular events in elderly patients with type 2 diabetes	2016	Irrelevant	The objective of this study was to determine if there is a dose-response relationship between sulfonylureas and major adverse cardiovascular events (MACE).	2022-01-05
22196		Diabetes mellitus type 1 in pediatric patients with African background in Germany, Austria and Luxembourg: Analysis based on the DPV registry	2016	Irrelevant	We aimed to analyze demographic characteristics and medical care of pediatric patients with African background in Germany, Austria and Luxembourg.	2022-01-05
22197		mHealth in management of type 1 diabetes: A systematic review of the published clinical trials (METTLE)	2016	Irrelevant	review	2022-01-05
22198		Oral glucocorticoids and rates of incident diabetes mellitus and hypertension in children with juvenile idiopathic arthritis and attention-deficit/hyperactivity disorder	2016	Irrelevant	We studied rates of new-onset DM and HTN after oral GC exposure compared with non-users separately in children with JIA and children with attentiondeficit/ hyperactivity disorder (ADHD), a non-immune reference population.	2022-01-05
22199		Health-related quality of life of adults with type 2 diabetes reporting diabetic foot disease	2016	Irrelevant	To examine the association of foot problems with health-related quality of life (HRQOL) in adults with type 2 diabetes in Alberta.	2022-01-05
22202		Comparison of adherence and persistence among adults with type 2 diabetes mellitus initiating saxagliptin or linagliptin	2016	Irrelevant	The objective of this study was to compare adherence and persistence over a 12-month period between patients initiating saxagliptin and patients initiating linagliptin, two dipeptidyl peptidase-4 inhibitors.	2022-01-05
22203		Resting heart rate and measures of effort-related cardiac autonomic dysfunction predict cardiovascular events in asymptomatic type 2 diabetes	2016	Irrelevant	handler ikke om dose guidance	2022-01-05
22204		Plasma dehydroepiandrosterone levels are inversely associated with the risk of type 2 diabetes: The Rotterdam Study	2016	Irrelevant	To assess the relationships between DHEA and its main derivatesdehydroepiandrosterone sulfate (DHEAS) and androstenedione, with the risk of incident T2D.	2022-01-05
22205		Clinical outcomes of the United4Health (U4H) project in patients with diabetes: A European large-scale telehealth deployment project	2016	Relevant	The aim of this study was to evaluate the impact of large scale deployment of TH for patients with DM on the reduction in HbA1c and healthcare resources used in 9 regions of 8 European countries	2022-01-05
22206		Time to treatment intensification and its association with subsequent macrovascular outcomes among patients with type 2 diabetes	2016	Irrelevant	his study assessed the association between timing of treatment intensification and subsequent macrovascular outcomes among patients with T2DM in the UK.	2022-01-05
22207		Safety and efficacy of IDegLira titrated once weekly (1W) vs twice weekly (2W) in patients with type 2 diabetes uncontrolled on oral antidiabetic drugs: DUALVI study	2016	Irrelevant	This trial compared the safety and efficacy of a simpler titration algorithm to that used in previous DUAL trials in insulinnaïve patients. Behandles med premixed insulin	2022-01-05
22208		Impact of delaying treatment intensification in type 2 diabetes uncontrolled on basal insulin: A longitudinal study of US Administrative claims database	2016	Irrelevant	The aim of the study is to evaluate the effect of delaying treatment intensification with glucagon-like peptide-1 (GLP-1) receptor agonists (RAs) (GLP-1 RA) in longitudinal change of clinical outcomes and economic burden in patients with type 2 diabetes (T2DM) uncontrolled on basal insulin (BI)	2022-01-05
22209		Safety and efficacy of a pragmatic self-titration 1 unit/day (INSIGHT) algorithm for insulin glargine 300 U/mL (Gla-300)	2016	Relevant	The objective of this 12-week, randomized, descriptive pilot study was to compare safety and efficacy of two titration algorithms, INSIGHT and EDITION, for GLA-300 in T2DM patients (insulin-naïve or on basal insulin ± OAD) mainly in a primary care setting.	2022-01-05
22210		The ratio of deep to whole subcutaneous adipose tissue thickness is higher in type 2 diabetes and relates to insulin resistance and liver fat content	2016	Irrelevant	handler ikke om dose guidance	2022-01-05
22211		Association between changes in body weight and glycaemic control following insulin initiation in people with type 2 diabetes: A UK primary care study	2016	Irrelevant	We therefore aimed to establish the association between changes in weight at 1 year post-insulin initiation and glycaemic control (HbA1c reduction) and to clarify if any association is independent of baseline HbA1c and GLT.	2022-01-05
22212		Health service utilisation and costs of treatment with either exenatide twice daily or basal insulin for patients with type 2 diabetes: A retrospective UK study	2016	Irrelevant	In this study we estimated resource use following initiation with exenatide twice daily (EBID), compared to basal insulin.	2022-01-05
22213		Hypoglycaemia as a function of HbA1c in type 2 diabetes: Insulin glargine 300 U/ml in a patient-level meta-analysis of EDITION 1, 2 and 3	2016	Irrelevant	The objective of the current analysis was to evaluate rates of confirmed (≤3.9 mmol/l) or severe hypoglycaemia over 6 months of treatment with Gla-300 or Gla-100 in these EDITION studies, as a function of HbA1c.	2022-01-05
22214		Survival as a function of HbA1c in people with type 2 diabetes using differing glucose-lowering regimens	2016	Irrelevant	Our purpose was to characterise survival as a function of HbA1c in those treated with six glucose-lowering regimens that are differentially associated with hypoglycaemia risk.	2022-01-05
22215		Time to treatment intensification and its association with subsequent microvascular outcomes among patients with type 2 diabetes	2016	Irrelevant	This study assessed the association between timing of treatment intensification and subsequentmicrovascular outcomes among patients with T2DM in the UK.	2022-01-05
22216		Obese patients gain less weight than non-obese patients when treated with insulin, with similar HbA1c reduction: New evidence from realworld data in type 2 diabetes	2016	Irrelevant	The objective was to evaluate the body weight and HbA1c changes over 2 years post insulin initiation in T2DM, in relation to BMI at the time of insulin initiation, and the possible association of glycaemic control with weight gain.	2022-01-05
22218		Role of the “resistin pathway” on cardiovascular risk factors and major cardiovascular events	2016	Irrelevant	handler ikke om dose guidance	2022-01-05
22219		Muscle mass decline as a significant risk factor for type 2 diabetes development in middle-age subjects during the prospective 1000PLUS cohort study	2016	Irrelevant	. Aim of our study was to investigate risk factors associated with type 2 development in middle-age (mean 47 yrs old) subjects during the 5-year prospective observational cohort study.	2022-01-05
22220		Safety and tolerability of alogliptin in patients with type 2 diabetes: Pooled analysis of 20 double-blind randomised controlled clinical studies	2016	Irrelevant	handler ikke om dose guidance	2022-01-05
22221		Severity of hypoglycaemia and health related quality of life and work productivity in type 2 diabetes patients	2016	Irrelevant	This study examined the association between severity of hypoglycemia and the health related quality of life (HRQoL) and work productivity of adults with type 2 diabetes mellitus (T2DM) in Europe (UK, Germany, France, Italy, Spain)	2022-01-05
22222		Evaluation of the use of new communication technologies in patients with type 2 diabetes	2016	Relevant	The aim of this study was to assess the efficacy and satisfaction of patients with a telematics system based on an online platform.	2022-01-05
22223		Reduced utilisation of health care provider resources with automated basal insulin titration in patients with type 2 diabetes	2016	Relevant	. Use of health information technology for insulin titration may offer similar glycaemic effectiveness and lead to reduced utilisation ofHCP resources. LTHome (LTH) is a web tool that applies a rules engine-based algorithm for insulin titration.	2022-01-05
22224		DPP4-i/SGLT-2i combination as add-on to metformin for type 2 diabetes mellitus: Comparison to OADs, GLP-1RAs or basal insulin	2016	Irrelevant	Handler ikke om dose guidance	2022-01-05
22225		Effect of empagliflozin when added to insulin in patients with type 2 diabetes and high cardiovascular (CV) risk: Results from EMPAREG OUTCOME	2016	Irrelevant	As patients with T2DM using insulin represent a vulnerable population, we investigated changes in HbA1c and weight, hypoglycaemia and CVoutcomes in patients taking insulin at baseline.	2022-01-05
22226		Nonalcoholic fatty liver disease is associated with incident type 2 diabetes in combined hyperlipidaemic pedigrees: A 10-years follow-up study	2016	Irrelevant	handler ikke om dose guidance	2022-01-05
22227		Hypoglycaemia is associated with increased risk of cardiovascular events: Results from the EXAMINE trial	2016	Irrelevant	We evaluated the consequence of reported hypoglycemia on the risk for subsequent major adverse CV events (MACE; CV death, nonfatal myocardial infarction or nonfatal stroke).	2022-01-05
22229		Gestational diabetes: What is the real level of risk? Data from the French population in 2012	2016	Irrelevant	Gestational diabetes	2022-01-05
22230		Association of maternal diabetes and diabetes medication treatment during pregnancy with attention-deficit/hyperactivity disorder in offspring	2016	Irrelevant	Gestational diabetes	2022-01-05
22231		T-cadherin gene (CDH13) polymorphisms, adiponectin levels and Fatty Liver Index (FLI) in D.E.S.I.R	2016	Irrelevant	The aim of the present study was to investigate the association between allelic variations of CDH13, circulating adiponectin levels and FLI.	2022-01-05
22232		Differences in persistence by class of oral therapy for the treatment of type 2 diabetes	2016	Irrelevant	handler om orale medikamenter	2022-01-05
22234		Metformin and other glucose-lowering drug initiation and rates of community-based antibiotic use and hospital-treated infections in patients with Type 2 Diabetes: A danish nationwide population-based cohort study	2016	Irrelevant	To examine the rates of community-based antibiotic use and hospital-treated infection in initiators of metformin and other glucose-lowering drugs (GLDs).	2022-01-05
22235		Treatment discontinuation and rates of hypoglycemia in Type 2 Diabetes patients treated with dipeptidyl peptidase-4 (DDP-4) inhibitors or NPH insulin as third-line therapy	2016	Irrelevant	To compare therapy discontinuation and hypoglycemia hospitalization rates among T2DM patients initiating either DPP-4 inhibitors or NPH insulin	2022-01-05
22236		Risk of hypoglycaemia in users of sulphonylureas with renal impairment: A population-based cohort study	2016	Irrelevant	: To determine whether treatment with SUs only in patients with renal impairment is associated with a higher risk of hypoglycaemia compared to metformin- only users.	2022-01-05
22237		Adjusting for the effect of switching basal insulin treatment on the risk of first severe hypoglycaemia	2016	Irrelevant	The objective of this study is to estimate and compare the incidence of first SH among type 2 diabetes mellitus (T2DM) patients treated with insulin detemir, glargine and NPH, accounting for insulin switching with the use of Marginal Structural Models (MSM).	2022-01-05
22238		Predictability of Electronic Medical Record (EMR)-based patient characteristics using health care utilization data in patients with Type 2 Diabetes Mellitus (T2DM) initiating glucose-lowering agents	2016	Irrelevant	The objective of this study is to estimate and compare the incidence of first SH among type 2 diabetes mellitus (T2DM) patients treated with insulin detemir, glargine and NPH, accounting for insulin switching with the use of Marginal Structural Models (MSM).	2022-01-05
22239		Impact of pay-for-performance on mortality in diabetes patients in Taiwan	2016	Irrelevant	Therefore, this study aimed to investigate the impact of a P4P program on mortality in patients with type 2 diabetes.	2022-01-05
22241		Genetic relationships between random glucose, six glycaemic traits and type 2 diabetes	2016	Irrelevant	handler ikke om dose guidance	2022-01-05
22244		Optimizing diabetes control in people with Type 2 diabetes through nurse-led telecoaching	2016	Relevant	o study the effect of a target-driven telecoaching intervention on HbA1c and other modifiable risk factors in people with Type 2 diabetes.	2022-01-05
22250		Self-monitoring of blood glucose in newly treated type 2 diabetes mellitus	2016	Irrelevant	The objectives of this study were to describe the use of SMBG in a cohort of newly treated T2DM subjects and to assess the contribution of SMBG on overall prescription costs. Behandles ikke med insulin	2022-01-05
22251		Is flatbush, NY, in Florida?-a case of ketosis prone diabetes	2016	Irrelevant	Handler ikke om doe guidance	2022-01-05
22252		Clinical factors associated with sudden cardiac death in type 2 diabetes: Insights from the SAVOR-TIMI 53 trial	2016	Irrelevant	Handler ikke om doe guidance	2022-01-05
22254		Treatment outcomes with the use of a stepwise insulin combinations algorithm among type 2 diabetic patients	2016	Relevant	This study looked into a stepwise insulin combinations treatment algorithm used in an Endocrinology referral clinic at the University of Santo Tomas Hospital (USTH).	2022-01-05
22258		Does genetic ancestry influence the metabolic response to a traditional Mexican versus U.S. diet? A randomized crossover feeding trial among first and second generation women of Mexican descent	2016	Irrelevant	handler ikke om dose guidance	2022-01-05
22259		Results of the randomized trial of longacting insulin glargine titration web tool (lthome) vs. Enhanced usual therapy of glargine titration (innovate trial)	2016	Relevant	INNOVATE is a randomized, investigator-initiated trial evaluating the safety and efficacy of basal insulin glargine titration by LT Home compared to Enhanced Usual Therapy (EUT - healthcare provider driven diabetes education program) over 12 weeks.	2022-01-05
22260		Patient satisfaction score changes in the randomized trial of long-acting insulin glargine titration web tool (lthome) vs enhanced usual therapy of glargine titration (innovate)	2016	Relevant	tilfredshedsscore : INNOVATE is a randomized, investigator-initiated trial, supported by Sanofi, that evaluates the safety and efficacy of basal insulin glargine titration by LT Home compared to Enhanced Usual Therapy (EUT - healthcare provider driven DEP) over 12 weeks.	2022-01-05
22261		A randomized trial comparing bolus-only insulin patch versus pen using simple dosetitration algorithm in type 2 diabetes patients not achieving glycemic targets on basal insulin	2016	Irrelevant	basal bolus regime	2022-01-05
22262		Liver-related outcomes in a large cohort of patients with type 2 diabetes on insulin or sulphonylureas in association with metformin therapy	2016	Irrelevant	Although the relationships between fatty liver, insulin resistance and hyperinsulinaemia are well recognized, very little is known about the effect of exogenous insulin treatment on liver-related outcomes in people with Type 2 diabetes.	2022-01-05
22263		Social deprivation, diabetic foot ulceration and mortality: Conclusions of a primary care based study	2016	Irrelevant	To determine whether social deprivation in the presence of diabetes is an independent predictor of developing foot ulceration (FU) and to determine whether deprivation modifies the association between diabetes and mortality in those who develop the condition.	2022-01-05
22264		The association between psychological distress and starting insulin therapy in people with Type 2 diabetes: A prospective cohort study	2016	Irrelevant	We analysed whether diabetes specific distress is associated with insulin initiation delay according to current NICE guidance on insulinrequiring status	2022-01-05
22265		Serum calcium and diabetes: The atherosclerosis risk in communities (ARIC) study	2016	Irrelevant	We hypothesized that serum calcium concentration would be positively and independently associated with diabetes incidence	2022-01-05
22266		Psychological distress and low health locus of control are associated with insulin resistance	2016	Irrelevant	To cross-sectionally assess the hypothesis that PD and low HLoC are associated with insulin resistance in a Swedish population	2022-01-05
22267		Association of soluble tumor necrosis factor receptors 1 and 2 with nephropathy, cardiovascular events, and total mortality in type 2 diabetes	2016	Irrelevant	herefore, we aimed to explore the levels of sTNFRs, and their association with prevalent kidney disease, incident cardiovascular disease, and risk of mortality independently of baseline kidney function and microalbuminuria in a cohort of patients with type 2 diabetes.	2022-01-05
22268		Association of genetic variants in INS (rs689), INSR (rs1799816) and PP1G.G (rs1799999) with type 2 diabetes (T2D): a case–control study in three ethnic groups from North-West India	2016	Irrelevant	Therefore, the present study was initiated to examine the differences, if any, in the contribution of polymorphisms towards T2D susceptibility in the background of different ethnic specifications.	2022-01-05
22272		Effect of metformin on survival in pancreatic ductal adenocarcinoma	2016	Irrelevant	We investigated whether metformin use prior to PDAC diagnosis is associated with improved survival of patients with DM.	2022-01-05
22274		Glycemic variability during algorithmic titration of insulin among hospitalized patients with type 2 diabetes and heart failure	2016	Irrelevant	ser på basal-bolus regime	2022-01-05
22275		HbA1c and all-cause mortality risk among patients with type 2 diabetes	2016	Irrelevant	Several prospective studies have evaluated the association between glycosylated hemoglobin (HbA1c) and death risk among diabetic patients. However, the results have been inconsistent.	2022-01-05
22277		Genetic variants associated with lean and obese type 2 diabetes in a Han Chinese population A case-control study	2016	Irrelevant	The aim of the present study was to identify the associations of T2D-related genetic variants with the risks for lean and obese T2D among the Chinese Han population.	2022-01-05
22278		Exploring visceral adiposity index as a predictor of visceral adiposity dysfunction and evaluating its performance in predicting hepatic insulin resistance in Indian type 2 diabetics	2016	Irrelevant	This study aimed to explore an optimal VAI cut off value for predicting VAD as reflected quantitatively by magnetic resonance imaging (MRI) and to evaluate its merit in predicting the severity of the cardiometabolic risk (CMR) in type 2 diabetic patients of India.	2022-01-05
22279		Changes in ideal cardiovascular health status and risk of new-onset type 2 diabetes The Kailuan prospective study	2016	Irrelevant	The aim of the present study was to investigate the association between the altered ideal cardiovascular health status (DCHS) and the risk of developing diabetes mellitus in the Kailuan population of China.	2022-01-05
22280		Non-alcoholic fatty liver disease in obese adolescent girls is associated with insulin resistance and predictors of cardiometabolic disease	2016	Irrelevant	We hypothesized that obese girls with NAFLD would have adipose, hepatic, and muscle IR and increased predictors of cardiometabolic disease relative to similarly obese girls without NAFLD.	2022-01-05
22281		Association of self-reported recurrent mild hypoglycemia with incident cardiovascular disease and all-cause mortality in patients with type 2 diabetes Prospective analysis of the Joint Asia Diabetes Evaluation Registry	2016	Irrelevant	We examined the association of self-reported recurrent mild hypoglycemic events with cardiovascular disease (CVD) and all-cause mortality in a prospective cohort of Chinese adults with type 2 diabetes.	2022-01-05
22282		Thyroid function and type 2 diabetes risk: A population-based prospective cohort study	2016	Irrelevant	We aimed to investigate the association of thyroid function with incident prediabetes, incident diabetes and progression from prediabetes to diabetes in a prospective population-based cohort study.	2022-01-05
22283		Effects of short term GLP-1 receptor agonist treatment on bone mineral density and bone turnover in patients with type 2 diabetes: A randomized, placebo-controlled, double-blinded, cross-over trial	2016	Irrelevant	The aim of this study was to investigate the effects of short-term liraglutide treatment on markers of bone health in patients with type 2 diabetes.	2022-01-05
22284		The effect of diabetes mellitus on non-small cell lung cancer treatment and tumor characteristics	2016	Irrelevant	The intention of this study was to explore the relationship between DM and tumor characteristics, treatment modalities, and survival in non-small cell lung cancer.	2022-01-05
22285		Overt proteinuria is less prevalent in type 2 diabetic patients with high fasting C-peptide levels	2016	Irrelevant	We evaluated the association between fasting C-peptide levels and prevalence of diabetic nephropathy in T2DM patients, and investigated the renoprotective properties of Cpeptide.	2022-01-05
22286		The anthropometric and cardiometabolic profile of adolescence is associated with increased risk of metabolic syndrome in early adulthood	2016	Irrelevant	We explored how adolescent anthropometric and cardiometabolic profile related to t	2022-01-05
22287		Long-term use of dipeptidyl peptidase 4 inhibitors and risk of fractures	2016	Irrelevant	The aim of our study was to investigate the association between longer-term use of DPP4-I and risk of fracture in the present study.	2022-01-05
22288		Daily self-monitored glucose profiles in patients with type 2 diabetes mellitus (T2DM) treated with once-weekly dulaglutide vs once-daily insulin glargine in award-2 and-4	2016	Irrelevant	handler ikke om dose guidance	2022-01-05
22289		Postprandial hyperinsulinemia was associated with coronary heart diseases (CHD) in patients with type 2 diabetes	2016	Irrelevant	In this study, we investigated 566 type 2 diabetes patients without insulin therapy.	2022-01-05
22290		The hemoglobin glycation index does not predict the risk for complications in patients treated with aleglitazar: A post hoc analysis from the alecardio trial	2016	Irrelevant	We determined whether the HGI predicts outcomes of aleglitazar in the AleCardio trial.	2022-01-05
22291		Insulin sensitivity and hyperfiltration in adolescents with type 2 diabetes (T2D) in the today clinical trial	2016	Irrelevant	We hypothesized that IS would predict HF over time in adolescents with T2D.	2022-01-05
22293		Ethnic disparities in medication persistence in type 2 diabetes: Non-whites have reduced persistence	2016	Irrelevant	We compare persistence between ethnic groups in the UK where healthcare is free at the point of care and adjust for socioeconomic factors.	2022-01-05
22294		The american heart association ideal cardiovascular health and incident type 2 diabetes mellitus among african americans: The jackson heart study	2016	Irrelevant	We investigated the association between the AHA ideal CVH metrics and incident diabetes among African Americans in the Jackson Heart Study	2022-01-05
22295		Hypoglycemia is associated with increased risk of cardiovascular events: Results from the examine trial	2016	Irrelevant	We evaluated the consequence of reported hypoglycemia on the risk for subsequent major adverse CV events (MACE; CV death, nonfatal myocardial infarction or nonfatal stroke).	2022-01-05
22296		Factors influencing continuation of insulin therapy in patients with diabetes mellitus type 2 at hospital discharge	2016	Irrelevant	The aim of this analysis was to determine which factors are influencing continuation of insulin therapy in patients with diabetes mellitus type 2 (T2D) at hospital discharge.	2022-01-05
22297		Association between hba1c with cardiovascular (CV) events and all-cause mortality in elderly patients with insulin-treated type 2 diabetes (T2D)	2016	Irrelevant	We studied the association between HbA1c and CV morbidity and all-cause mortality in 4,589 adults with T2D (>65 yrs), and no history of CV disease, following treatment intensification by starting insulin (mean age 73±6 yrs; wt 87±18kg; HbA1c 8.5±1.8%).	2022-01-05
22300		Insulin therapy transformation in Northern Ireland	2016	Irrelevant	Insulin users with inadequate A1c levels have been enrolled in the d-Nav® Insulin Guidance Service. d-Nav is a handheld device that analyzes stored glucose patterns and titrates insulin dosage weekly or more frequently as required, based on individual needs. Jeg er i tvivl om det er en expert opionion?	2022-01-05
22301		Does insulin-induced weight gain affect cardiovascular risk in type 2 diabetes? a retrospective cohort study of 13,099 patients in primary care	2016	Irrelevant	We investigated the impact of body wt changes on CV morbidity and all-cause mortality in a cohort of 13,099 adults with insulin-treated T2D	2022-01-05
22302		Looking for predictors of successful basal insulin titration in T2DM	2016	Irrelevant	We studied the characteristics distinguishing patients able (“good titrators” GT)] or unable (“poor titrators” PT)] to reach target pre-meal morning glucose <130 mg/dL following initiation of basal insulin (bedtime NPH/ glargine; initial dose: 2 U; titration: +2U/72 h) in 112 T2DM (81% white Caucasians) in secondary failure to oral glucose-lowering drugs. GT] amounted to 41% (n=46).	2022-01-05
22303		Titration and optimization (TOP) trial for insulin glargine u100 (Gla-100) in type 2 diabetes (T2DM) patients (PTS) poorly controlled on oral antidiabetic drugs	2016	Relevant	. This is a prospective (12 months), observational study in T2DM pts in German GP offices to assess efficacy of different Gla-100 titration algorithms	2022-01-05
22304		A prospective study on dietary and supplemental zinc intake and risk of type 2 diabetes depending on genetic variation in SLC30A8	2016	Irrelevant	We aimed to study the association between zinc intake (from diet and supplements) and risk of T2D, and hypothesized that the association between the rs13266634 C-allele and T2D may be modified by zinc intake	2022-01-05
22305		A biphasic OGTT curve as an indicator of risk for type 1 diabetes (T1D)	2016	Irrelevant	Therefore, we examined the relation of T1D development to the biphasic glucose response in autoantibody positive (Ab+) relatives of T1D patients from the DPT-1 study.	2022-01-05
23662		Rapid Acting Insulin Use and Persistence among Elderly Type 2 Diabetes Patients Adding RAI to Oral Antidiabetes Drug Regimens	2016	Irrelevant	We examined the real-world utilization and persistence of rapid acting insulin (RAI) in elderly patients with type 2 diabetes who added RAI to their drug (OAD) regimen.	2022-01-05
23690		The Relation between Serum Uric Acid and HbA1c Is Dependent upon Hyperinsulinemia in Patients with Newly Diagnosed Type 2 Diabetes Mellitus	2016	Irrelevant	. The aim of our study was to explore the dependent condition of the relationship between uric acid and blood glucose in type 2 diabetes.	2022-01-05
23709		Association between exposures to brominated trihalomethanes, hepatic injury and type II diabetes mellitus	2016	Irrelevant	The objectives of this study were to: i) determine the association of urinary brominated THM (BrTHM) levels and T2DM disease status, and ii) investigate the association between urinary BrTHM levels and serum alanine aminotransferase (ALT) concentrations, often used as surrogate markers of NAFLD.	2022-01-05
23760		Basal insulin persistence, associated factors, and outcomes after treatment initiation among people with type 2 diabetes mellitus in the US	2016	Irrelevant	To assess basal insulin persistence, associated factors, and economic outcomes for insulin-naïve people with type 2 diabetes mellitus (T2DM) in the US	2022-01-05
[truncated: 1,950 more rows]

## Sheet: Fulltext screening
Ref ID	Link	Titel	Udgivelsesår	Forfatter	Study population	Study design	Intervention method/type	Insulin givet til patienter	reported outcome	Intervention length	Setting	Evt. eksklusions årsag	Gennemgået (dato)	Peer-reviewed
[truncated: 270 more rows]

[truncated: 7 more sheets: Opdated search, eligible, Study duration, Outcomes - math, Outcomes - tele, Outcome - paper, User experience]
